# Supplementary material for: The Fungal Histone Acetyl Transferase Gcn5 Controls Virulence of the Human Pathogen Candida albicans through Multiple Pathways
Source: Sci Rep. 2019 Jul 1;9:9445. doi: 10.1038/s41598-019-45817-5 (PMC6603162; doi:10.1038/s41598-019-45817-5)
Supplement: Supplementary file 4 — Dataset 1 [file 41598_2019_45817_MOESM4_ESM.xlsx]

## Sheet: Title
The Fungal Histone Acetyl Transferase Gcn5 Controls Virulence of the Human Pathogen Candida albicans through Multiple Pathways
Raju Shivarathri1, Michael Tscherner1, Florian Zwolanek1, Nitesh Kumar Singh2, Neeraj Chauhan3,4† and Karl Kuchler1†,
From The
1Medical University Vienna, Max F. Perutz Laboratories, Campus Vienna Biocenter, A-1030 Vienna, Austria
2Current Address: Qia ULB-Epigénétique du Cancer, Faculté Médecine, Route de Lennik 808, Bruxelles – Belgium
3Public Health Research Institute & 4Department of Microbiology, Biochemistry and Molecular Genetics, New Jersey Medical School, Rutgers, The State University of New Jersey, Newark, NJ 07103, USA
† To whom correspondence can be addressed:
Karl Kuchler
Medical University Vienna, Max F. Perutz Laboratories
Department of Medical Biochemistry
Dr. Bohr-Gasse 9/2; A-1030 Vienna, Austria
Ph: +43-1-4277-61807; FAX: +43-1-4277-9618
e-mail: karl.kuchler@meduniwien.ac.at
and/or
Neeraj Chauhan
Public Health Research Institute - PHRI
Department of Microbiology, Biochemistry and Molecular Genetics
New Jersey Medical School
Rutgers, The State University of New Jersey
225 Warren Street, Newark, NJ 07103, USA
Ph: +1-973-854-3470; FAX: +1-973-854-3101
e-mail: chauhan1@njms.rutgers.edu

## Sheet: Dataset
Candida ID	Gene	ScOrtholog	Description	log2 FC CSP_15/0_wt	log2 FC CSP_45/0_wt	log2 FC CSP_15/0_gcn5∆/∆	log2 FC CSP_45/0_gcn5∆/∆	log2 FC gcn5∆/∆/wt_0	log2 FC gcn5∆/∆_CSP_15/wt_CSP_15	log2 FC gcn5∆/∆_CSP_45/wt_CSP_45
CR_06710C_B	GCN5	GCN5	Histone acetyltransferase; required for hyphen elongation and cell wall organization; mutation confers hypersensitivity to 5-fluorouracil (5-FU)	NA	NA	NA	NA	-5.52	-6.06	-6.13
C6_01990W_B	PLB1		Phospholipase B; host cell penetration and virulence in mouse systemic infection; Hog1-induced; signal sequence, N-glycosylation, and Tyr phosphorylation site; induced in fluconazole-resistant strains; rat catheter biofilm repressed	-3.6034	-6.61287	NA	-1.71473	-4.71	-2.26	NA
C1_13870W_B	MET3	MET3	ATP sulfurlyase; sulfate assimilation; repressed by Met, Cys, Sfu1, or in fluconazole-resistant isolate; Hog1, caspofungin, white phase-induced; induced on biofilm formation, even in presence of Met and Cys; Spider, F-12/CO2 biofilm induced	NA	-4.05271	NA	NA	-3.64	-2.51	NA
CR_06950C_B	ATX1	ATX1	Putative cytosolic copper metallochaperone; flucytosine induced; Ssr1-repressed; rat catheter biofilm induced	-3.71917	-3.78723	NA	NA	-3.63712	NA	NA
C6_03700W_B	ALS1		Ortholog of C. dubliniensis CD36 : Cd36_10990, C. parapsilosis CDC317 : CPAR2_804585, Candida tenuis NRRL Y-1498 : cten_CGOB_00256 and Debaryomyces hansenii CBS767 : DEHA2F10406g	NA	1.88405	NA	NA	-3.28	-3.08	-4.6
C5_01070C_B	orf19.1964		Protein of unknown function; repressed by fluphenazine treatment; induced by benomyl treatment and in an RHE model; regulated by Nrg1, Tup1	-2.00456	-3.78743	NA	NA	-3.27	-1.98	NA
C6_04380W_B	ALS2		Ortholog of Candida albicans WO-1 : CAWG_00134	NA	-2.56541	NA	NA	-3.21	-2.62	-2.09
C4_04770C_B	MNN22		Alpha-1,2-mannosyltransferase; required for normal cell wall mannan; regulated by Tsa1, Tsa1B at 37 deg; repressed in core stress response; NO, Hog1 induced; confers sensitivity to cell wall perturbing agents; Spider biofilm repressed	NA	NA	NA	NA	-3.05	-3.19	-3.1
C3_01540W_B	orf19.1691		Plasma-membrane-localized protein; filament induced; Hog1, ketoconazole, fluconazole and hypoxia-induced; regulated by Nrg1, Tup1, Upc2; induced by prostaglandins; flow model biofilm induced; rat catheter and Spider biofilm repressed	-4.80786	-8.0733	-3.32185	-4.44701	-2.96951	NA	NA
C3_06860C_B	orf19.6816	YJR096W	Putative xylose and arabinose reductase; flow model biofilm induced; Spider biofilm repressed	-2.7274	-2.70455	NA	NA	-2.81508	NA	NA
C1_05960W_B	PGA45		Putative GPI-anchored cell wall protein; repressed in core caspofungin response; Hog1-induced; regulated by Ssn6; Mob2-dependent hyphal regulation; flow model biofilm induced	-2.68392	-6.63553	-1.93769	-4.36501	-2.81	-2.06	NA
C1_02250W_B	CWH8	CAX4	Putative dolichyl pyrophosphate (Dol-P-P) phosphatase; ketoconazole-induced; expression is increased in a fluconazole-resistant isolate; clade-associated gene expression; Hap43p-induced gene	NA	-2.31655	1.54052	NA	-2.76	-2.27	NA
C6_04130C_B	ALS4		GPI-anchored adhesin; role in adhesion, germ tube induction; growth, temperature regulated; expressed during infection of human buccal epithelial cells; repressed by vaginal contact; biofilm induced; repressed during chlamydospore formation	NA	-1.80544	NA	NA	-2.7	-1.87	-1.75
C1_09250W_B	CRP1		Copper transporter; CPx P1-type ATPase; mediates Cu resistance; similar to Menkes and Wilson disease proteins; copper-induced; Tbf1-activated; suppresses Cu sensitivity of S. cerevisiae cup1 mutant; flow model biofilm induced	-5.42829	-4.84966	-1.96436	-1.93371	-2.64397	NA	NA
CR_06650C_B	orf19.699		Protein of unknown function; flow model, rat catheter, Spider biofilm induced	-1.87753	-2.24774	NA	NA	-2.52159	-1.52	NA
C3_05280C_B	orf19.6007		Predicted fatty acid acyl transferase-related protein domain; repressed by prostaglandins	NA	NA	NA	NA	-2.51	-2.99	-1.85
C6_01510W_B	OYE23		Putative NAPDH dehydrogenase; induced by nitric oxide, benomyl; oxidative stress-induced via Cap1; Hap43p-repressed; rat catheter biofilm induced	NA	NA	NA	NA	-2.46	-2.88	-2.97
C4_00450C_B	PGA10		GPI anchored membrane protein; utilization of hemin and hemoglobin for Fe in host; Rim101 at ph8/hypoxia/ketoconazole/ciclopirox/hypha-induced; required for RPMI biofilm formation, Bcr1-induced in a/a biofilm; rat catheter biofilm repressed	-2.55539	-5.49507	-2.42646	-3.29853	-2.43	-2.3	NA
C2_06570C_B	orf19.33		Predicted ORF from Assembly 19; removed from Assembly 20; restored based on transcription data; similar to orf19.7550	NA	-3.19274	-1.78205	-2.01047	-2.43	-3.14	NA
C1_12850W_B	BLP1		Protein of unknown function, serum-induced	-2.55875	-3.04186	-1.97045	-1.54748	-2.43	-1.85	NA
C6_02100W_B	orf19.3499		Secreted potein; Hap43-repressed; fluconazole-induced; regulated by Tsa1, Tsa1B under H2O2 stress conditions; induced by Mnl1p under weak acid stress; Spider biofilm induced	NA	NA	NA	1.80395	-2.37	-2.35	NA
C1_10590W_B	snR62		C/D box small nucleolar RNA (snoRNA)	NA	NA	NA	NA	-2.3	-2.54	NA
CR_01870C_B	orf19.2585		Ortholog of Candida albicans WO-1 : CAWG_01548	-1.58913	-2.96371	NA	NA	-2.28713	NA	NA
C4_03430W_B	MOH1	MOH1	Ortholog of S. cerevisiae Moh1, essential for staionary phase growth; induced by alpha pheromone in SpiderM medium and by Mnl1 under weak acid stress; possibly essential (UAU1 method); flow model biofilm induced; Spider biofilm induced	NA	NA	NA	NA	-2.27	-2.33	-1.69
C1_04100C_B	POR1	POR1	Mitochondrial outer membrane porin; in detergent-resistant membrane fraction (possible lipid raft component); antigenic in human, mouse; Hap43p-induced; flucytosine-, macrophage-, farnesol- induced; fluconazole, caspofungin repressed	NA	NA	NA	NA	-2.24	-2.37	-1.88
C1_05950C_B	orf19.2452		Protein of unknown function; induced in high iron; repressed in core caspofungin response; ketoconazole-repressed; colony morphology-related gene regulation by Ssn6; possibly subject to Kex2 processing	-2.69657	-3.46894	NA	NA	-2.21541	NA	NA
C1_05140W_B	BRG1		Transcription factor; recruits Hda1 to hypha-specific promoters; Tn mutation affects filamentation; Hap43-repressed; Spider and flow model biofilm induced; required for Spider biofilm formation; Bcr1-repressed in RPMI a/a biofilms	NA	NA	NA	NA	-2.14	-1.92	-2.77
C4_01760W_B	orf19.4617	MAK3	Predicted peptide alpha-N-acetyltransferase; flow model biofilm induced	-2.01625	-1.91437	NA	NA	-2.12948	NA	NA
C6_02560W_B	orf19.5525	YMR315W	Putative oxidoreductase; protein levels affected by URA3 expression in CAI-4 strain background; Efg1, Efh1 regulated; Rgt1-repressed; protein present in exponential and stationary growth phase yeast; rat catheter biofilm repressed	-2.34713	-2.6312	NA	NA	-2.10762	NA	NA
C1_05160C_B	orf19.449	YKR070W	Putative phosphatidyl synthase; stationary phase enriched protein; transcript repressed by yeast-hypha switch; Hap43-repressed; rat catheter, Spider and flow model biofilm induced	NA	NA	NA	NA	-2.10116	NA	NA
C3_03360W_B	FCY2		Purine-cytosine permease of pyrimidine salvage; mutation associated with resistance to flucytosine in clinical isolates; transposon mutation affects filamentation; farnesol-upregulated in biofilm	-1.92607	-2.54358	NA	NA	-2.08898	NA	NA
C3_05610W_B	MNN14		Predicted alpha-1,3-mannosyltransferase activity with a role in protein glycosylation; Hap43-repressed; Spider biofilm induced	NA	NA	NA	NA	-2.08	-2.5	-2.06
C6_00840W_B	GPX2		Similar to glutathione peroxidase; induced in high iron; alkaline induced by Rim101; induced by alpha factor or interaction with macrophage; regulated by Efg1; caspofungin repressed; Spider biofilm induced	NA	NA	NA	NA	-2.06	-1.92	-2.51
C1_04770C_B	ERG3	ERG3	C-5 sterol desaturase; introduces C-5(6) double bond into episterol; some clinical isolates show increased azole resistance and defects in hyphal growth and virulence; Efg1p-repressed; fluconazole-induced	-2.83514	-3.15395	NA	-1.565	-2.05003	NA	NA
C5_02630C_B	MNN1		Putative alpha-1,3-mannosyltransferase; of the mannosyltransferase complex; negatively regulated by Rim101; transcript elevated in chk1 and nik1 mutants, but not in sln1 mutant; Spider and flow model biofilm induced	NA	NA	NA	NA	-2.05	NA	-2.03
C6_00790C_B	CTR1	CTR1	Copper transporter; transcribed in low copper; induced Mac1, Tye7, macrophage interaction, alkaline pH via Rim101; 17-beta-estradiol repressed; complements S. cerevisiae ctr1 ctr3 copper transport mutant; flow model/Spider biofilm induced	2.5918	2.95491	NA	NA	-2.01	-4.46	-4.99
C1_10810W_B	orf19.2336		Pry family pathogenesis-related protein; predicted to be extracellular	NA	-2.13213	NA	NA	-2.00711	NA	NA
C1_10400C_B	FGR41		Putative GPI-anchored adhesin-like protein; transposon mutation affects filamentous growth; Spider biofilm repressed	NA	NA	NA	NA	-1.99605	NA	NA
C7_00750W_B	ACB1	ACB1	Protein similar to a region of acyl-coenzyme-A-binding protein; amphotericin B repressed; regulated by Nrg1, Tup1; Hap43-induced	NA	NA	NA	NA	-1.99	-2.13	NA
C1_11660W_B	GAD1	GAD1	Putative glutamate decarboxylase; alkaline, macrophage-downregulated gene; amphotericin B induced; induced by Mnl1 under weak acid stress; stationary phase enriched protein; rat catheter biofilm repressed	NA	-1.64968	NA	NA	-1.96869	NA	NA
C1_11180C_B	snR64		C/D box small nucleolar RNA (snoRNA)	NA	NA	NA	NA	-1.95441	NA	NA
C2_01250W_B	orf19.1999		Protein of unknown function; transcript detected on high-resolution tiling arrays	-1.80029	NA	NA	NA	-1.94638	NA	NA
C2_02860W_B	SUR2	SUR2	Putative ceramide hydroxylase; predicted enzyme of sphingolipid biosynthesis; regulated by Tsa1, Tsa1B under H2O2 stress conditions; Spider and flow model biofilm induced	-2.18923	-2.01308	NA	NA	-1.93903	NA	NA
C7_03190C_B	orf19.5137		Protein of unknown function; regulated by Sef1, Sfu1, Hap43; Spider biofilm repressed	NA	-2.49613	NA	NA	-1.93436	NA	NA
C4_01530C_B	ERG251		C-4 sterol methyl oxidase; role in ergosterol biosynthesis; Hap43-induced; ketoconazole-induced; amphotericin B, caspofungin repressed; possibly essential gene, disruptants not obtained by UAU1 method; Spider biofilm repressed	-2.25544	-2.88101	-1.63997	-2.48199	-1.93	NA	-1.53
C1_06870C_B	orf19.6222.1		Ortholog of C. parapsilosis CDC317 : CPAR2_208910, Candida tenuis NRRL Y-1498 : CANTEDRAFT_114047, Debaryomyces hansenii CBS767 : DEHA2D14388g and Pichia stipitis Pignal : PICST_37629	NA	NA	NA	NA	-1.93	-1.87	-1.94
C2_01930C_B	orf19.1505	YBR138C	Ortholog(s) have cytoplasm localization	NA	NA	NA	NA	-1.93	-2.37	-2.35
CR_00970W_B	ATO9		Putative fungal-specific transmembrane protein	NA	NA	NA	NA	-1.92	-2.02	NA
C4_01360W_B	PGA53		GPI-anchored cell surface protein of unknown function; greater mRNA abundance observed in a cyr1 homozygous null mutant than in wild type	NA	NA	NA	NA	-1.91	-1.92	-1.89
C6_01110W_B	FAD2		Delta-12 fatty acid desaturase, involved in production of linoleic acid, which is a major component of membranes	NA	-1.9083	NA	NA	-1.9	-1.82	NA
C2_07900W_B	GDH2	GDH2	Putative NAD-specific glutamate dehydrogenase; fungal-specific; transcript regulated by Nrg1, Mig1, Tup1, and Gcn4; stationary phase enriched protein; flow model biofilm induced; Spider biofilm induced	NA	NA	NA	NA	-1.9	-1.77	-1.7
C3_04090W_B	SBP1	SBP1	Similar to RNA binding proteins; downregulated upon adherence to polystyrene; stationary-phase enriched protein	NA	NA	NA	NA	-1.87342	NA	NA
C1_10820C_B	orf19.2335	APE4	Putative aspartyl aminopeptidase; stationary phase enriched protein; mutation confers hypersensitivity to 5-fluorouracil (5-FU); Hog1-induced; planktonic growth-induced; rat catheter and Spider biofilm repressed	-1.65256	-2.11528	NA	NA	-1.87159	NA	NA
C5_00660C_B	ERG11	ERG11	Lanosterol 14-alpha-demethylase; cytochrome P450 family; role in ergosterol biosynthesis; target of azole antifungals; may contribute to drug resistance; azole or flow model biofilm induced; drug treated biofilm induced; hypoxia regulated	-1.63758	-2.62195	NA	NA	-1.85085	NA	NA
C2_00100C_B	PGA52	YJL171C	GPI-anchored cell surface protein of unknown function; Hap43p-repressed gene; fluconazole-induced; possibly an essential gene, disruptants not obtained by UAU1 method	NA	NA	NA	NA	-1.82957	NA	NA
C2_01380W_B	PLB4.5		Phospholipase B; Hog1-induced; regulated by Ssn6; putative GPI-anchor; repressed during cell wall regeneration; clade-associated gene expression; Hap43-induced; rat catheter and Spider biofilm repressed	-2.08624	-3.23345	NA	NA	-1.82097	NA	NA
C3_02680C_B	SLD1		Sphingolipid delta-8 desaturase; catalyzes desaturation at C8 in the long-chain base moiety of ceramides in glucosylceramide synthesis, important for virulence; ketoconazole and hypoxia induced; Hap43-repressed; Spider biofilm induced	-1.62856	-1.78834	NA	NA	-1.81161	NA	NA
C7_03830C_B	orf19.7199	YBR137W	Ortholog(s) have role in posttranslational protein targeting to membrane and TRC complex, nucleus localization	NA	NA	NA	NA	-1.79059	NA	NA
CR_02220C_B	OPT3	OPT2	Oligopeptide transporter; transcript induced by macrophage phagocytosis, BSA or peptides; fluconazole-induced; induced by Rim101 at pH 8; virulence-group-correlated expression; Hap43-repressed; Spider biofilm induced	-3.90087	-4.50334	-1.54978	-2.3593	-1.78892	NA	NA
C2_06690C_B	PEX22		Putative peroxin	NA	-1.78966	NA	NA	-1.78112	NA	NA
C7_00700W_B	CYB5	CYB5	Cytochrome b(5); ortholog of S. cerevisiae Cyb5; induced in high iron; fluconazole-induced; shows colony morphology-related gene regulation by Ssn6; mutants are viable	NA	NA	NA	NA	-1.77	-1.69	NA
C5_04300C_B	orf19.3915	DUG1	Putative metallodipeptidase; protein present in exponential and stationary growth phase yeast; Hog1-induced; Hap43-repressed; sumoylation target; Spider biofilm repressed	NA	NA	NA	NA	-1.76883	NA	NA
CR_01860W_B	OPT9		Probable pseudogene similar to fragments of OPT1 oligopeptide transporter gene; decreased expression in hyphae compared to yeast-form cells; transcriptionally induced upon phagocytosis by macrophage	-3.30928	-3.88772	NA	NA	-1.76235	NA	NA
C1_08460C_B	UPC2	UPC2	Zn2-Cys6 transcript factor; regulator of ergosterol biosynthetic genes and sterol uptake; binds ERG2 promoter; induced by ergosterol depletion, by azoles, anaerobicity; macrophage/pseudohyphal-repressed; flow model biofilm induced	-2.90747	-2.81162	NA	NA	-1.75278	NA	NA
CR_01850C_B	orf19.2583.2		Pseudogene; formerly an ORF Predicted by Annotation Working Group	-3.13372	-3.93792	NA	NA	-1.75172	NA	NA
C6_01910W_B	ADK1	ADK1	Putative adenylate kinase; repressed in hyphae; macrophage-induced protein; adenylate kinase release used as marker for cell lysis; possibly essential (UAU1 method); flow model biofilm induced; rat catheter and Spider biofilm repressed	NA	NA	NA	NA	-1.74796	NA	NA
C4_01200C_B	AAT22		Aspartate aminotransferase; nitrogen metabolism; similar but not orthologous to S. cerevisiae Aat2; clade-associated gene expression; protein levels decrease in stationary phase yeast; mutant is viable; flow model biofilm repressed	NA	NA	NA	NA	-1.73	-1.92	NA
C4_01160W_B	CRD2		Metallothionein; for adaptation to growth in high copper; basal transcription is cadmium-repressed; Ssn6 regulated; complements copper sensitivity of an S. cerevisiae cup1 mutant; regulated by Sef1, Sfu1, and Hap43; Spider biofilm induced	NA	NA	NA	1.91788	-1.72731	NA	NA
CR_09160C_B	ERG13	ERG13	3-hydroxy-3-methylglutaryl coenzyme A synthase; ergosterol biosynthesis; sumoylation target; Tn mutation affects filamentation; amphotericin B, caspofungin repressed; exponential, stationary growth phase expressed; Spider biofilm repressed	NA	NA	NA	NA	-1.7195	NA	NA
CR_01840W_B	orf19.2583.1		Pseudogene; formerly an ORF Predicted by Annotation Working Group	-3.33855	-3.70277	NA	NA	-1.71602	NA	NA
C2_04230W_A	BAT21	BAT2	Putative branched chain amino acid aminotransferase; regulated by Gcn4, Gcn2; induced in response to amino acid starvation (3-aminotriazole treatment); early-stage flow model biofilm formation	NA	NA	NA	NA	-1.7	NA	NA
CR_04060C_B	DAP1	DAP1	Similar to mammalian membrane-associated progesterone receptors involved in DNA damage response; induced in core stress response; Hog1 regulated; clade-associated expression; Hap43-repressed	-2.72591	-2.98021	NA	NA	-1.69713	NA	NA
C2_01000W_B	HGT7		Putative MFS glucose transporter; glucose, fluconazole, Snf3 induced, expressed at high glucose; 20 member C. albicans glucose transporter family; 12 TM regions predicted; flow model biofilm induced; Spider biofilm repressed	NA	-1.60493	-2.46884	NA	-1.69	-2.83	NA
CR_06340C_B	PGI1	PGI1	Glucose-6-phosphate isomerase; enzyme of glycolysis; antigenic; Efg1-regulated; induced upon adherence to polystyrene; repressed by phagocytosis, human neutrophils; flow model biofilm induced; rat catheter and Spider biofilm repressed	NA	NA	NA	NA	-1.6868	NA	NA
C5_01800C_B	HIP1		Similar to amino acid permeases; alkaline, flucytosine induced; regulated by Plc1, Gcn2 and Gcn4; fungal-specific; Spider biofilm induced	NA	NA	NA	NA	-1.66337	NA	NA
C1_04400C_B	APE2	APE2	Neutral arginine, alanine, leucine specific metallo-aminopeptidase; purified from cell wall/intracellular fractions; protein repressed during mating; Hog1, farnesol-induced; may be essential (UAU1 method); rat catheter biofilm repressed	NA	NA	NA	NA	-1.66072	NA	NA
C2_02930C_B	CAWG_04060	ETT1	Ortholog of S. cerevisiae Ett1, a nuclear protein that inhibits replication of Brome mosaic virus; early-stage flow model biofilm induced	-1.75008	-2.42794	NA	-1.72065	-1.63586	NA	NA
CR_07890W_B	EFG1	SOK2	bHLH transcription factor; required for white-phase cell type, RPMI and Spider biofilm formation, hyphal growth, cell-wall gene regulation; roles in adhesion, virulence; Cph1 and Efg1 have role in host cytokine response; binds E-box	NA	NA	NA	NA	-1.63342	NA	NA
C2_07420W_B	orf19.1889	SHB17	Putative phosphoglycerate mutase family protein; stationary phase enriched protein; early-stage flow model biofilm induced; Spider biofilm repressed	NA	NA	NA	NA	-1.63103	NA	NA
C4_02410C_B	AHP1	AHP1	Ortholog of Candida albicans WO-1 : CAWG_01228	-2.0055	-3.28185	-2.80685	-2.97205	-1.63	-2.43	NA
CR_02020C_B	OPT1	OPT1	Oligopeptide transporter; transports 3-to-5-residue peptides; alleles are distinct, one has intron; suppresses S. cerevisiae ptr2-2 mutant defects; induced by BSA or peptides; Stp3p, Hog1p regulated; flow model biofilm induced	-3.30958	-4.04053	NA	NA	-1.61962	NA	NA
C2_01430W_B	APT1	APT1	Adenine phosphoribosyltransferase; flucytosine induced; repressed by nitric oxide; protein level decreased in stationary phase yeast cultures	NA	NA	NA	NA	-1.60802	NA	NA
C2_02940W_B	MET1	MET1	Putative uroporphyrin-3 C-methyltransferase, methionine biosynthesis enzyme; upregulated by human whole blood or polymorphonuclear (PMN) cells; Hog1p-induced; fungal-specific (no human or murine homolog); Hap43p-repressed	-3.0642	-3.38936	NA	NA	-1.6	1.58	NA
C1_02590C_B	SNZ1	SNZ1	Stationary phase protein; vitamin B synthesis; induced byyeast-hypha switch, 3-AT or in azole-resistant strain overexpressing MDR1; soluble in hyphae; regulated by Gcn4, macrophage; Spider biofilm induced; rat catheter biofilm repressed	NA	NA	NA	NA	-1.6	NA	-1.64
C2_10350C_B	ACS1	ACS1	Acetyl-CoA synthetase; induced by human neutrophils; fluconazole-repressed; regulated by Nrg1/Mig1; colony morphology-related gene regulation by Ssn6; only in stationary phase cultures; rat catheter biofilm repressed, Spider biofilm induced	-1.9096	-2.19552	NA	NA	-1.59806	NA	NA
CR_09330C_B	orf19.7328		Protein with a Staphylococcal nuclease domain; transcript regulated by Mig1 and Tup1; flow model and Spider biofilm repressed	NA	NA	NA	NA	-1.59091	NA	NA
C4_02360W_B	AMS1	AMS1	Putative alpha-mannosidase; transcript regulated by Nrg1; induced during cell wall regeneration; flow model biofilm induced; Spider biofilm induced	-3.45357	-2.52562	NA	NA	-1.58527	NA	NA
C2_03110W_B	orf19.5785		Protein of unknown function; upregulated in a cyr1 or ras1 null mutant; induced by nitric oxide	-2.54107	-3.87724	NA	-2.34754	-1.58512	NA	NA
C7_03200C_B	orf19.5136	YGR017W	Putative pyridoxamine 5'-phosphate oxidase; planktonic growth and early-stage flow model biofilm induced	-1.55451	NA	NA	NA	-1.55758	NA	NA
C1_13480W_B	HSP70	SSA4	Putative hsp70 chaperone; role in entry into host cells; heat-shock, amphotericin B, cadmium, ketoconazole-induced; surface localized in yeast and hyphae; antigenic in host; farnesol-downregulated in biofilm; Spider biofilm induced	NA	NA	NA	NA	-1.55	-1.6	NA
C5_00930C_B	TFS1	TFS1	Putative carboxypeptidase y inhibitor; transcript regulated upon yeast-hypha switch; colony morphology-related gene regulation by Ssn6	NA	-1.70682	NA	NA	-1.54825	NA	NA
C5_00430W_B	MET14	MET14	Putative adenylylsulfate kinase; predicted role in sulfur metabolism; possibly adherence-induced; protein present in exponential and stationary growth phase yeast; F-12/CO2 biofilm induced	NA	-4.32238	NA	NA	-1.54491	NA	NA
C1_03490W_B	orf19.3051	TDA4	Protein of unknown function; S. pombe ortholog SPAC17A2.02c plays a role in resistance to cadmium; colony morphology-related gene regulation by Ssn6; Spider biofilm repressed	NA	NA	NA	NA	-1.53296	NA	NA
C7_00350C_B	orf19.7085		Protein of unknown function; induced in core stress response; induced by cadmium stress via Hog1; oxidative stress-induced via Cap1; induced by Mnl1 under weak acid stress; macrophage-repressed; rat catheter and Spider biofilm induced	NA	NA	NA	NA	-1.53	NA	-2.02
C1_13190W_B	orf19.4947	YPR098C	Mitochondrial membrane protein of unknown function; Spider biofilm induced	NA	NA	NA	NA	-1.52811	NA	NA
C1_05110C_B	ARO4	ARO4	3-deoxy-D-arabinoheptulosonate-7-phosphate synthase; aromatic amino acid biosynthesis; GCN-regulated; feedback-inhibited by tyrosine if produced in S. cerevisiae Aro3p and Aro4p catalyze same reaction; protein decreases in stationary phase	NA	NA	NA	NA	-1.52	-1.64	-1.91
C7_02610C_B	orf19.2371		Putative Gag protein of retrotransposon Tca2; separated by a stop codon from Pol protein orf19.2372; likely translated as single polyprotein that includes Gag, reverse transcriptase, protease, and integrase; rat catheter biofilm repressed	-1.86689	-2.99037	-2.36661	-2.96369	-1.52	-1.97	NA
CR_02240C_B	OPT2		Oligopeptide transporter; induced upon phagocytosis by macrophage; macrophage/pseudohyphal-repressed after 16h; fluconazole-induced; virulence-group-correlated expression; Hap43-repressed	-3.67414	-4.276	NA	-1.76868	-1.51925	NA	NA
CR_06590C_B	RGS2	RGS2	Protein of RGS superfamily; mutants are viable; rat catheter and Spider biofilm induced	NA	NA	NA	NA	-1.51	-1.8	NA
C4_04110W_B	orf19.5299.1		Protein of unknown function	NA	NA	NA	NA	-1.50038	NA	NA
C2_09140C_B	MET10	MET10	Sulfite reductase; role in sulfur amino acid metabolism; induced by human whole blood or PMNs; Hog1-induced; possibly adherence-induced; flow model, Spider model, F-12/CO2 biofilm induced	NA	-2.29385	NA	NA	-1.50023	NA	NA
C5_03310C_B	PCL1	PCL1	Cyclin homolog; transcript induced by filamentous growth; induced by alpha pheromone in SpiderM medium	NA	NA	NA	NA	1.5	NA	2.21
C3_04660C_B	ARG11	ORT1	Putative ornithine transporter of the mitochondrial inner membrane; induced during the mating process	NA	NA	NA	NA	1.50196	NA	NA
C2_09340W_A	orf19.4095		Ortholog of C. parapsilosis CDC317 : CPAR2_407020, C. dubliniensis CD36 : Cd36_23460, Debaryomyces hansenii CBS767 : DEHA2B02002g and Pichia stipitis Pignal : PICST_31649	NA	NA	NA	NA	1.51	NA	NA
C2_03690C_B	orf19.851		Protein of unknown function; repressed by Rim101; negatively modulates intracellular ATP levels during the development of azole resistance; induced by Ca(2+) in a calcineurin-dependent manner; Spider biofilm induced	NA	NA	NA	NA	1.51347	NA	NA
C3_05980C_B	FAA2		Putative acyl CoA synthetase; expression regulated upon white-opaque switch; rat catheter biofilm induced; Spider biofilm induced	NA	NA	NA	NA	1.51507	NA	NA
CR_05280W_B	CAWG_01857		Ortholog of Candida albicans WO-1 : CAWG_01857	NA	NA	NA	NA	1.51695	NA	NA
C2_04450W_B	orf19.4507		Protein of unknown function; Hap43-repressed; rat catheter biofilm repressed	NA	NA	NA	NA	1.51825	NA	NA
C5_01570C_B	SPO1	SPO1	Protein similar to phospholipase B; fungal-specific (no human or murine homolog)	NA	NA	NA	NA	1.52	NA	1.51
C2_06840W_B	SPR1		Putative GPI-anchored protein; similar but not orthologous to S. cerevisiae Spr1, a sporulation-specific exo-1,3-beta-glucanase; mutant is viable	NA	NA	NA	NA	1.52	NA	2.22
C4_03710C_B	orf19.1307		Predicted membrane protein; rat catheter biofilm induced	NA	NA	NA	NA	1.54	2.08	2.29
C5_04210C_A	MRV4		Protein of unknown function; Spider biofilm induced	NA	NA	NA	NA	1.54	NA	NA
C7_02810W_B	PRX1	PRX1	Thioredoxin peroxidase; transcriptionally induced by interaction with macrophage; fluconazole induced; Fkh2p-downregulated; caspofungin repressed; protein present in exponential and stationary growth phase yeast cultures	NA	NA	NA	NA	1.54	NA	1.51
C7_01770W_B	orf19.6547		Ortholog of Candida albicans WO-1 : CAWG_05528	NA	NA	NA	NA	1.54072	NA	NA
C5_04830W_B	SFL2	MGA1	Transcription factor involved in regulation of morphogenesis; required for filamentous growth, for virulence in RHE model but not in mice; induced upon RHE infection but C. dubliniensis ortholog is not; Spider biofilm induced	NA	NA	NA	NA	1.54965	NA	NA
C1_13590W_B	orf19.4995		Ortholog of C. dubliniensis CD36 : Cd36_12580	NA	NA	NA	NA	1.55	2.35	1.77
C4_01180W_B	orf19.4672		Ortholog of Candida albicans WO-1 : CAWG_03665	NA	NA	NA	NA	1.55555	NA	NA
C3_03980C_B	orf19.2812		Protein of unknown function; Spider biofilm induced	NA	NA	NA	NA	1.56	2.05	2.44
C3_02660W_B	CA0486		Protein of unknown function; Spider biofilm induced	NA	NA	NA	NA	1.57	1.62	1.61
C7_04080C_B	orf19.7167		Putative adhesin-like protein	NA	NA	NA	NA	1.57767	NA	NA
C5_00810C_B	orf19.584		Has domain(s) with predicted heme binding, peroxidase activity and role in oxidation-reduction process, response to oxidative stress	NA	NA	NA	NA	1.58	NA	1.82
C6_02760W_B	orf19.5549		Ortholog of C. dubliniensis CD36 : Cd36_63380 and Candida albicans WO-1 : CAWG_05071	NA	NA	NA	NA	1.58	NA	1.59
C2_09130C_B	IFF6	HBT1	Putative GPI-anchored adhesin-like protein; opaque-specific transcript; macrophage-induced gene; Hap43-repressed gene; Spider biofilm induced	NA	NA	NA	NA	1.58	1.99	2.13
C6_03230W_B	ARG3	ARG3	Putative ornithine carbamoyltransferase; Gcn4-regulated; Hap43-induced; repressed in alkalinizing medium; rat catheter and Spider biofilm induced	NA	NA	NA	NA	1.58	2.04	2.73
C4_06970C_B	ZRT1		Putative zinc transporter; acts with Pra1 in sequestration of zinc from host tissues during infection; hyphal, macrophage-induced; alkaline induced upon adherence to polystyrene; induced in oralpharyngeal candidasis; Spider biofilm induced	NA	NA	NA	NA	1.58467	NA	NA
C2_06060C_B	orf19.4115		Ortholog of Candida albicans WO-1 : CAWG_04349	NA	NA	NA	NA	1.59	1.87	1.6
C4_00640W_B	orf19.4179		Putative adhesin-like protein	NA	NA	NA	NA	1.59	2.08	2.03
C3_00400C_B	orf19.5426	TGL4	Putative patatin-like phospholipase; macrophage-regulated gene; fungal-specific (no human or murine homolog)	NA	NA	NA	NA	1.59	1.98	1.73
C1_05970W_B	orf19.2449		Putative adhesin-like protein; macrophage-induced gene	1.55607	NA	NA	NA	1.5918	NA	NA
CR_00050W_B	INO2		Transcriptional activator that forms a heterodimer with Ino4p; likely regulates genes involved in phosphatidylcholine and phosphatidylinositol biosynthesis, fatty acid beta-oxidation, and peroxisome biogenesis	NA	NA	NA	NA	1.59702	NA	NA
C1_09300C_B	orf19.4789		Has domain(s) with predicted metal ion binding activity	-1.60929	NA	NA	-1.94133	1.6	1.78	NA
C2_02070W_A	SPR3	SPR3	Septin; mutant has no obvious phenotype	NA	NA	NA	NA	1.6	1.55	NA
C4_04190C_B	CAWG_03407		Ortholog of C. parapsilosis CDC317 : CPAR2_402120, C. dubliniensis CD36 : Cd36_43870, Lodderomyces elongisporus NRLL YB-4239 : LELG_04437 and Candida orthopsilosis Co 90-125 : CORT_0E02170	1.90725	2.59501	NA	NA	1.60556	NA	NA
C6_02830W_B	MNN4-4		Mannosyltransferase; transcript upregulated in Ssk1 response regulator mutant or in nik1 null mutant, but not in chk1 or sln1 null mutants; pheromone induced; Spider biofilm induced	NA	NA	NA	NA	1.61	1.74	2.19
C1_02670C_B	orf19.2957		Protein required for transfer of mannosylphosphate; induced by alpha pheromone in SpiderM medium	NA	NA	NA	NA	1.61	NA	1.59
C3_04570C_B	DUR35		Putative urea transporter	NA	NA	NA	NA	1.61	1.78	2.01
C2_02750C_B	orf19.5831		Ortholog of C. parapsilosis CDC317 : CPAR2_212260, C. dubliniensis CD36 : Cd36_17620, Candida orthopsilosis Co 90-125 : CORT_0A11590 and Candida tropicalis MYA-3404 : CTRG_01348	NA	NA	NA	NA	1.61038	NA	NA
CR_05250C_B	FGR13		Protein encoded in retrotransposon Zorro3 with a potential zinc finger; lacks an ortholog in S. cerevisiae; transposon mutation affects filamentous growth	NA	NA	NA	NA	1.62	1.9	1.73
CR_08310C_B	CAWG_02119		S. pombe ortholog SPBC460.04c is a predicted sulfonate/alpha-ketoglutare dioxygenase; induced by nitric oxide; Spider biofilm induced	NA	NA	NA	NA	1.62	1.77	1.64
CR_08780W_B	ITS1		Non-coding region in the 55 copies of rDNA repeat, between RDN18 and RDN58; in S. cerevisiae it is transcribed as part of the 35S precursor that is processed during rRNA maturation to yield 18S, 5.8S, and 25S rRNA species	NA	NA	NA	NA	1.62134	NA	NA
C5_03430W_B	orf19.2638		Protein of unknown function; Spider biofilm induced	NA	1.50501	NA	NA	1.6282	NA	NA
C2_10870W_B	orf19.5370	PFF1	Ortholog(s) have fungal-type vacuole membrane localization	NA	NA	NA	NA	1.63	NA	NA
C5_01670W_B	DAL52		Putative allantoate permease; mutant is viable; similar but not orthologous to S. cerevisiae Dal5	NA	NA	NA	NA	1.63042	1.58	NA
CR_01920W_B	orf19.2591	BIO3	Ortholog(s) have adenosylmethionine-8-amino-7-oxononanoate transaminase activity and role in biotin biosynthetic process	NA	NA	NA	NA	1.64	3.11	2.93
C1_06160W_B	orf19.2429		Protein of unknown function; induced by alpha pheromone in SpiderM medium	NA	NA	NA	NA	1.64	1.78	1.76
C2_04440W_B	orf19.4508		Ortholog of Candida albicans WO-1 : CAWG_04200	NA	NA	NA	NA	1.65	1.68	NA
CR_09940W_B	orf19.7568	SPS4	Ortholog(s) have lipid particle localization	NA	NA	NA	NA	1.65	1.79	1.82
C1_00880W_B	orf19.6017		Protein of unknown function; Spider biofilm induced	NA	NA	NA	NA	1.67	NA	2.01
C7_02920W_B	orf19.5169		Has domain(s) with predicted carbon-nitrogen ligase activity, with glutamine as amido-N-donor activity	NA	NA	NA	NA	1.68	1.98	2.22
C6_02710C_B	SAP6		Secreted aspartyl protease; expressed during hyphal growth, oral carriage, infection; sap4,5,6 triple mutant defective in protein utilization as N source; virulence role affecte by URA3; N-glycosylated; rat catheter biofilm induced	NA	NA	NA	NA	1.68477	NA	NA
C2_08820C_B	SPO11	SPO11	DNA endonuclease; required for genetic recombination between homologous chromosomes during the parasexual cycle; produced in mitotically dividing cells; similar to S. cerevisiae Spo11 which functions in recombination during meiosis	NA	NA	NA	NA	1.68871	NA	NA
CR_06500C_B	orf19.716		Protein of unknown function; Hap43-induced; regulated by Nrg1, Tup1; repressed by alpha pheromone in SpiderM medium; Spider biofilm induced; Bcr1-repressed in RPMI a/a biofilms	NA	NA	NA	NA	1.68904	NA	NA
C1_04500W_B	ICL1	ICL1	Isocitrate lyase; glyoxylate cycle enzyme; required for virulence in mice; induced upon phagocytosis by macrophage; farnesol regulated; Pex5-dependent peroxisomal localization; stationary phase enriched; rat catheter, Spider biofilm induced	NA	NA	NA	NA	1.69	2.24	NA
C3_04000C_B	CTN3	YAT2	Peroxisomal carnitine acetyl transferase; no obvious metabolic, hyphal, virulence defects in Ura+ strain; induced by macrophage engulfment, hyphal growth, starvation, nonfermentable carbon sources; rat catheter, Spider biofilm induced	-1.6853	-1.75064	NA	NA	1.69	2.07	2
C5_04190W_B	MRV2	YDL218W	Protein of unknown function; repressed by fluphenazine treatment or in an azole-resistant strain that overexpresses CDR1 and CDR2; Spider biofilm induced	2.45925	3.00823	NA	NA	1.69	NA	-1.68
C6_00810C_B	orf19.3643		Protein of unknown function; Hap43-repressed gene	NA	NA	NA	NA	1.69975	NA	NA
C3_05640W_B	orf19.6999		Predicted oxidoreductase; rat catheter biofilm repressed	NA	NA	NA	NA	1.7	2.04	1.96
C4_00920C_B	orf19.4702		Possible similarity to mutator-like element (MULE) transposase; flow model biofilm induced; expression regulated during planktonic growth	NA	NA	NA	NA	1.7019	NA	NA
C1_00050C_B	orf19.6110		Ortholog of Candida albicans WO-1 : CAWG_01361	NA	NA	NA	NA	1.70331	NA	NA
C3_06040W_B	orf19.7385	LEE1	CCCH zinc finger protein; Spider biofilm induced	NA	NA	NA	NA	1.71	1.6	1.97
C4_02190C_B	orf19.4571		CoA-transferase family protein; rat catheter biofilm repressed	NA	NA	NA	NA	1.71	1.9	1.82
C7_01050W_B	orf19.7009		Has domain(s) with predicted catalytic activity, coenzyme binding activity and role in cellular metabolic process	NA	NA	NA	NA	1.71809	NA	NA
C4_02030W_B	RFX2		Transcriptional repressor; regulator of filamentation, response to DNA damage, adhesion, virulence in murine mucosal, systemic infections; RFX domain; regulated by Nrg1, UV-induced; partially complements S. cerevisiae rfx1 mutant defects	1.75817	2.2826	NA	NA	1.71933	NA	NA
C1_13450W_B	HYR1		GPI-anchored hyphal cell wall protein; macrophage-induced; repressed by neutrophils; resistance to killing by neutrophils, azoles; regulated by Rfg1, Efg1, Nrg1, Tup1, Cyr1, Bcr1, Hap43; Spider and flow model biofilm induced	NA	NA	NA	NA	1.72	2.42	1.74
CR_04440C_B	RBR1		Glycosylphosphatidylinositol (GPI)-anchored cell wall protein; required for filamentous growth at acidic pH; expression repressed by Rim101 and activated by Nrg1; Hap43-induced	NA	NA	NA	NA	1.73	2.21	2.22
C3_07240W_B	orf19.6777		Ortholog of Candida albicans WO-1 : CAWG_03032	NA	NA	NA	NA	1.73145	NA	NA
C1_00010W_B	orf19.6115		Dubious open reading frame	NA	NA	NA	NA	1.73179	NA	NA
C6_04150W_B	CAWG_04964		Protein of unknown function; Hap43-repressed gene	NA	NA	NA	NA	1.73245	NA	NA
CR_05270W_B	orf19.1008		Ortholog of Candida albicans WO-1 : CAWG_01856	NA	NA	NA	NA	1.74216	NA	NA
C2_09120C_B	orf19.4070		Ortholog of C. dubliniensis CD36 : Cd36_23270	NA	NA	NA	NA	1.75	2.06	1.75
C2_08580W_B	orf19.3621		Possible pseudogene; similar to Ywp1p; ORF extended upstream from the initiating Met of orf19.3621 has a stop codon in the region corresponding to the Ywp1p signal peptide; disruption causes no apparent phenotype; no expression detected	NA	NA	NA	NA	1.75	1.63	1.76
C1_13440C_B	OFI1		Putative transcription factor with zinc finger DNA-binding motif, involved in regulation of white-opaque switching and filamentous growth	NA	NA	NA	NA	1.7596	1.69	NA
C4_03520C_B	RBT1		Cell wall protein with similarity to Hwp1; required for virulence; predicted glycosylation; fluconazole, Tup1 repressed; farnesol, alpha factor, serum, hyphal and alkaline induced; Rfg1, Rim101-regulated	NA	2.82081	NA	NA	1.76	1.67	NA
CR_09050C_B	orf19.7301		Has domain(s) with predicted DNA binding, nucleic acid binding activity	NA	NA	NA	NA	1.76	1.8	2.43
C7_02000C_B	orf19.6520	YIL166C	Putative allantoate permease; fungal-specific (no human or murine homolog)	NA	NA	NA	-1.64677	1.77	2.36	NA
C1_01500W_B	orf19.3336		Ortholog of Candida albicans WO-1 : CAWG_01228	NA	NA	NA	-1.96584	1.77426	NA	NA
C5_05510C_B	orf19.4055		Protein similar to S. cerevisiae Ybr075wp; transposon mutation affects filamentous growth; clade-associated gene expression	NA	NA	NA	NA	1.78	2.06	NA
C2_07580W_B	orf19.1867		Putative malate permease; induced during macrophage infection; regulated by Gcn2 and Gcn4; putative peroxisome targeting signal; Hap43-repressed; Spider biofilm induced	NA	NA	NA	NA	1.78	NA	NA
C4_04020C_B	orf19.5308		Protein of unknown function; induced by Rgt1	NA	NA	NA	NA	1.78019	NA	NA
C5_03650C_B	CAWG_04738		Protein of unknown function; Hap43-repressed gene	NA	NA	NA	NA	1.79	NA	1.51
C1_07620C_B	PIR32		Cell wall protein, putative structural component of the cell wall; mutation leads to increased chitin content, increased virulence and resistance to stresses; macrophage-induced gene	NA	NA	NA	NA	1.7931	NA	NA
C4_01010C_B	DAG7		Secretory protein; a-specific, alpha-factor induced; mutation confers hypersensitivity to toxic ergosterol analog; fluconazole-induced; induced during chlamydospore formation in C. albicans and C. dubliniensis	NA	NA	NA	NA	1.8	NA	2.1
C2_00460W_B	SAP30		Aspartic-type endopeptidase; involved in degradation of alpha pheromone; functional equivalent of S. cerevisiae Bar1; a-cell specific; induced by alpha pheromone	NA	NA	NA	NA	1.80766	NA	NA
C4_00110C_B	FRP1		Ferric reductase; alkaline-induced by Rim101; iron-chelation-induced by CCAAT-binding factor; fluconazole-repressed; ciclopirox-, hypoxia-, Hap43-induced; colony morphology-related regulation by Ssn6; Spider and flow model biofilm induced	NA	-2.07561	NA	-1.99998	1.81	2.8	1.89
C5_04500W_A	CAWG_04819		Ortholog of Candida albicans WO-1 : CAWG_04819	NA	NA	NA	NA	1.81	NA	NA
C1_09420W_B	LIP2		Secreted lipase; member of a differentially expressed lipase gene family; expressed in alimentary tract, but not oral tissue, during mouse oral infection; may have a role in nutrition and/or in creating an acidic microenvironment	NA	NA	-1.50199	NA	1.81	NA	1.53
C4_06530C_B	XUT1		Putative high-affinity, high-capacity xanthine-uric acid/H+ symporter; similar to A. nidulans UapA; member of the Nucleobase-Ascorbate Transporter/Nucleobase-Cation Symporter (NAT/NCS2) family; rat catheter biofilm induced	NA	NA	NA	NA	1.8145	NA	NA
C1_01740W_B	CTN1	YAT1	Carnitine acetyl transferase; required for growth on nonfermentable carbon sources, not for hyphal growth or virulence in mice; induced in macrophage; macrophage/pseudohyphal-repressed after 16 hr; rat catheter, Spider biofilm induced	NA	NA	NA	NA	1.82	1.57	1.78
CR_07540C_B	orf19.2624		Protein of unknown function; downregulated by fluphenazine treatment or in an azole-resistant strain that overexpresses CDR1 and CDR2	NA	NA	NA	NA	1.82085	NA	NA
C2_02060C_B	FMO1		Putative oxidoreductase; mutation confers hypersensitivity to toxic ergosterol analog, and to amphotericin B	NA	NA	NA	NA	1.83	2.16	NA
C4_04050C_B	RHD3		GPI-anchored yeast-associated cell wall protein; induced in high iron; clade-associated gene expression; not essential for cell wall integrity; fluconazole-repressed; flow model and Spider biofilm repressed	NA	-2.43473	NA	NA	1.84	2.07	3.64
CR_03480W_B	orf19.4391		Ortholog of C. dubliniensis CD36 : Cd36_28730, Candida tropicalis MYA-3404 : CTRG_00749 and Candida albicans WO-1 : CAWG_01683	1.50033	1.67072	NA	NA	1.84	1.76	NA
C5_00510W_B	orf19.938		Ortholog of C. dubliniensis CD36 : Cd36_50520, C. parapsilosis CDC317 : CPAR2_304000, Candida tenuis NRRL Y-1498 : cten_CGOB_00233 and Debaryomyces hansenii CBS767 : DEHA2E12408g	NA	NA	NA	NA	1.84	1.92	1.52
C1_00030C_B	orf19.6113		Protein of unknown function; transcript detected on high-resolution tiling arrays	NA	NA	NA	NA	1.84	2.01	NA
C6_04490W_B	LIP4		Secreted lipase, member of a differentially expressed lipase gene family with possible roles in nutrition and/or in creating an acidic microenvironment; expressed more strongly during mucosal infections than during systemic infections	NA	NA	NA	NA	1.84	1.98	1.82
C2_08890W_B	orf19.217	CMR3	Ortholog(s) have sequence-specific DNA binding activity	NA	NA	NA	NA	1.84255	NA	NA
CR_07260C_B	orf19.6142	MND1	Ortholog(s) have double-stranded DNA binding activity, role in reciprocal meiotic recombination and condensed nuclear chromosome localization	NA	NA	NA	NA	1.8427	NA	NA
C3_03690W_B	orf19.6950	YPQ2	Putative vacuolar membrane transporter for cationic amino acids; Spider biofilm induced	NA	NA	NA	NA	1.84332	NA	NA
C4_02150C_B	orf19.4577	GPB1	Ortholog(s) have GTPase activating protein binding, cAMP-dependent protein kinase inhibitor activity, signal transducer activity	NA	NA	NA	NA	1.85	1.95	2.06
CR_04900C_B	PGA39		Putative GPI-anchored protein	NA	NA	NA	NA	1.86	2.46	NA
C4_01390W_B	HAP3		Predicted CCAAT-binding transcription factor that regulates respiration; Cap2-dependent induction in low iron; opaque specific, alkaline, ciclopirox olamine induced; regulated by Sef1, Sfu1, Hap43; Bcr1-regulated in RPMI a/a biofilms	NA	NA	NA	NA	1.86151	1.61	NA
C1_10430W_B	PHO8		Putative repressible vacuolar alkaline phosphatase; Rim101-induced transcript; regulated by Tsa1, Tsa1B in minimal media at 37 deg; possibly adherence-induced	NA	NA	NA	NA	1.86981	NA	NA
C4_02660W_B	orf19.2734		Protein with a glucose/ribitol dehydrogenase family domain; mutants are viable	NA	NA	NA	NA	1.87546	NA	NA
C3_03450C_B	BMT7		Beta-mannosyltransferase, member of a 9-gene family that includes characterized genes BMT1, BMT2, BMT3, and BMT4 with roles in beta-1,2-mannosylation of cell wall phosphopeptidomannan; downregulated in azole-resistant strain; Hap43p-induced	NA	NA	NA	NA	1.88	2.14	NA
C6_02000W_B	PLB2		Putative phospholipase B; conserved catalytic region; 6 putative N-glycosylation motifs; predicted secretion signal; no GPI anchor predicted; fungal-specific (no human or murine homolog)	NA	NA	NA	NA	1.88175	NA	NA
CR_07220C_B	orf19.6148	NDL1	Homolog of nuclear distribution factor NudE, NUDEL; regulates dynein targeting to microtubule plus ends; flow model biofilm repressed	NA	NA	NA	NA	1.89122	NA	NA
C2_09330C_B	orf19.4094		Ortholog of C. dubliniensis CD36 : Cd36_23450, C. parapsilosis CDC317 : CPAR2_407010, Candida tenuis NRRL Y-1498 : cten_CGOB_00249 and Debaryomyces hansenii CBS767 : DEHA2B01980g	NA	NA	NA	NA	1.89668	NA	NA
C5_03030W_B	orf19.4330		Ortholog of C. dubliniensis CD36 : Cd36_52790, Candida tropicalis MYA-3404 : CTRG_05968 and Candida albicans WO-1 : CAWG_04684	NA	NA	NA	NA	1.89771	NA	NA
C6_01660C_B	orf19.3420		Protein of unknown function; decreased expression in hyphae than in yeast	NA	NA	NA	NA	1.9	NA	1.55
C3_06450W_B	GLG2		Putative self-glucosylating initiator of glycogen synthesis; expression regulated upon white-opaque switch; hypha-induced; Spider biofilm induced	NA	NA	NA	NA	1.9	1.62	NA
CR_04990C_B	orf19.654		Predicted protein only found in C. albicans and C. dubliniensis; highly induced during chlamydospore development	NA	NA	NA	NA	1.90718	NA	NA
C2_04470W_B	ADH3		Putative NAD-dependent (R,R)-butanediol dehydrogenase; regulated by white-opaque switch; induced by nitric oxide independent of Yhb1; Spider biofilm induced	NA	NA	NA	NA	1.91305	NA	NA
C4_02210W_B	orf19.4569		Ortholog of C. dubliniensis CD36 : Cd36_42100, Debaryomyces hansenii CBS767 : DEHA2C14850g, Pichia stipitis Pignal : PICST_52615 and Spathaspora passalidarum NRRL Y-27907 : SPAPADRAFT_58608	NA	NA	NA	NA	1.92	2.21	2.37
C2_02550C_B	orf19.1580		Protein of unknown function; Spider biofilm induced	NA	NA	NA	NA	1.92	1.87	NA
C1_06280C_B	UME6		Zn(II)2Cys6 transcription factor; role in hyphal extension, virulence, adherence to plastic; rat catheter biofilm induced; has a long 5'-UTR that regulates translational efficiency and controls transition to filamentous growth	NA	2.54677	NA	NA	1.92248	NA	NA
CR_08270W_B	orf19.6391		Protein of unknown function; transcript upregulated in azole-resistant strain overexpressing MDR1; Spider biofilm induced	NA	NA	NA	NA	1.93	1.61	NA
C2_05900W_B	orf19.5212	CST9	Ortholog(s) have SUMO transferase activity, role in protein sumoylation, reciprocal meiotic recombination, synaptonemal complex assembly and condensed nuclear chromosome localization	NA	NA	NA	NA	1.94	1.79	1.87
C1_04650W_B	DUR3	DUR3	High affinity spermidine transporter; expression is induced by urea; fungal-specific (no human or murine homolog); not required for virulence in a mouse intravenous model	NA	NA	NA	NA	1.94256	1.7	NA
C5_00600C_B	orf19.929		Protein of unknown function; rat catheter biofilm repressed	NA	NA	NA	NA	1.95	2.54	3.02
C3_04730C_B	orf19.5933		Protein of unknown function; transcript induced by benomyl treatment	NA	NA	NA	NA	1.95	2.64	1.8
C2_08360C_B	OPT5		Oligopeptide transporter; fungal-specific (no human or murine homolog); induced by BSA, but not by tetrapeptide or pentapeptide	NA	NA	NA	NA	1.96	2.37	2.23
C1_13430C_B	orf19.4970		Protein of unknown function; Spider biofilm induced	NA	NA	NA	NA	1.96	2.38	2.38
C2_06990W_B	orf19.2253		Protein of unknown function; expression regulated by white-opaque switch; repressed by alpha pheromone in SpiderM medium; Spider biofilm induced	NA	NA	NA	NA	1.96045	NA	NA
CR_05190W_B	orf19.555		Protein similar to S. cerevisiae Cis3p, which has a role cell-wall-related processes; predicted Kex2p substrate; possibly an essential gene, disruptants not obtained by UAU1 method	NA	NA	NA	NA	1.96565	NA	NA
C1_05710C_B	UGA4	UGA4	Putative gamma-aminobutyric acid/polyamine permease; nitrogen catabolite repressed gene, induced in absence of preferred N sources; transcriptionally induced upon phagocytosis by macrophage; gene regulation by nitrogen source requires Gat1p	NA	NA	NA	NA	1.97	NA	1.54
C6_03090W_B	orf19.5592		Ortholog of C. dubliniensis CD36 : Cd36_63980, Candida tenuis NRRL Y-1498 : CANTEDRAFT_115187, Candida tropicalis MYA-3404 : CTRG_02719 and Candida albicans WO-1 : CAWG_05060	NA	NA	NA	NA	1.98	2.21	NA
C6_02890C_B	HPD1		3-hydroxypropionate dehydrogenase; involved in degradation of toxic propionyl-CoA; rat catheter and Spider biofilm induced	NA	NA	NA	-1.60839	1.99897	NA	NA
C7_00630C_B	orf19.7056		Putative protein of unknown function; transcript is upregulated in clinical isolates from HIV+ patients with oral candidiasis; regulated by Sef1, Sfu1, and Hap43	NA	NA	NA	NA	2.01	2.05	1.91
C2_06070W_B	FAA2-1		Predicted long chain fatty acid CoA ligase; upregulated upon phagocytosis; induced by nitric oxide independent of Yhb1	NA	NA	NA	NA	2.01173	NA	NA
CR_02280W_B	PGA23		Putative GPI-anchored protein of unknown function; Rim101-repressed; Cyr1-regulated; colony morphology-related gene regulation by Ssn6	NA	NA	2.08211	2.45651	2.03	3.55	3.43
C2_04910W_B	orf19.3522		Protein of unknown function; flow model biofilm induced; transcript repressed by ciclopirox olamine	NA	NA	NA	NA	2.03212	NA	NA
CR_01340W_B	orf19.2517		Predicted membrane transporter, member of the drug:proton antiporter (12 spanner) (DHA1) family, major facilitator superfamily (MFS)	NA	NA	NA	NA	2.05	1.82	1.91
C2_00660C_B	SOD4		Cu-containing superoxide dismutase; role in response to host innate immune ROS; regulated on white-opaque switch; ciclopirox olamine induced; caspofungin repressed; SOD1,4,5,6 gene family; yeast-associated; Spider biofilm induced	NA	NA	NA	NA	2.06	1.61	NA
C7_00280W_B	HGT12		Glucose, fructose, mannose transporter; major facilitator superfamily; role in macrophage-induced hyphal growth; detected at germ tube plasma membrane by mass spectrometry; Snf3p-induced; 12 probable transmembrane segments	NA	NA	NA	-1.85545	2.06116	NA	NA
C1_11490C_B	BTA1		Ortholog of C. dubliniensis CD36 : Cd36_10780, C. parapsilosis CDC317 : CPAR2_208080, Candida tenuis NRRL Y-1498 : CANTEDRAFT_120956 and Debaryomyces hansenii CBS767 : DEHA2F24508g	NA	NA	NA	NA	2.07	2.18	1.97
C2_04420W_B	IFA4		Protein of unknown function; oxidative stress-induced via Cap1	NA	NA	NA	NA	2.07	1.6	1.97
CR_03290C_B	IME2	IME2	Putative serine/threonine protein kinase; mutation confers hypersensitivity to amphotericin B	NA	NA	NA	NA	2.07	1.89	1.96
C6_01060C_B	CAN2	CAN1	Basic amino acid permease; arginine metabolism; regulated by Nrg1/Tup1; caspofungin, flucytosine induced; colony morphology-related regulation by Ssn6; Hap43-repressed; rat catheter and Spider biofilm induced; promoter bound by Efg1	NA	NA	NA	-1.69916	2.07	NA	1.76
C7_00290C_B	HGT13		Predicted sugar transporter, involved in glycerol utilization; member of the major facilitator superfamily; 12 transmembrane; gene has intron; oxidative stress-induced via Cap1p; expressed in rich medium, 2% glucose	NA	NA	NA	NA	2.07299	NA	NA
CR_00610W_B	IFF4		Adhesin-like cell surface protein; putative GPI-anchor; null mutant germ tubes show decreased adhesion to plastic substrate; mutants are viable; Hap43-repressed gene	NA	NA	NA	NA	2.08	1.98	1.99
CR_07130C_B	ALK8		Ortholog of Candida albicans WO-1 : CAWG_00885	NA	NA	NA	NA	2.08	2.26	2.57
C7_02010C_B	orf19.6518		Predicted aldehyde dehydrogenase [NAD(P)+]; Spider biofilm induced	NA	NA	NA	NA	2.08	1.77	NA
C1_12020W_B	orf19.5264		Dubious open reading frame	NA	NA	NA	NA	2.08617	NA	NA
C4_00080C_B	orf19.376		Protein of unknown function; Hap43-repressed; Spider biofilm induced	NA	NA	NA	NA	2.09163	NA	NA
C6_03850C_B	IHD1	YFL067W	GPI-anchored protein; alkaline, hypha-induced; regulated by Nrg1, Rfg1, Tup1 and Tsa1, Tsa1B in minimal media at 37; oralpharyngeal candidasis induced ; Spider biofilm induced; regulated in Spider biofilms by Tec1, Efg1, Ndt80, Rob1, Brg1	NA	1.85838	NA	NA	2.09659	NA	NA
C4_00530C_B	orf19.4189		Has domain(s) with predicted hydrolase activity	-1.83376	-1.99772	-2.64896	-2.52822	2.1	NA	1.57
C6_01680C_B	orf19.3418		Has domain(s) with predicted hydrolase activity, acting on carbon-nitrogen (but not peptide) bonds, in linear amidines, metal ion binding activity	NA	NA	NA	NA	2.1	1.95	1.64
C5_04140W_B	orf19.3897		Protein of unknown function; decreased transcription is observed upon fluphenazine treatment or in an azole-resistant strain that overexpresses CDR1 and CDR2; transcription is repressed in response to alpha pheromone in SpiderM medium	NA	NA	NA	NA	2.11	1.98	1.73
C6_04620C_B	NAG4		Putative transporter; fungal-specific; similar to Nag3p and to S. cerevisiae Ypr156Cp and Ygr138Cp; required for wild-type mouse virulence and wild-type cycloheximide resistance; gene cluster encodes enzymes of GlcNAc catabolism	NA	NA	NA	NA	2.11	1.5	NA
C2_10150W_B	orf19.1766		Secreted protein; fluconazole-induced	NA	2.06109	NA	NA	2.12212	NA	NA
C6_03240W_B	orf19.5611	GRE2	Predicted 3-methylbutanol:NAD(P) oxidoreductase and methylglyoxal reductase (NADPH-dependent); role in ergosterol metabolic process; early stage flow model biofilm induced; Spider biofilm induced	NA	NA	NA	NA	2.13	2.16	3.15
C1_10570C_B	orf19.1005		Protein with predicted RNI-like domains; rat catheter biofilm induced	NA	NA	NA	NA	2.13	1.85	1.8
CR_03300C_B	CAWG_01665	YNL134C	Ortholog(s) have aldehyde dehydrogenase (NAD) activity, role in response to furfural and cytoplasm, nucleus localization	NA	NA	NA	NA	2.14	NA	1.55
C3_00050C_B	orf19.5468		Predicted ORF from Assembly 19; removed from Assembly 20; restored based on transcription data; almost identical to orf19.6113, orf19.4055, orf19.5370	NA	NA	NA	NA	2.15	2.32	1.6
C7_02250W_B	orf19.6488		Ortholog of C. dubliniensis CD36 : Cd36_72050, C. parapsilosis CDC317 : CPAR2_301140, Candida tenuis NRRL Y-1498 : CANTEDRAFT_135055 and Debaryomyces hansenii CBS767 : DEHA2E07678g	NA	NA	NA	NA	2.17	NA	1.53
C4_01850C_B	PDC12		Putative pyruvate decarboxylase; fungal-specific (no human or murine homolog)	NA	1.59655	NA	NA	2.17	1.86	NA
CR_03580C_B	orf19.4384.1		Putative MFS transporter; predicted ORF in Assembly 20; removed from Assembly 21; restored based on conservation among several Candida species	NA	NA	NA	NA	2.19	NA	1.64
C1_06610C_B	HAK1		Putative potassium transporter; similar to Schwanniomyces occidentalis Hak1p; amphotericin B induced; induced upon phagocytosis by macrophage; Hap43-repressed; rat catheter biofilm repressed	NA	NA	NA	NA	2.2	2.17	NA
C1_09290C_B	ARG5,6	ARG5,6	Arginine biosynthetic enzyme; processed in S. cerevisiae into 2 polypeptides with acetylglutamate kinase (Arg6) activity and acetylglutamate-phosphate reductase (Arg5) activity; Gcn4 regulated; alkaline repressed; Spider biofilm induced	NA	NA	NA	NA	2.21	2.77	3.12
CR_06870C_B	orf19.1844		Protein similar to ferric reductase Fre10p	NA	NA	NA	NA	2.21	2.01	1.78
C6_04230W_B	orf19.1080		Ortholog of C. dubliniensis CD36 : Cd36_64900, C. parapsilosis CDC317 : CPAR2_600390, Pichia stipitis Pignal : PICST_30726 and Candida guilliermondii ATCC 6260 : PGUG_04023	NA	NA	NA	NA	2.21775	NA	NA
C5_03880C_B	orf19.1106		Protein with Mob2p-dependent hyphal regulation; fluconazole-induced	NA	NA	NA	NA	2.21976	NA	NA
C2_02530W_B	orf19.1577	GAT2	Has domain(s) with predicted sequence-specific DNA binding, transcription factor activity, sequence-specific DNA binding, zinc ion binding activity and role in regulation of transcription, DNA-templated	NA	NA	NA	NA	2.23	2.2	1.71
C3_04210W_B	orf19.5863		Ortholog of C. dubliniensis CD36 : Cd36_84160, Candida tenuis NRRL Y-1498 : cten_CGOB_00085, Debaryomyces hansenii CBS767 : DEHA2B08404g and Pichia stipitis Pignal : PICST_67031	NA	NA	NA	NA	2.23727	NA	NA
C7_02150C_B	ECM42	ARG7	Ornithine acetyltransferase; Gcn2, Gcn4-regulated; clade-specific gene expression; possibly essential gene, disruptants not obtained by UAU1 method; Spider biofilm induced	NA	NA	NA	NA	2.24	2.48	2.67
C4_01070W_B	HGT17		Putative MFS family glucose transporter; 20 members in C. albicans; 12 probable membrane-spanning segments; induced at low (0.2%, compared to 2%) glucose in rich media; Spider biofilm induced	-1.98859	-1.74001	NA	NA	2.24	2.94	2.7
C4_01860C_B	orf19.4607		Possible Golgi membrane protein; Hap43-repressed; hypha induced; flow model biofilm induced; Spider biofilm induced	NA	1.66313	NA	NA	2.24005	NA	NA
C5_00540C_B	AGA1		Protein with some similarity to agglutinin subunit; expression regulated upon white-opaque switch; Spider biofilm induced	NA	NA	NA	-1.56859	2.2471	NA	NA
C7_03150W_B	orf19.5140		Protein of unknown function; rat catheter and Spider biofilm induced	NA	NA	NA	NA	2.26	2.67	2.66
C7_04070C_B	orf19.7170		Ortholog of C. dubliniensis CD36 : Cd36_73740, Candida tropicalis MYA-3404 : CTRG_05151 and Candida albicans WO-1 : CAWG_05736	NA	NA	NA	NA	2.28843	NA	NA
C2_06180C_B	FGR12		Protein lacking an ortholog in S. cerevisiae; transposon mutation affects filamentous growth; flow model biofilm induced	NA	NA	NA	-1.71543	2.3	1.8	NA
C5_00530W_B	orf19.936		Ortholog of C. dubliniensis CD36 : Cd36_50530, C. parapsilosis CDC317 : CPAR2_303990, Candida tenuis NRRL Y-1498 : CANTEDRAFT_107934 and Pichia stipitis Pignal : PICST_63283	NA	NA	NA	NA	2.31	1.89	1.51
C2_06340W_B	EFH1		APSES transcription factor; homodimer; minor role in transcriptional regulation vs Efg1; regulates filamentous growth, phenotypic switch; EFG1 and EFH1 genetically interact; expression interferes with mouse intestinal tract colonization	NA	NA	NA	NA	2.32	2.39	2.4
C2_10040W_B	orf19.1778		Dubious open reading frame	NA	NA	NA	NA	2.32	1.74	1.75
C5_00710W_B	IFF8		Putative GPI-anchored adhesin-like protein; decreased transcription is observed in an azole-resistant strain that overexpresses MDR1	NA	NA	NA	NA	2.33	2.55	2.8
C6_03060W_B	PGA60		Putative GPI-anchored adhesin-like protein; hyphal-induced expression	NA	NA	NA	NA	2.33	2.71	2.68
C1_01510W_B	orf19.3337		Protein of unknown function; merged with orf19.3338; rat catheter, flow and Spider model biofilm induced; promoter bound by Bcr1, Efg1, Ndt80, and Rob1; orf19.3338 Bcr1-repressed in RPMI a/a biofilms	NA	1.50408	-1.51391	NA	2.34959	1.55	NA
C2_02230C_B	orf19.1541		Protein with a globin-like domain; repressed by alpha pheromone in SpiderM medium; Spider biofilm induced	NA	NA	NA	NA	2.35	1.95	1.93
C1_07030C_B	RBT4		Pry family protein; required for virulence in mouse systemic/rabbit corneal infections; not filamentation; mRNA binds She3, is localized to hyphal tips; Hap43-induced; in both yeast and hyphal culture supernatants; Spider biofilm induced	NA	NA	NA	NA	2.35	1.6	2.4
C5_04370C_B	PGA37		Putative GPI-anchored protein; Hap43-repressed; Spider biofilm induced	NA	1.66	NA	NA	2.35	1.68	NA
C4_01030W_B	orf19.4685		Dubious open reading frame	NA	NA	NA	NA	2.36	1.58	NA
C7_03140W_B	orf19.5141		Ortholog of Candida albicans WO-1 : CAWG_05647	NA	NA	NA	NA	2.39	1.99	2.22
C4_04790W_B	FAV1	FUS2	Protein with weak similarity to S. cerevisiae Fus2p; induced by alpha pheromone mating factor in MTLa/MTLa opaque cells	NA	NA	NA	NA	2.4	2.64	2.29
C1_05920W_B	orf19.2457		Protein of unknown function; induced during chlamydospore formation in both C. albicans and C. dubliniensis; Spider biofilm induced	NA	2.90256	NA	NA	2.42	1.51	NA
C3_06660C_B	orf19.7455		Ortholog of C. dubliniensis CD36 : Cd36_86630 and Candida tropicalis MYA-3404 : CTRG_05698	NA	NA	NA	NA	2.43	2.14	NA
C4_06900W_B	GST1		Putative glutathione S-transferase; upregulated in the presence of human neutrophils; expression is regulated upon white-opaque switching; increased transcription is observed upon benomyl treatment	NA	NA	NA	NA	2.43	2.12	2.06
C5_04380C_B	orf19.3924		Ortholog of Candida albicans WO-1 : CAWG_04810	NA	NA	-1.54164	NA	2.43333	NA	NA
C5_03050C_B	PGA58		Putative GPI-anchored protein; transcription is positively regulated by Tbf1p	NA	NA	NA	NA	2.45	1.84	1.7
C1_05890W_B	orf19.2460		Protein of unknown function; substrate for Kex2 processing in vitro; repressed by alpha pheromone in SpiderM medium; Spider biofilm induced; Bcr1-repressed in a/a RPMI biofilms	NA	NA	NA	NA	2.46	2.09	2.11
C4_00130W_B	RBT5		GPI-linked cell wall protein; hemoglobin utilization; Rfg1, Rim101, Tbf1, Fe regulated; Sfu1, Hog1, Tup1, serum, alkaline pH, antifungal drugs, geldamycin repressed; Hap43 induced; required for RPMI biofilms; Spider biofilm induced	NA	NA	NA	NA	2.48	3.41	2.77
CR_03450W_B	HXT5		Putative sugar transporter; induced by ciclopirox olamine; Snf3-induced; alkaline repressed; colony morphology-related gene regulation by Ssn6; possibly essential gene	NA	NA	NA	NA	2.49	1.6	1.77
C7_03570W_B	ARG4	ARG4	Argininosuccinate lyase, catalyzes the final step in the arginine biosynthesis pathway; alkaline downregulated; flow model biofilm induced; Spider biofilm induced	NA	NA	NA	NA	2.51	2.96	2.37
C5_01380W_B	CFL5	FRE3	Ferric reductase; induced in low iron; ciclopirox olamine, flucytosine induced; amphotericin B, Sfu1 repressed; Tbf1, Hap43 induced	NA	NA	NA	NA	2.51	2.01	2.51
C1_04870W_B	SAP7		Pepstatin A-insensitive secreted aspartyl protease; self-processing; expressed in human oral infection; Ssn6p-regulated; role in murine intravenous infection; induced during, but not required for, murine vaginal infection; N-glycosylated	NA	1.52	NA	NA	2.51	2.13	1.9
C4_02230C_B	orf19.4567		Catechol 1,2-dioxygenase (1,2-CTD), involved in degradation of aromatic compounds; Spider biofilm induced	NA	NA	NA	NA	2.52	1.8	1.93
C4_06980W_B	PRA1	ZPS1	Cell surface protein that sequesters zinc from host tissue; enriched at hyphal tips; released extracellularly; binds to host complement regulators; mediates leukocyte adhesion and migration; immunogenic in mouse; produced at ambient pH	NA	NA	NA	NA	2.53	2.29	1.75
C3_04450C_B	orf19.5896	YMR244W	Protein of unknown function; induced by alpha pheromone in SpiderM medium	NA	NA	NA	NA	2.57	2.03	NA
C1_04800C_B	orf19.762		Ortholog of C. parapsilosis CDC317 : CPAR2_105580, C. dubliniensis CD36 : Cd36_04550, Lodderomyces elongisporus NRLL YB-4239 : LELG_03202 and Candida orthopsilosis Co 90-125 : CORT_0B06800	NA	NA	NA	NA	2.6	2.64	2.46
C1_02990C_B	XOG1	EXG1	Exo-1,3-beta-glucanase; 5 glycosyl hydrolase family member; affects sensitivity to chitin and glucan synthesis inhibitors; not required for yeast-to-hypha transition or for virulence in mice; Hap43-induced; Spider biofilm induced	1.54224	NA	-1.7183	NA	2.61	1.71	1.98
CR_05940W_B	CEK2		MAP kinase required for wild-type efficiency of mating; component of the signal transduction pathway that regulates mating; ortholog of S. cerevisiae Fus3; induced by Cph1, pheromone; transposon mutation affects filamentous growth	NA	NA	NA	NA	2.61	3.05	2.74
C7_03900W_B	orf19.7192		Ortholog of Candida albicans WO-1 : CAWG_05720	NA	NA	NA	NA	2.61	1.96	NA
C4_04320W_B	FRE10		Major cell-surface ferric reductase under low-iron conditions; 7 transmembrane regions and a secretion signal predicted; Tup1, Rim101, Ssn6, Hog1, caspofungin repressed; ciclopirox olamine induced; rat catheter biofilm induced	NA	NA	NA	NA	2.62	2.27	2.58
C1_10150W_B	WOR1	MIT1	Transcription factor ("master switch") of white-opaque phenotypic switching; required to establish and maintain the opaque state; opaque-specific, nuclear; regulates its own expression; suggested role in regulation of adhesion factors	NA	1.57073	NA	NA	2.62572	NA	NA
CR_06670W_B	CFL11		Protein similar to ferric reductase Fre10p; flucytosine repressed; possibly adherence-induced; possibly an essential gene, disruptants not obtained by UAU1 method; rat catheter biofilm repressed	4.26631	4.4843	NA	NA	2.63	-1.84	-1.95
C5_03520W_B	orf19.6661		Predicted ORF from Assembly 19; removed from Assembly 20; subsequently reinstated in Assembly 21 based on comparative genome analysis	NA	NA	NA	NA	2.65	1.6	1.82
C1_02730W_B	orf19.2962		Protein of unknown function; Spider biofilm induced	NA	NA	NA	NA	2.71	1.87	NA
C2_07790C_B	orf19.2202		Protein of unknown function; induced by alpha pheromone in SpiderM medium	NA	NA	NA	NA	2.74	2.38	2.31
C2_02220C_B	orf19.1539		Protein of unknown function; F-12/CO2 early biofilm induced	NA	NA	NA	NA	2.79	2.45	2.72
C2_04090W_B	orf19.812		Ortholog of C. dubliniensis CD36 : Cd36_18730, C. parapsilosis CDC317 : CPAR2_212510, Candida tenuis NRRL Y-1498 : CANTEDRAFT_135843 and Debaryomyces hansenii CBS767 : DEHA2D06732g	NA	NA	NA	NA	2.84	2.31	1.86
C5_03750W_B	FAV2		Adhesin-like protein; induced by mating factor in MTLa/a opaque cells, in cyr1 null, in filaments; regulated by Nrg1, Rfg1, Tup1, Tec1, Efg1, Ntd80, Rob1, Brg1; induced in oralpharyngeal candidasis; Spider biofilm induced	NA	NA	NA	NA	2.85	2.16	2.18
C5_04220W_B	MRV5		Planktonic growth-induced gene	NA	NA	NA	-1.5473	2.9	2.45	NA
CR_01330W_B	CPA2	CPA2	Putative arginine-specific carbamoylphosphate synthetase; protein enriched in stationary phase yeast cultures; rat catheter biofilm induced; Spider biofilm induced	NA	NA	NA	NA	2.95	2.53	2.55
C6_03570W_B	orf19.5724		Ortholog of C. parapsilosis CDC317 : CPAR2_500910, C. dubliniensis CD36 : Cd36_64110, Candida tenuis NRRL Y-1498 : CANTEDRAFT_115913 and Pichia stipitis Pignal : PICST_32870	NA	NA	NA	NA	2.97	2.08	1.95
C4_02220C_B	ZCF25		Putative Zn(II)2Cys6 transcription factor	NA	NA	NA	NA	2.97	3.56	3.32
C7_03560W_B	orf19.6688		Protein of unknown function; expression decreases by benomyl treatment or in an azole-resistant strain overexpressing MDR1; Spider biofilm induced	NA	NA	NA	-2.0856	2.99	2.92	1.98
C1_14130W_B	FTR1	FTR1	High-affinity iron permease; required for mouse virulence, low-iron growth; iron, amphotericin B, caspofungin, ciclopirox, Hog1p, Sef1p, Sfu1p, and Hap43p regulated; complements S. cerevisiae ftr1 iron transport; Hap43p-repressed	NA	NA	NA	-2.4543	3.01	2.49	NA
C2_04430W_B	orf19.4509		Protein of unknown function	NA	NA	NA	NA	3.02	2.4	2.44
C6_03600C_B	orf19.5728		Putative cytochrome P450; Spider biofilm induced	NA	NA	NA	NA	3.04	2.98	2.21
C4_05730W_B	orf19.1258		Adhesin-like protein; regulated by Tsa1, Tsa1B in minimal media at 37 deg; clade-associated gene expression; induced by alpha pheromone in SpiderM medium; Hap43-induced; Spider biofilm repressed	NA	NA	NA	NA	3.07	1.89	1.98
C4_02180C_B	ZCF26		Zn2-Cys6 transcription factor of unknown function; induced by alpha pheromone in SpiderM medium	NA	NA	NA	NA	3.11	3.2	2.75
C2_05070W_B	FRE9		Ferric reductase; alkaline induced; ciclopirox olamine; Hap43-induced	NA	NA	NA	NA	3.12	2.07	2.35
C4_04070C_B	PGA30		GPI-anchored protein of cell wall	NA	NA	NA	NA	3.13	3.02	3.28
C4_05070C_B	ARG8	ARG8	Putative acetylornithine aminotransferase; Gcn2, Gcn4 regulated; rat catheter biofilm induced; Spider biofilm induced	NA	NA	NA	NA	3.16	3.61	3.66
C7_00480W_B	FGR2		Protein similar to phosphate transporters; transposon mutation affects filamentous growth; expression is regulated upon white-opaque switching	NA	NA	-1.7183	-2.61726	3.2	1.79	NA
C1_06340W_B	orf19.6277		Has domain(s) with predicted phosphatidylinositol binding activity and role in cell communication	NA	2.28975	NA	NA	3.21	2.28	NA
C4_04030W_B	JEN2		Dicarboxylic acid transporter; regulated by glucose repression; induced by Rgt1; disruptants not obtained by UAU1 method; rat catheter and Spider biofilm induced	NA	NA	NA	-1.50628	3.26	2.14	NA
C3_00220W_B	HGT19		Putative MFS glucose/myo-inositol transporter; 20 member family; 12 transmembrane segments, extended N terminus; expressed in rich medium; Hap43, phagocytosis, rat catheter, Spider and flow model biofilm induced	NA	NA	NA	NA	3.26	3.47	4.12
C4_01550C_B	CPA1	CPA1	Putative carbamoyl-phosphate synthase subunit; alkaline repressed; rat catheter, Spider and flow model biofilm induced	NA	NA	NA	NA	3.33	3.61	3.62
C6_00470C_B	FET99		Multicopper oxidase family protein; similar to S. cerevisiae Fet3; does not complement S. cerevisiae fet3 mutant growth under low-iron; iron-repressed; regulated by Tup1, Rim101; flow model biofilm induced; Spider biofilm repressed	NA	NA	NA	-1.81966	3.35	3.3	2
C4_05780C_B	CFL2		Oxidoreductase; iron utilization; Sfu1/Sef1/Hap43/Nrg1/Tup1/Rim101 regulated; alkaline/low iron/fluphenazine/ciclopirox olamine, flucytosine, fluconazole, Spider/flow model/rat catheter biofilm induced; caspofungin/amphotericin B repressed	NA	NA	NA	NA	3.35	2.99	2.76
C3_03990C_B	AAP1		Putative amino acid permease; fungal-specific; possibly essential, disruptants not obtained by UAU1 method; Spider biofilm induced	NA	NA	NA	NA	3.38	3.64	3.71
C6_00730W_B	orf19.3655		Ortholog of C. dubliniensis CD36 : Cd36_60640, C. parapsilosis CDC317 : CPAR2_602930, Candida tenuis NRRL Y-1498 : CANTEDRAFT_115038 and Pichia stipitis Pignal : PICST_31932	NA	NA	NA	NA	3.45	3.71	2.92
C2_03710W_B	orf19.849	MNN4	Ortholog(s) have enzyme activator activity and role in protein N-linked glycosylation, protein O-linked glycosylation	NA	NA	NA	NA	3.62	3.06	3.01
CR_08510W_B	PGA13		GPI-anchored cell wall protein involved in cell wall synthesis; required for normal cell surface properties; induced in oralpharyngeal candidasis; Spider biofilm induced; Bcr1-repressed in RPMI a/a biofilms	3.23613	4.2775	1.71016	2.17001	3.88	2.35	1.77
CR_00620C_B	ARG1	ARG1	Argininosuccinate synthase; arginine synthesis; Gcn4, Rim101 regulated; induced by amino acid starvation (3-AT), benomyl treatment; stationary phase enriched protein; repressed in alkalinizing medium; rat catheter, Spider biofilm induced	NA	NA	NA	NA	4.7	4.84	3.87
C5_01360W_B	CFL4	FRE2	C-terminus similar to ferric reductases; induced in low iron; Sfu1-repressed; ciclopirox olamine induced; colony morphology-related gene regulation by Ssn6; Hap43-repressed; Sef1-regulated	NA	NA	NA	-1.71995	6.99	6.66	6.14
C2_01630W_B	orf19.1473		2-hydroxyacid dehydrogenase domain-containing protein; Hap43-repressed gene; induced by alpha pheromone in SpiderM medium	2.00116	3.03458	NA	NA	NA	NA	-2.5
CR_00360C_B	LEU1	LEU1	3-isopropylmalate dehydratase; antigenic in humans; repressed in hyphae; alkaline repressed; upregulated by human whole blood or PMNs; regulated by Sef1, Sfu1, and Hap43; rat catheter biofilm induced, Spider biofilm repressed	NA	-1.80222	NA	NA	NA	NA	NA
C1_12360C_B	RIB3	RIB3	3,4-Dihydroxy-2-butanone 4-phosphate synthase; homodimeric enzyme of riboflavin biosynthesis; converts ribulose 5-phosphate to L-3,4-dihydroxy-2-butanone 4-phosphate; transcription regulated on yeast-hyphal switch, macrophage interaction	-2.42086	-2.48134	NA	NA	NA	NA	NA
C1_07230W_B	PHO15	PHO13	4-nitrophenyl phosphatase, possible histone H2A phosphatase; involved in regulation of white-opaque switch; hyphal repressed; induced in core stress response; induced by cadmium stress via Hog1; rat catheter and Spider biofilm repressed	-2.72576	-2.59348	NA	NA	NA	NA	NA
C2_06940C_B	ARE2	ARE2	Acyl CoA:sterol acyltransferase; uses cholesterol and oleoyl-CoA substrates; protoberberine derivative drug inhibits enzyme activity; ketoconazole-induced; Hap43-repressed; flow model biofilm induced; Spider biofilm induced	-2.19791	-1.54031	NA	NA	NA	NA	NA
C2_06970W_B	AAH1	AAH1	Adenine deaminase; purine salvage and nitrogen catabolism; colony morphology-related regulation by Ssn6; Hog1, CO2-induced; chlamydospore formation repressed in C. albicans and C. dubliniensis; rat catheter and F-12/CO2 biofilm induced	-2.97538	-2.52979	-2.72317	-2.88198	NA	NA	-1.81
CR_08890C_B	ASR2		Adenylyl cyclase and stress responsive protein; induced in cyr1 or ras1 mutant; stationary phase enriched protein; Spider biofilm induced	NA	NA	NA	-1.51302	NA	NA	NA
CR_08700C_B	ARF1		ADP-ribosylation factor; probable GTPase involved in intracellular transport; one of several C. albicans ADP-ribosylation factors; N-myristoylprotein; substrate of Nmt1; Spider biofilm induced	-1.5324	-1.96833	NA	NA	NA	NA	NA
C5_05050W_B	ADH1		Alcohol dehydrogenase; oxidizes ethanol to acetaldehyde; at yeast cell surface; immunogenic in humans/mice; complements S. cerevisiae adh1 adh2 adh3 mutant; fluconazole, farnesol-induced; flow model biofilm induced; Spider biofilm repressed	-1.56995	-3.01451	-1.7824	-3.7458	NA	NA	-1.55
C1_08330C_B	ADH2	ADH1	Alcohol dehydrogenase; soluble in hyphae; expression regulated by white-opaque switching; regulated by Ssn6; indued by Mnl1 in weak acid stress; protein enriched in stationary phase yeast cultures; Spider biofilm induced	-1.6584	-3.01281	-1.79371	-2.5233	NA	NA	NA
C1_04140W_B	IFD6		Aldo-keto reductase; similar to aryl alcohol dehydrogenases; protein increase correlates with MDR1 overexpression (not CDR1 or CDR2) in fluconazole-resistant clinical isolates; farnesol regulated; possibly essential; Spider biofilm induced	-1.75391	-2.32221	-2.38361	-2.39259	NA	NA	NA
C3_07340W_B	GCY1	GCY1	Aldo/keto reductase; mutation confers hypersensitivity to toxic ergosterol analog; farnesol-repressed; stationary phase enriched protein; flow model biofilm induced; Spider biofilm repressed	-1.54907	-3.54529	NA	NA	NA	NA	NA
C2_01300C_B	MNN24		Alpha-1,2-mannosyltransferase; required for normal cell wall mannan content	NA	NA	NA	NA	NA	-2.5	-1.61
C6_03690W_B	ALS5		ALS family adhesin; highly variable; expression in S. cerevisiae causes adhesion to human epithelium, endothelium or ECM, endothelial invasiveness by endocytosis and, at high abundance, ECM-induced aggregation; can form amyloid fibrils	NA	NA	NA	NA	NA	NA	-2.44
C6_03710W_B	ALS9	FLO1	ALS family cell-surface glycoprotein; expressed during infection of human epithelial cells; confers laminin adhesion to S. cerevisiae; highly variable; putative GPI-anchor; Hap43-repressed	-2.06073	-2.13946	NA	NA	NA	NA	NA
C1_09160W_B	AOX1		Alternative oxidase; low abundance; constitutively expressed; one of two isoforms (Aox1p and Aox2p); involved in a cyanide-resistant respiratory pathway present in plants, protists, and some fungi, absent in S. cerevisiae; Hap43p-repressed	NA	NA	NA	NA	NA	NA	1.55
C5_02790C_B	GAP1		Amino acid permease; antigenic in human/mouse; 10-12 transmembrane regions; regulated by nitrogen source; alkaline, GlcNAc, phagocytosis induced; WT virulence in mice; Spider and flow model biofilm induced	NA	NA	NA	NA	NA	-1.54	-1.69
CR_02920C_B	AQY1	AQY1	Aquaporin water channel; osmotic shock resistance, WT freeze tolerance; virulent in mice; flucytosine repressed; flow model/RPMI/Spider/rat catheter biofilm induced; required for RPMI biofilm formation; Bcr1-induced in a/a RPMI biofilms	-2.49769	-5.99546	-1.82725	-3.56591	NA	NA	NA
CR_06860C_B	ARO10	ARO10	Aromatic decarboxylase; Ehrlich fusel oil pathway of aromatic alcohol biosynthesis; alkaline repressed; protein abundance affected by URA3 expression in CAI-4 strain; Spider biofilm induced	-2.68947	NA	-2.78433	-2.38456	NA	NA	-1.66
C6_00960W_B	CAN1		Basic amino acid permease; complements lysine transport mutation; 10 predicted transmembrane regions, 3 predicted N-glycosylation sites; phagocytosis by macrophages induces transcript; rat catheter, Spider and flow model biofilm induced	NA	-1.60191	NA	NA	NA	NA	NA
C5_00190C_B	FAS1	FAS1	Beta subunit of fatty-acid synthase; multifunctional enzyme; Hap43, fluconazole-induced; amphotericin B, caspofungin repressed; macrophage/pseudohyphal-induced; flow model and Spider biofilm repressed	NA	-1.79246	NA	NA	NA	NA	NA
C4_01170C_B	BMT9		Beta-mannosyltransferase, 9-gene family that includes characterized genes BMT1, BMT2, BMT3, and BMT4 with roles in beta-1,2-mannosylation of cell wall phosphopeptidomannan; regulated by Sef1, Sfu1, Hap43; rat catheter biofilm repressed	NA	NA	NA	NA	NA	NA	1.62
CR_00740C_B	BMT3		Beta-mannosyltransferase; adds 2nd beta-mannose to the acid-stable fraction of cell wall phosphopeptidomannan, elongation of beta-mannose chains on the phosphopeptidomannan acid-labile fraction; Hap43-induced; Spider biofilm induced	2.25511	2.62272	NA	NA	NA	NA	NA
C6_03160C_B	BMT6		Beta-mannosyltransferase; beta-1,2-mannosylation of phospholipomannan; member of a 9-member family including Bmt1, Bmt2, Bmt3, and Bmt4 with roles in mannosylation of cell wall phosphopeptidomannan; flow model biofilm induced	NA	NA	NA	NA	NA	NA	-1.51
C6_03250W_B	BMT4		Beta-mannosyltransferase; for elongation of beta-mannose chains on the acid-labile fraction of cell wall phosphopeptidomannan; 9-gene family member; regulated by Tsa1, Tsa1B; flow model biofilm induced; rat catheter biofilm repressed	NA	NA	NA	NA	NA	-1.89	NA
C1_06130C_B	HAC1	HAC1	bZIP transcription factor; role in unfolded protein response and control of morphology; transcript undergoes atypical splicing at C terminus under ER stress; induced during mating and by caspofungin; mRNA binds She3; Spider biofilm induced	NA	1.57976	NA	NA	NA	-1.51	-1.53
CR_08140W_B	snR65		C/D box small nucleolar RNA (snoRNA)	NA	NA	NA	NA	NA	-1.55	NA
C2_09550C_B	snR68		C/D box small nucleolar RNA (snoRNA)	NA	NA	NA	NA	NA	-1.66	NA
C4_01570C_B	snR72		C/D box small nucleolar RNA (snoRNA)	NA	NA	NA	NA	NA	-1.69	NA
C4_01580C_B	snR73		C/D box small nucleolar RNA (snoRNA)	NA	NA	NA	NA	NA	-1.78	NA
C4_01600C_B	snR75		C/D box small nucleolar RNA (snoRNA)	NA	NA	NA	NA	NA	-1.59	NA
C4_02650C_B	snR79		C/D box small nucleolar RNA (snoRNA)	NA	NA	NA	NA	NA	-1.75	NA
C1_05730W_B	snR39b		C/D box small nucleolar RNA (snoRNA); encoded within the 2nd intron of orf19.2478.1	NA	NA	NA	NA	NA	-1.64	NA
C4_04490C_B	snR18		C/D box small nucleolar RNA (snoRNA); snR18 is encoded within the intron of orf19.3838/EFB1	NA	NA	NA	NA	NA	-1.7	NA
C7_01260W_B	snR24		C/D box small nucleolar RNA (snoRNA); snR24 is encoded within the intron of orf19.6906/ASC1	NA	NA	NA	NA	NA	-1.58	NA
CR_07060C_B	CRZ2		C2H2 transcription factor; crz1 not crz2 null mutation suppresses fluconazole resistance of homozygous cka2 null; Rim101-repressed at pH 8; required for yeast cell adherence to silicone substrate; Spider biofilm induced	NA	1.63872	NA	NA	NA	NA	-1.5
C3_05780C_B	CRZ1	CRZ1	Calcineurin-regulated C2H2 transcription factor; role in maintenance of membrane integrity, azole tolerance; not required for mouse virulence; repressed by low iron; regulates Ca++ influx during alkaline pH response; Spider biofilm induced	2.05081	2.28335	NA	NA	NA	NA	-1.52
C3_01300C_B	NCE103	NCE103	Carbonic anhydrase; converts of CO2 to bicarbonate; essential for virulence in host niches with limited CO2, normal white-opaque switch; Mnl1-induced in weak acid stress; Hap43-induced gene; F-12/CO2, rat catheter, Spider biofilm induced	NA	-1.82496	NA	NA	NA	NA	NA
C4_04530C_B	PHR1		Cell surface glycosidase; may act on cell-wall beta-1,3-glucan prior to beta-1,6-glucan linkage; role in systemic, not vaginal virulence (neutral, not low pH); high pH or filamentation induced; Bcr1-repressed in RPMI a/a biofilm	4.03645	3.98528	3.83695	3.35871	NA	NA	NA
C1_06940C_B	ATC1	ATH1	Cell wall acid trehalase; catalyzes hydrolysis of the disaccharide trehalose; similar to S. cerevisiae vacuolar acid trehalase (Ath1p); Hap43p-repressed gene	-1.77274	-2.1829	NA	NA	NA	NA	NA
CR_03790C_B	KRE1	KRE1	Cell wall glycoprotein; beta glucan synthesis; increases glucan content in S. cerevisiae kre1, complements killer toxin sensitivity; caspofungin induced; Spider/rat catheter/flow model biofilm induced; Bcr1-repressed in RPMI a/a biofilms	2.3665	2.79973	NA	NA	NA	NA	NA
C1_11270W_B	orf19.675		Cell wall protein; induced in core stress response and core caspofungin response; iron-regulated; amphotericin B, ketoconazole, and hypoxia induced; regulated by Cyr1, Ssn6; induced in oralpharyngeal candidasis; Spider biofilm repressed	NA	2.72175	2.04688	1.97644	NA	NA	NA
C4_04080C_B	PGA31		Cell wall protein; putative GPI anchor; expression regulated upon white-opaque switch; induced by Congo Red and cell wall regeneration; Bcr1-repressed in RPMI a/a biofilms	2.37415	2.71598	2.3207	3.03733	NA	NA	NA
C5_04110W_B	SCW11	SCW11	Cell wall protein; repressed in ace2 mutant; repressed in core caspofungin response; induced in high iron; possibly an essential gene, disruptants not obtained by UAU1 method; rat catheter and Spider biofilm repressed	NA	NA	1.72177	NA	NA	NA	NA
CR_09020C_B	CHS2	CHS1	Chitin synthase; nonessential; required for wild-type chitin deposition in hyphae; transcript regulated during dimorphic transition; Chs1 and Chs2, but not Chs3, are inhibited by the protoberberine HWY-289; flow model biofilm repressed	1.59547	1.95411	NA	NA	NA	NA	NA
CR_00180C_B	CHT1		Chitinase; putative N-terminal catalytic domain; has secretory signal sequence; lacks S/T region and N-glycosylation motifs of Chs2p and Chs3p; alkaline downregulated; expression not detected in yeast-form or hyphal cells	NA	NA	NA	NA	NA	NA	1.74
CR_03500W_B	CIT1	CIT1	Citrate synthase; induced by phagocytosis; induced in high iron; Hog1-repressed; Efg1-regulated under yeast, not hyphal growth conditions; present in exponential and stationary phase; Spider biofilm repressed; rat catheter biofilm induced	1.87506	2.44583	NA	1.98246	NA	NA	NA
C1_13780W_B	MYO2	MYO2	Class V myosin; nonessential; sole class V myosin in C. albicans; required for WT actin cytoskeletal polarity, nuclear organization, migration, hyphal growth; conserved myosin ATPase/tail domains; Hap43-induced; flow model biofilm repressed	NA	1.60658	NA	NA	NA	NA	NA
C2_06020W_B	CNT		CNT family H(+)/nucleoside symporter; transports adenosine, uridine, inosine, guanosine, tubercidin; variant alleles for high/low-affinity isoforms; S or G at residue 328 affects specificity; Spider, flow model biofilm induced	NA	NA	NA	NA	NA	NA	-1.54
CR_07290W_B	FRE7		Copper-regulated cupric reductase; repressed by ciclopirox olamine or 17-beta-estradiol; induced by alkaline conditions or interaction with macrophage; Spider biofilm induced	5.09134	5.40044	NA	NA	NA	-5.27	-5.97
C3_04060C_B	HEM13	HEM13	Coproporphyrinogen III oxidase; antigenic; on yeast cell surface, not hyphae; iron-regulated expression; Hap43, macrophage-repressed; farnesol-induced; possibly essential; flow model biofilm induced; rat catheter, Spider biofilm repressed	-3.97313	-3.32046	-3.29154	-3.0495	NA	NA	NA
C2_00680C_B	SOD5		Cu-containing superoxide dismutase; protects against oxidative stress; induced by neutrophils, hyphal growth, caspofungin, osmotic/oxidative stress; oralpharyngeal candidiasis induced; rat catheter and Spider biofilm induced	3.26632	5.28671	NA	NA	NA	-2.57	-5.25
CR_08340W_B	CYS3	CYS3	Cystathionine gamma-lyase; induced by alkaline, amphotericin B, cadmium stress, oxidative stress via Cap1; possibly adherence-induced; Hog1 regulated; reduced levels in stationary phase yeast cells; Spider and flow model biofilm induced	NA	-1.62787	NA	NA	NA	NA	NA
C2_10110W_B	CYC1	CYC1	Cytochrome c; complements defects of S. cerevisiae cyc1 cyc7 double mutant; induced in high iron; alkaline repressed; repressed by nitric oxide; Hap43-dependent repression in low iron; regulated by Sef1, Sfu1	NA	NA	NA	NA	NA	-1.71	NA
CR_02130W_B	ECM4	ECM4	Cytoplasmic glutathione S-transferase; regulated by Nrg1, Tup1; induced in core stress response, in cyr1 or ras1 mutant (yeast or hyphal cells); Tn mutation affects filamentous growth; stationary phase enriched; Spider biofilm induced	NA	-1.65584	NA	NA	NA	NA	NA
C6_03760C_B	SHM2	SHM2	Cytoplasmic serine hydroxymethyltransferase; complements glycine auxotrophy of S. cerevisiae shm1 shm2 gly1-1 mutant; antigenic; farnesol-upregulated in biofilm; stationary-phase enriched protein; rat catheter and Spider biofilm repressed	-1.90106	-1.52277	-2.43428	-1.96489	NA	NA	NA
C7_00110W_B	SOD3		Cytosolic manganese-containing superoxide dismutase; protects against oxidative stress; repressed by ciclopirox olamine, induced during stationary phase when SOD1 expression is low; Hap43-repressed; Spider and flow model biofilm induced	NA	1.56158	NA	NA	NA	NA	-2.49
C2_08130W_B	ARA1	ARA1	D-Arabinose dehydrogenase; dehydro-D-arabinono-1,4-lactone synthesis; active on D-arabinose, L-fucose, L-xylose, L-galactose; inhibited by metal ions, thiol group-specific reagents; induced on polystyrene adherence; Spider biofilm induced	-2.17827	-2.11357	NA	NA	NA	NA	NA
CR_10840C_B	XYL2	SOR2	D-xylulose reductase; immunogenic in mice; soluble protein in hyphae; induced by caspofungin, fluconazole, Hog1 and during cell wall regeneration; Mnl1-induced in weak acid stress; stationary phase enriched; flow model biofilm induced	-2.44072	-4.34575	-2.01748	-2.92038	NA	NA	NA
C3_02150C_B	ERG6	ERG6	Delta(24)-sterol C-methyltransferase, converts zymosterol to fecosterol, ergosterol biosynthesis; mutation confers nystatin resistance; Hap43, GlcNAc-, fluconazole-induced; upregulated in azole-resistant strain; Spider biofilm repressed	NA	-1.7154	NA	NA	NA	NA	NA
C6_02330W_B	orf19.3475		Described as a Gag-related protein; hyphal induced; downregulation correlates with clinical development of fluconazole resistance; repressed by nitric oxide, 17-beta-estradiol, ethynyl estradiol	1.58398	2.29356	NA	NA	NA	-2.42	-2.74
C1_09720W_B	URA1	URA1	Dihydroorotate dehydrogenase; de novo pyrimidine biosynthesis; regulated by yeast-hypha switch, Nrg1/Mig1/Tup1; flow model biofilm induced; rat catheter and Spider biofilm repressed	-2.03059	-2.59288	NA	NA	NA	NA	NA
C1_08010W_B	DPM1	DPM1	Dolichol-phosphate mannose synthase catalytic subunit; filament induced; Tup1-regulated; flow model and rat catheter biofilm repressed	NA	1.66394	NA	NA	NA	NA	NA
C4_01920W_B	DPM3		Dolichol-phosphate mannose synthase subunit, essential for enzyme activity; flow model biofilm repressed	NA	1.57127	NA	NA	NA	NA	NA
C6_00420W_B	DPM2		Dolichol-phosphate mannose synthase subunit, not essential for enzyme activity; flow model and Spider biofilm repressed	NA	1.56292	NA	NA	NA	NA	NA
C1_12460C_B	orf19.69.2		Dubious open reading frame	NA	-1.76988	NA	NA	NA	NA	NA
C1_06140C_B	orf19.2431		Dubious open reading frame, only conserved in Candida dubliniensis; induced by alpha pheromone in SpiderM medium; mRNA binds She3; Spider biofilm induced; flow model biofilm repressed	NA	2.52552	NA	NA	NA	NA	-2.43
C1_01330C_B	DUT1	DUT1	dUTP pyrophosphatase; cell-cycle regulated if expressed in S. cerevisiae; upstream MluI and SCB elements; 17-beta-estradiol, ethynyl estradiol, macrophage induced; decreased in stationary phase yeast; rat catheter, Spider biofilm repressed	1.64827	NA	-1.57478	NA	NA	NA	NA
C2_06880C_B	PRB1		Endoprotease B; regulated by heat, carbon source (GlcNAc-induced), nitrogen, macrophage response, human neutrophils; similar to (does not replace) S. cerevisiae vacuolar B protease Prb1p; flow model biofilm induced; Spider biofilm induced	NA	-1.52028	NA	NA	NA	NA	NA
C1_08500C_B	ENO1	ENO1	Enolase; glycolysis and gluconeogenesis; major cell-surface antigen; binds host plasmin/plasminogen; immunoprotective; Hap43, phagocytosis induced; farnesol-repressed; flow model biofilm induced; Spider biofilm repressed; may be essential	NA	-1.78351	NA	-2.00156	NA	NA	NA
C4_06390W_B	SOU1		Enzyme involved in utilization of L-sorbose; has sorbitol dehydrogenase, fructose reductase, and sorbose reductase activities; NAD-binding site motif; transcriptional regulation affected by chromosome 5 copy number; Hap43p-induced gene	1.54058	NA	NA	NA	NA	-1.58	NA
C3_07810C_B	SEC61	SEC61	ER protein-translocation complex subunit; essential; 10 predicted transmembrane regions; chimeric mutant partially functionally complements S. cerevisiae sec61 defects; Spider biofilm repressed	NA	1.99858	NA	NA	NA	NA	NA
CR_01620C_B	MET6	MET6	Essential 5-methyltetrahydropteroyltriglutamate-homocysteine methyltransferase (cobalamin-independent methionine synthase); antigenic in murine/human systemic infection; heat shock, estrogen, GCN-induced; Spider biofilm repressed	NA	-2.72006	NA	-1.56832	NA	NA	NA
C1_10290W_B	GCA1		Extracellular/plasma membrane-associated glucoamylase; expressed in rat oral infection; regulated by carbohydrates, pH, galactose; promotes biofilm matrix formation; flow model biofilm induced; Bcr1 repressed in RPMI a/a biofilms	-1.72798	-1.78021	-1.82281	-2.01201	NA	NA	NA
C1_08360C_B	OLE1	OLE1	Fatty acid desaturase, essential protein involved in oleic acid synthesis; required for aerobic hyphal growth and chlamydospore formation; subject to hypoxic regulation; fluconazole-induced; caspofungin repressed; Hap43p-induced	NA	-1.52613	NA	NA	NA	NA	NA
CR_07810W_B	YHB5		Flavohemoglobin-related protein; not required for normal NO resistance; predicted globin/FAD-binding/NAD(P)-binding domains but lacks some conserved residues of flavohemoglobins; filament induced; rat catheter and Spider biofilm induced	NA	NA	NA	NA	NA	NA	-1.79
C2_06470W_B	RTA2	RSB1	Flippase; sphingolipid long chain base release; mediates calcineurin-dependent resistance to azoles; stress-associate; Plc1, Ca2+, calcineurin-regulated; ketoconazole, caspofungin induced; Spider biofilm induced; flow biofilm repressed	3.07346	3.71943	2.83751	2.9958	NA	NA	NA
C3_05710W_B	RCT1	YNL208W	Fluconazole-induced protein; Ras1, Cyr1 repressed and Efg1 induced; regulated by Nrg1, Tup1, Tbf1, Ssn6; induced in oralpharyngeal candidasis; rat catheter biofilm repressed	1.58758	2.11952	1.72473	1.9339	NA	NA	NA
CR_05170C_B	FDH1	FDH1	Formate dehydrogenase; oxidizes formate to CO2; Mig1 regulated; induced by macrophages; fluconazole-repressed; repressed by Efg1 in yeast, not hyphal conditions; stationary phase enriched; rat catheter and Spider biofilm induced	-2.53341	-2.80742	NA	NA	NA	NA	NA
C4_01750C_B	FBA1	FBA1	Fructose-bisphosphate aldolase; glycolytic enzyme; antigenic in murine/human infection; regulated by yeast-hypha switch; induced by Efg1, Gcn4, Hog1, fluconazole; phagocytosis-repressed; flow model biofilm induced; Spider biofilm repressed	-1.6812	-3.00685	-1.99346	-3.27294	NA	NA	NA
C2_08790W_B	JEM1	JEM1	Functional homolog of S. cerevisiae Jem1p, which acts with Scj1p and Kar2p (BiP) in protein folding and ER-associated degradation of misfolded proteins, and also has a role in karyogamy; has J domain and 4 tetratricopeptide repeats	NA	1.5788	NA	NA	NA	NA	NA
C1_07880C_B	GCS1	GSH1	Gamma-glutamylcysteine synthetase; glutathione synthesis, required for virulence;induced in low iron, H2O2, Cd, or presence of human neutrophils; possibly adherence-induced; Spider and F-12/CO2 biofilm induced	-1.55289	-1.95591	NA	NA	NA	NA	NA
C2_10660W_B	ASH1	ASH1	GATA-like transcription factor; localizes to daughter cell, hyphal tip cell nuclei; mRNA localization mediated by She3; required for WT virulence and filamentous growth on solid media; Ras1 repressed in yeast, Cyr1 repressed yeast, hyphae	NA	-1.68802	NA	NA	NA	NA	NA
C1_02700C_B	orf19.2959.1		Gene induced by hypoxia and ketoconazole; oral infection upregulated; mutants have reduced capacity to damage oral epithelial cells; Spider biofilm induced	NA	1.97467	1.72177	NA	NA	NA	-1.66
C3_02280C_B	GFA1	GFA1	Glucosamine-6-phosphate synthase, homotetrameric enzyme of chitin/hexosamine biosynthesis; inhibited by UDP-GlcNAc, FMDP, N-acyl peptide, kanosamine-6-P; functional homolog of S. cerevisiae Gfa1p; Cagrowth-phase regulated; catalytic Cys	1.56697	1.81453	NA	1.53825	NA	NA	NA
C4_02990C_B	GST2		Glutathione S transferase; induced by benomyl and in populations of cells exposed to fluconazole over multiple generations; regulated by Nrg1, Tup1; induced by nitric oxide; stationary phase enriched; Spider biofilm induced	NA	-2.40578	NA	-1.57445	NA	NA	NA
C3_00320W_B	RHR2	GPP1	Glycerol 3-phosphatase; roles in osmotic tolerance, glycerol accumulation in response to salt; Spider/flow model biofilm induced; regulated by macrophage, stress, yeast-hyphal switch, pheromone, Gcn4, Hog1, Nrg1, Tup1	-2.82505	-2.94367	-3.19482	-2.84436	NA	NA	NA
C2_10240W_B	GPD1	GPD1	Glycerol-3-phosphate dehydrogenase; glycerol biosynthesis; regulated by Efg1; regulated by Tsa1, Tsa1B under H2O2 stress conditions; Sflow model and Spider biofilm induced	-2.57479	-2.2752	-2.29801	-2.08974	NA	NA	NA
C5_00880C_B	GIT3		Glycerophosphocholine permease; white cell specific transcript; fungal-specific; alkaline repressed; caspofungin, macrophage/pseudohyphal-repressed; flow model biofilm induced; Spider biofilm induced	-2.2604	-1.65247	-3.36241	-2.4396	NA	NA	NA
C5_00870C_B	GIT4		Glycerophosphocholine transporter; fungal-specific (no human or murine homolog); possibly an essential gene, disruptants not obtained by UAU1 method; Hap43p-repressed gene	-2.70366	-1.77224	NA	NA	NA	NA	NA
C2_06590C_B	GIT1	GIT1	Glycerophosphoinositol permease; involved in utilization of glycerophosphoinositol as a phosphate source; Rim101-repressed; virulence-group-correlated expression	-3.85209	-3.87327	-2.71342	-3.22619	NA	1.5	NA
C1_08400C_B	GCV2	GCV2	Glycine decarboxylase P subunit; protein of glycine catabolism; repressed by Efg1; Hog1-induced; induced by Rim101 at acid pH; transcript induced in elevated CO2; stationary phase enriched protein	-4.65379	-2.86123	-5.22296	-3.73097	NA	NA	NA
C1_09080C_B	PGA6		GPI-anchored cell wall adhesin-like protein; induced by high iron; upregulated upon Als2 depletion; mRNA binds She3 and is localized to hyphal tips; Spider biofilm repressed	1.71923	2.63642	NA	2.48272	NA	NA	NA
C4_02900C_B	CRH11	CRH1	GPI-anchored cell wall transglycosylase, putative ortholog of S. cerevisiae Crh1p; predicted glycosyl hydrolase domain; similar to Csf4p and to antigenic A. fumigatus Aspf9; predicted Kex2p substrate; caspofungin-induced	3.21154	3.13002	1.53018	1.77433	NA	NA	NA
C5_02460C_B	ECM331		GPI-anchored protein; mainly at plasma membrane, also at cell wall; Hap43, caspofungin-induced; Plc1-regulated; Hog1, Rim101-repressed; colony morphology-related regulated by Ssn6; induced by ketoconazole and hypoxia	1.94805	3.1924	NA	1.61104	NA	NA	NA
C5_04130C_B	CHT2		GPI-linked chitinase; required for normal filamentous growth; repressed in core caspofungin response; fluconazole, Cyr1, Efg1, pH-regulated; mRNA binds She3 and is localized to yeast-form buds and hyphal tips; Spider biofilm repressed	NA	NA	NA	NA	NA	NA	-1.53
C4_00120W_B	PGA7		GPI-linked hyphal surface antigen; induced by ciclopirox olamine, ketoconazole, Rim101 at pH 8; Hap43, fluconazole; flow model biofilm induced; Spider biofilm induced; required for RPMI biofilm; Bcr1-induced in a/a biofilm	-2.0366	-3.04824	NA	-2.28491	NA	1.82	NA
C2_04610C_B	snR189b		H/ACA box small nucleolar RNA (snoRNA)	NA	-1.59344	NA	NA	NA	NA	NA
C1_07450W_A	snR42a		H/ACA box small nucleolar RNA (snoRNA)	NA	-1.52788	NA	NA	NA	NA	NA
CR_10640W_B	orf19.7648		Has domain(s) with predicted antiporter activity, drug transmembrane transporter activity, role in drug transmembrane transport and membrane localization	NA	NA	NA	NA	NA	1.58	1.53
C6_02660C_B	orf19.5536	AMD2	Has domain(s) with predicted carbon-nitrogen ligase activity, with glutamine as amido-N-donor activity	NA	NA	NA	NA	NA	1.64	NA
C2_10020C_B	orf19.1780		Has domain(s) with predicted catalytic activity	NA	2.13041	NA	NA	NA	NA	-1.92
C2_02640C_B	orf19.1589.1		Has domain(s) with predicted catalytic activity, pyridoxal phosphate binding activity and role in biosynthetic process	NA	-2.36998	NA	NA	NA	NA	NA
C1_12880C_B	orf19.4918		Has domain(s) with predicted DNA binding, nucleic acid binding activity	NA	NA	NA	NA	NA	NA	1.77
C3_02060W_B	orf19.1641		Has domain(s) with predicted hydrolase activity, acting on carbon-nitrogen (but not peptide) bonds, in linear amides activity and role in metabolic process	NA	NA	NA	NA	NA	2.57	2.4
CR_07680C_B	orf19.6282		Has domain(s) with predicted nucleic acid binding, nucleotide binding activity	NA	NA	NA	NA	NA	1.84	1.62
C3_05990C_B	orf19.7380		Has domain(s) with predicted nucleic acid binding, nucleotide binding activity	NA	NA	NA	NA	NA	1.63	NA
C4_05130C_B	ALD6		Has domain(s) with predicted oxidoreductase activity and role in metabolic process	-1.77902	NA	NA	NA	NA	NA	NA
C1_01620C_B	orf19.3352		Has domain(s) with predicted oxidoreductase activity and role in metabolic process	NA	1.53	NA	1.67999	NA	NA	NA
CR_04500C_B	orf19.541		Has domain(s) with predicted oxidoreductase activity, acting on paired donors, with incorporation or reduction of molecular oxygen, 2-oxoglutarate as one donor, and incorporation of one atom each of oxygen into both donors activity	NA	-1.95867	NA	NA	NA	NA	NA
C3_05080W_B	orf19.5978		Has domain(s) with predicted oxidoreductase activity, transferase activity, transferring acyl groups other than amino-acyl groups, zinc ion binding activity and role in oxidation-reduction process	NA	-1.78133	NA	NA	NA	NA	NA
C2_07620W_B	orf19.1863		Has domain(s) with predicted Rho guanyl-nucleotide exchange factor activity, role in regulation of Rho protein signal transduction and intracellular localization	NA	-1.95877	NA	-1.62713	NA	NA	NA
C5_04260W_B	orf19.3910		Has domain(s) with predicted RNA binding, ribonuclease T2 activity	NA	NA	NA	NA	NA	2.13	2.07
C3_06790W_B	TRY6		Helix-loop-helix transcription factor; regulator of yeast form adherence; required for yeast cell adherence to silicone substrate; Spider and F-12/CO2 biofilm induced; repressed by alpha pheromone in SpiderM medium	NA	NA	NA	-1.8056	NA	NA	NA
C4_01100C_B	AGP2	AGP2	Heme oxygenase; utilization of hemin iron; transcript induced by heat, low iron, or hemin; repressed by Efg1; induced by low iron; upregulated by Rim101 at pH 8; Hap43-induced; Spider and flow model biofilm induced	NA	NA	NA	NA	NA	-1.62	NA
C1_00350C_B	HMX1	HMX1	Heme oxygenase; utilization of hemin iron; transcript induced by heat, low iron, or hemin; repressed by Efg1; induced by low iron; upregulated by Rim101 at pH 8; Hap43-induced; Spider and flow model biofilm induced	NA	NA	NA	-1.81341	NA	NA	NA
CR_04510W_B	HXK2	HXK2	Hexokinase II; antigenic in humans; repressed by human neutrophils; Efg1-regulated; fluconazole-induced; gene regulation by Ssn6; present in exponential and stationary growth phase; flow model biofilm induced; Spider biofilm repressed	-2.59488	-2.6641	-4.08729	-2.82193	NA	-1.58	NA
C2_09950W_B	FCY21	FCY2	High affinity, high capacity, hypoxanthine-adenine-guanine-cytosine/H+ symporter; similar to S. cerevisiae Fcy2; mutation confers resistance to 5-fluorocytosine (5-FC); flow model biofilm induced	NA	NA	NA	NA	NA	-1.86	-2.07
C2_01010W_A	HGT8		High-affinity glucose transporter of the major facilitator superfamily; 20 members in the C. albicans glucose transporter family; 12 probable membrane-spanning segments; gene has intron; expressed in rich medium; flow model biofilm induced	NA	NA	NA	NA	NA	NA	1.56
C1_14220C_B	FTR2		High-affinity iron permease; probably interacts with ferrous oxidase; regulated by iron level, ciclopirox olamine, amphotericin B, caspofungin; complements S. cerevisiae ftr1 iron transport defect; Hap43-repressed; Spider biofilm induced	NA	NA	NA	NA	NA	-2.19	-3.16
CR_07070C_B	ALS3		High-affinity iron permease; required for mouse virulence, low-iron growth; iron, amphotericin B, caspofungin, ciclopirox, Hog1p, Sef1p, Sfu1p, and Hap43p regulated; complements S. cerevisiae ftr1 iron transport; Hap43p-repressed	NA	NA	NA	NA	NA	NA	-1.72
C1_11480W_B	PHO84	PHO84	High-affinity phosphate transporter; transcript regulated by white-opaque switch; Hog1, ciclopirox olamine or alkaline induced; caspofungin, stress repressed; upregulated in RHE model; Spider and flow model biofilm induced, Hap43-induced	-1.62717	-1.76399	-1.60303	-1.95074	NA	NA	NA
CR_01400W_B	LYS12	LYS12	Homoisocitrate dehydrogenase; catalyzes 4th step in the alpha-aminoadipate pathway of lysine biosynthesis; clade-associated gene expression; protein level decreases in stationary phase cultures; Spider biofilm repressed	-2.58026	-3.11745	-1.83661	-1.6846	NA	NA	NA
CR_02170W_B	MET2	MET2	Homoserine acetyltransferase; Hap43p-, Gcn4p-regulated; macrophage/pseudohyphal-repressed; not highly biofilm induced, in contrast to many sulfur amino acid metabolic genes; no human or murine homolog; virulence-group-correlated expression	-2.40992	-2.59645	NA	NA	NA	NA	NA
C1_00780C_B	HGC1	CLN2	Hypha-specific G1 cyclin-related protein involved in regulation of morphogenesis, biofilm formation; Cdc28-Hgc1 maintains Cdc11 S394 phosphorylation during hyphal growth; required for virulence in mice; regulated by Nrg1, Tup1, farnesol	2.01977	2.30726	-1.69209	NA	NA	NA	NA
CR_01470W_B	CSP37	OM45	Hyphal cell wall protein; role in progression of mouse systemic infection; predicted P-loop, divalent cation binding, N-glycosylation sites; expressed in yeast and hyphae; hyphal downregulated; stationary-phase enriched; GlcNAc-induced	NA	NA	NA	NA	NA	-2.01	NA
C2_04810W_B	HIS3	HIS3	Imidazoleglycerol-phosphate dehydratase, enzyme of histidine biosynthesis; functionally complements S. cerevisiae his3-1 mutation; hyphal-induced expression; regulated by Gcn2p and Gcn4p; fungal-specific (no human or murine homolog)	NA	NA	NA	1.76747	NA	NA	NA
C2_09220W_B	DDR48	DDR48	Immunogenic stress-associated protein; filamentation regulated; induced by benomyl/caspofungin/ketoconazole or in azole-resistant strain; Hog1, farnesol, alkaline repressed; stationary phase enriched; Spider, flow model biofilm induced	NA	2.89739	NA	2.0562	NA	NA	-1.54
CR_10100C_B	INO1	INO1	Inositol-1-phosphate synthase; antigenic in human; repressed by farnesol in biofilm or by caspofungin; upstream inositol/choline regulatory element; glycosylation predicted; rat catheter, flow model induced; Spider biofilm repressed	3.77411	NA	NA	NA	NA	-3.25	-3.03
C1_10450W_B	GLY1		L-threonine aldolase; complements glycine auxotrophy of S. cerevisiae shm1 shm2 gly1-1 triple mutant; macrophage/pseudohyphal-induced; the GLY1 locus has an RFLP and is triploid in strain SGY269; flow model biofilm induced	NA	NA	-1.65161	NA	NA	-2.4	-2.29
C3_06580W_B	JEN1	JEN1	Lactate transporter; induced by lactic acid, activated by Cat8; alkaline repressed by Rim101; localizes to plasma membrane; Spider biofilm induced	NA	NA	NA	NA	NA	2.01	NA
C1_05560W_B	RIB4	RIB4	Lumazine synthase (6,7-dimethyl-8-ribityllumazine synthase, DMRL synthase); catalyzes the penultimate step in the synthesis of riboflavin; Hap43-induced; rat catheter and Spider biofilm repressed	-1.53903	-1.54759	NA	NA	NA	NA	NA
C1_09690W_B	MLS1	MLS1	Malate synthase; glyoxylate cycle enzyme; no mammalian homolog; regulated upon white-opaque switch; phagocytosis, strong oxidative stress induced; stationary phase enriched; flow model biofilm repressed; rat catheter, Spider biofilm induced	-2.40671	-2.34384	NA	-1.62436	NA	1.88	1.56
C1_13160W_B	PSA2		Mannose-1-phosphate guanyltransferase; Hap43, macrophage-repressed; stationary phase enriched protein; Spider biofilm induced; rat catheter biofilm repressed	-2.4181	-2.2431	NA	NA	NA	NA	NA
C5_04560C_B	CUP1		Metallothionein; involved in copper resistance; copper induced; Spider biofilm induced; flow model biofilm repressed	NA	-2.51019	NA	NA	NA	-1.51	NA
CR_04960C_B	CRG1		Methyltransferase involved in sphingolipid homeostasis, methylates a drug cantharidin; decreased expression in hyphae compared to yeast; expression regulated during planktonic growth; flow model biofilm induced; Hap43-repressed gene	-2.13903	-2.04128	-1.85161	NA	NA	NA	NA
C2_04940C_B	ITR1	ITR2	MFS inositol transporter; uptake of exogenous inositol; 12 transmembrane motifs; expressed in rich medium; fluconazole, caspofungin repressed; possibly essential (UAU1 method); flow model, rat catheter and Spider biofilm induced	1.77175	NA	1.571	NA	NA	NA	NA
C6_03100W_B	SHE3	SHE3	mRNA-binding protein that localizes specific mRNAs to daughter yeast cells and to hyphal tips; required for normal filamentation and host epithelial cell damage; ortholog of S. cerevisiae She3 but target mRNAs differs	NA	1.57407	NA	NA	NA	NA	NA
C3_05220W_B	CDR1	PDR5	Multidrug transporter of ABC superfamily; transports phospholipids in an in-to-out direction; induced by beta-estradiol, progesterone, corticosteroid, or cholesterol; Spider biofilm induced	NA	NA	1.54052	NA	NA	NA	NA
C3_06870W_B	TDH3	TDH3	NAD-linked glyceraldehyde-3-phosphate dehydrogenase; binds fibronectin, laminin; at cell surface; antigenic in infection; farnesol-repressed; stationary phase-enriched; GlcNAc-induced; flow model biofilm induced; Spider biofilm repressed	NA	-1.93127	NA	-2.56	NA	NA	NA
C4_06120W_B	GDH3	GDH3	NADP-glutamate dehydrogenase; Nrg1, Plc1 regulated; hypha, hypoxia, Efg1-repressed; Rim101-induced at pH 8; GlcNAc, ciclopirox, ketoconazole induced; exp and stationary phase protein; Spider biofilm repressed; rat catheter biofilm induced	-2.09941	NA	NA	NA	NA	NA	NA
C6_01180C_B	EBP1		NADPH oxidoreductase; interacts with phenolic substrates (17beta-estradiol); possible role in estrogen response; induced by oxidative, weak acid stress, NO, benomyl, GlcNAc; Cap1, Mnl1 induced; Hap43-repressed; rat catheter biofilm induced	NA	NA	-1.90782	-2.00302	NA	-2.38	-1.93
CR_00560W_B	NTH1	NTH1	Neutral trehalase; hyphal induction in mutant delayed but not reduced overall; not required for virulence in mice; possible regulatory cAMP-dependent phosphorylation at S10,S213; Hap43-repressed gene; Spider biofilm induced	-1.5018	NA	NA	NA	NA	NA	NA
CR_07790C_B	YHB1	YHB1	Nitric oxide dioxygenase; acts in nitric oxide scavenging/detoxification; role in virulence in mouse; transcript activated by NO, macrophage interaction; Hap43, hypha repressed; mRNA binds She3	-3.19497	-2.84259	-3.82217	-1.96983	NA	-1.5	NA
C4_00990W_B	orf19.4690		NRAMP metal ion transporter domain-containing protein; induced by nitric oxide independent of Yhb1; flow model biofilm induced; rat catheter biofilm repressed	NA	1.84288	NA	NA	NA	NA	NA
C7_01560C_B	NUP		Nucleoside permease; adenosine and guanosine are substrates, whereas cytidine, adenine, guanine, uridine, uracil are not; similar to a nucleoside permease of S. pombe; possibly processed by Kex2p	-2.82921	-3.886	-3.03534	-3.43714	NA	NA	NA
C4_00200C_B	MET15	MET17	O-acetylhomoserine O-acetylserine sulfhydrylase; sulfur amino acid synthesis; immunogenic; Hog1, adherence-induced; brown color of mutant in Pb(2+) medium a visual selection; chlamydospore formation induced, F-12/CO2 biofilm induced	NA	-2.80707	NA	-1.72567	NA	NA	NA
CR_02490W_A	OPT4		Oligopeptide transporter; detected at germ tube plasma membrane; transcript inducede during phagocytosis by macrophages; fungal-specific; Hap43-repressed; merged with orf19.2292 in Assembly 20; rat catheter and Spider biofilm induced	-2.21185	-2.5786	NA	NA	NA	NA	NA
C6_03930W_B	OPT8	YGL114W	Oligopeptide transporter; similar to Opt1 and to S. cerevisiae Ygl114wp, but not other OPTs; induced by nitric oxide, amphotericin B; expression of OPT6, 7, 8 does not complement mutants lacking Opt1, Opt2, and Opt3; Spider biofilm induced	-1.72821	-2.20069	NA	NA	NA	NA	NA
C1_08350C_B	orf19.5114.1		Ortholog of C. dubliniensis CD36 : Cd36_02630, C. parapsilosis CDC317 : CPAR2_206910, Candida tenuis NRRL Y-1498 : cten_CGOB_00051 and Pichia stipitis Pignal : psti_CGOB_00173	NA	NA	-1.69209	NA	NA	NA	NA
C1_11680C_B	orf19.1150.1		Ortholog of C. dubliniensis CD36 : Cd36_10990, C. parapsilosis CDC317 : CPAR2_804585, Candida tenuis NRRL Y-1498 : cten_CGOB_00256 and Debaryomyces hansenii CBS767 : DEHA2F10406g	NA	NA	NA	-1.70154	NA	NA	NA
C1_12720C_B	orf19.6350		Ortholog of C. dubliniensis CD36 : Cd36_11890 and Candida albicans WO-1 : CAWG_00170	NA	-2.10785	NA	NA	NA	NA	NA
C2_01460C_B	orf19.1450		Ortholog of C. dubliniensis CD36 : Cd36_16320, Candida tropicalis MYA-3404 : CTRG_01238 and Candida albicans WO-1 : CAWG_03918	NA	NA	NA	NA	NA	1.66	NA
C2_08340C_B	orf19.1349		Ortholog of C. dubliniensis CD36 : Cd36_22470, Candida tropicalis MYA-3404 : CTRG_01829 and Candida albicans WO-1 : CAWG_05920	NA	NA	NA	-1.7027	NA	NA	NA
C2_08400C_B	orf19.1433.1		Ortholog of C. dubliniensis CD36 : Cd36_22550, Candida tropicalis MYA-3404 : CTRG_01836 and Candida albicans WO-1 : CAWG_01505	-2.33515	-1.83926	NA	NA	NA	NA	NA
C2_09420W_B	CAWG_06019		Ortholog of C. dubliniensis CD36 : Cd36_23530, C. parapsilosis CDC317 : CPAR2_406140, Candida tenuis NRRL Y-1498 : CANTEDRAFT_116829 and Debaryomyces hansenii CBS767 : DEHA2B01826g	NA	-1.51975	NA	NA	NA	NA	NA
C3_01060W_B	orf19.2509.1		Ortholog of C. dubliniensis CD36 : Cd36_29340, Spathaspora passalidarum NRRL Y-27907 : spas_CGOB_00040 and Candida albicans WO-1 : CAWG_00248	NA	NA	NA	NA	NA	NA	1.73
CR_07120C_B	orf19.9		Ortholog of C. dubliniensis CD36 : Cd36_32700, C. parapsilosis CDC317 : CPAR2_204280, Candida tenuis NRRL Y-1498 : CANTEDRAFT_113831 and Debaryomyces hansenii CBS767 : DEHA2E03916g	NA	-1.71383	NA	NA	NA	NA	NA
CR_07500W_B	orf19.2620		Ortholog of C. dubliniensis CD36 : Cd36_33120 and Candida albicans WO-1 : CAWG_02046	-1.51002	-1.88699	NA	NA	NA	NA	1.72
C4_03970W_B	orf19.1207		Ortholog of C. dubliniensis CD36 : Cd36_33200 and Candida albicans WO-1 : CAWG_03416	NA	NA	NA	NA	NA	NA	1.89
CR_10310W_B	orf19.7606		Ortholog of C. dubliniensis CD36 : Cd36_35262, Candida tropicalis MYA-3404 : CTRG_05848 and Candida albicans WO-1 : CAWG_02290	NA	NA	NA	NA	NA	1.57	1.61
C4_02330C_B	orf19.2770		Ortholog of C. dubliniensis CD36 : Cd36_42220, C. parapsilosis CDC317 : CPAR2_500340, Debaryomyces hansenii CBS767 : DEHA2G17754g and Pichia stipitis Pignal : PICST_31424	NA	NA	NA	NA	NA	NA	1.68
C4_04040W_B	orf19.5306		Ortholog of C. dubliniensis CD36 : Cd36_43820 and Candida albicans WO-1 : CAWG_03393	NA	NA	NA	NA	NA	NA	1.63
C5_01990W_B	orf19.3172		Ortholog of C. dubliniensis CD36 : Cd36_51840, Candida tropicalis MYA-3404 : CTRG_05315 and Candida albicans WO-1 : CAWG_04584	NA	-1.53405	NA	NA	NA	NA	NA
C5_03810C_B	orf19.1113		Ortholog of C. dubliniensis CD36 : Cd36_53540, Debaryomyces hansenii CBS767 : DEHA2G07854g, Pichia stipitis Pignal : PICST_32162 and Spathaspora passalidarum NRRL Y-27907 : SPAPADRAFT_50795	-2.18654	-2.84813	NA	NA	NA	NA	NA
C6_00400C_A	orf19.1202		Ortholog of C. dubliniensis CD36 : Cd36_60350, C. parapsilosis CDC317 : CPAR2_603550, Candida tenuis NRRL Y-1498 : CANTEDRAFT_114325 and Debaryomyces hansenii CBS767 : DEHA2G04950g	NA	1.54366	NA	NA	NA	NA	NA
C6_03360C_B	orf19.5625		Ortholog of C. dubliniensis CD36 : Cd36_63640, Pichia stipitis Pignal : PICST_32878, Candida guilliermondii ATCC 6260 : PGUG_03423 and Candida tropicalis MYA-3404 : CTRG_02106	NA	-1.89448	NA	NA	NA	NA	NA
C6_03280W_B	orf19.5616		Ortholog of C. dubliniensis CD36 : Cd36_63740, C. parapsilosis CDC317 : CPAR2_503850, Pichia stipitis Pignal : PICST_32045 and Candida guilliermondii ATCC 6260 : PGUG_00070	NA	NA	NA	NA	NA	1.5	NA
C7_01380W_B	orf19.6919		Ortholog of C. dubliniensis CD36 : Cd36_71210, C. parapsilosis CDC317 : CPAR2_702710, Candida tenuis NRRL Y-1498 : CANTEDRAFT_116256 and Debaryomyces hansenii CBS767 : DEHA2E17732g	NA	2.44271	NA	NA	NA	-2.27	-3.42
C7_02140W_B	orf19.6501		Ortholog of C. dubliniensis CD36 : Cd36_71960, Pichia stipitis Pignal : psti_CGOB_00136, Spathaspora passalidarum NRRL Y-27907 : SPAPADRAFT_63786 and Candida tropicalis MYA-3404 : CTRG_05049	NA	NA	NA	NA	NA	NA	1.58
C7_03680W_B	orf19.6703		Ortholog of C. dubliniensis CD36 : Cd36_73260 and Candida albicans WO-1 : CAWG_05699	NA	NA	NA	NA	NA	1.51	NA
C3_01100W_B	orf19.2512		Ortholog of C. dubliniensis CD36 : Cd36_81000, C. parapsilosis CDC317 : CPAR2_103050, Candida tenuis NRRL Y-1498 : CANTEDRAFT_116326 and Debaryomyces hansenii CBS767 : DEHA2G01958g	NA	-1.57591	NA	NA	NA	NA	NA
C3_04310C_B	orf19.5874		Ortholog of C. dubliniensis CD36 : Cd36_84250, C. parapsilosis CDC317 : CPAR2_806160, Candida tenuis NRRL Y-1498 : CANTEDRAFT_137075 and Debaryomyces hansenii CBS767 : DEHA2F11462g	NA	1.68598	NA	1.59043	NA	NA	NA
C5_04690C_B	orf19.3954.1		Ortholog of C. parapsilosis CDC317 : CPAR2_101170, Candida tenuis NRRL Y-1498 : CANTEDRAFT_113855, Debaryomyces hansenii CBS767 : DEHA2G20240g and Pichia stipitis Pignal : psti_CGOB_00174	NA	NA	NA	1.58296	NA	NA	NA
C3_02790W_A	CAWG_02599		Ortholog of C. parapsilosis CDC317 : CPAR2_102150, C. dubliniensis CD36 : Cd36_82780, Pichia stipitis Pignal : psti_CGOB_00155 and Candida orthopsilosis Co 90-125 : CORT_0B03450	NA	1.59127	NA	NA	NA	NA	NA
C2_06630C_B	orf19.36.1		Ortholog of C. parapsilosis CDC317 : CPAR2_104640 and Candida orthopsilosis Co 90-125 : CORT_0B05695	NA	NA	NA	NA	NA	NA	1.9
C4_03370C_B	orf19.3364		Ortholog of C. parapsilosis CDC317 : CPAR2_403360, Debaryomyces hansenii CBS767 : DEHA2D00814g, Pichia stipitis Pignal : PICST_32156 and Candida guilliermondii ATCC 6260 : PGUG_04611	-2.28995	-2.19096	NA	NA	NA	NA	NA
C4_06360C_B	CAWG_03191		Ortholog of C. parapsilosis CDC317 : CPAR2_500750, C. dubliniensis CD36 : Cd36_45850, Pichia stipitis Pignal : PICST_43336 and Candida orthopsilosis Co 90-125 : CORT_0B00900	NA	NA	NA	NA	NA	NA	1.56
C7_02260W_B	orf19.6487		Ortholog of C. parapsilosis CDC317 : CPAR2_808350, C. dubliniensis CD36 : Cd36_72060, Candida orthopsilosis Co 90-125 : CORT_0C00820 and Candida albicans WO-1 : CAWG_05575	1.96708	2.56802	NA	2.24183	NA	NA	NA
C7_02280W_B	orf19.6484		Ortholog of C. parapsilosis CDC317 : CPAR2_808370, C. dubliniensis CD36 : Cd36_72070, Candida orthopsilosis Co 90-125 : CORT_0C00800 and Candida albicans WO-1 : CAWG_05577	3.61513	4.14646	3.10927	4.68386	NA	NA	1.56
C1_13150W_B	CAWG_00134		Ortholog of Candida albicans WO-1 : CAWG_00134	NA	NA	NA	-1.5011	NA	NA	NA
C1_07530W_B	orf19.2800		Ortholog of Candida albicans WO-1 : CAWG_00667	NA	-1.83838	NA	NA	NA	NA	NA
C1_06150W_B	orf19.2430		Ortholog of Candida albicans WO-1 : CAWG_00792	NA	NA	NA	NA	NA	1.79	2.09
C1_05130W_B	orf19.4057		Ortholog of Candida albicans WO-1 : CAWG_00885	NA	NA	NA	-1.50058	NA	NA	NA
CR_00790C_B	orf19.3277		Ortholog of Candida albicans WO-1 : CAWG_01437	NA	-1.56884	NA	-2.04498	NA	NA	NA
C3_01290W_B	orf19.1722		Ortholog of Candida albicans WO-1 : CAWG_02462	NA	-1.76542	NA	NA	NA	NA	NA
C3_03240C_B	orf19.322		Ortholog of Candida albicans WO-1 : CAWG_02670	NA	-1.63065	NA	NA	NA	NA	NA
C3_03700C_A	CAWG_02687		Ortholog of Candida albicans WO-1 : CAWG_02687	NA	NA	NA	NA	NA	1.73	NA
C3_04240C_B	CAWG_02737		Ortholog of Candida albicans WO-1 : CAWG_02737	NA	NA	NA	NA	NA	1.62	1.55
C3_07720C_B	orf19.6715		Ortholog of Candida albicans WO-1 : CAWG_03078	NA	-1.63696	NA	NA	NA	NA	NA
C4_03490C_A	orf19.3376		Ortholog of Candida albicans WO-1 : CAWG_03459	NA	NA	NA	NA	NA	1.57	NA
C4_00980C_B	MRV1		Ortholog of Candida albicans WO-1 : CAWG_03682	NA	2.3069	NA	NA	NA	NA	NA
C2_00670C_B	orf19.2061		Ortholog of Candida albicans WO-1 : CAWG_03846	2.17816	2.86926	NA	NA	NA	-2.27	-3.7
C2_00990W_B	orf19.2024		Ortholog of Candida albicans WO-1 : CAWG_03878	NA	-1.62099	NA	NA	NA	NA	1.51
C5_02950C_A	orf19.4320		Ortholog of Candida albicans WO-1 : CAWG_04676	NA	-1.66639	NA	NA	NA	NA	1.59
C5_04040C_B	orf19.1286		Ortholog of Candida albicans WO-1 : CAWG_04776	NA	NA	NA	NA	NA	1.57	1.68
C7_03460W_B	orf19.1330		Ortholog of Candida albicans WO-1 : CAWG_05678	NA	NA	NA	NA	NA	1.64	NA
C2_07780W_A	orf19.2203		Ortholog of Candida albicans WO-1 : CAWG_05873	NA	NA	NA	NA	NA	1.59	NA
C2_09410W_B	orf19.1599		Ortholog of Candida albicans WO-1 : CAWG_06018	NA	-1.6351	NA	-1.59923	NA	NA	NA
C1_13360C_B	RMP1	RMP1	Ortholog of Rmp1; subunit of RNase MRP subunit that processes pre-rRNA and has a role in cell cycle-regulated degradation of daughter cell-specific mRNAs; rat catheter and Spider biofilm induced	NA	NA	NA	NA	NA	-1.55	NA
C6_00940C_B	orf19.95	PRM5	Ortholog of S. cerevisiae : PRM5, C. dubliniensis CD36 : Cd36_60980, C. parapsilosis CDC317 : CPAR2_603060, Candida tenuis NRRL Y-1498 : CANTEDRAFT_113703 and Debaryomyces hansenii CBS767 : DEHA2F10032g	1.67332	NA	NA	NA	NA	NA	NA
C4_00210W_B	orf19.5646	YPL034W	Ortholog of S. cerevisiae : YPL034W, C. glabrata CBS138 : CAGL0L06996g, C. dubliniensis CD36 : Cd36_40280, C. parapsilosis CDC317 : CPAR2_402170 and Candida tenuis NRRL Y-1498 : CANTEDRAFT_137348	-1.50433	-1.60763	NA	NA	NA	NA	NA
CR_01430W_B	orf19.2529	GPI15	Ortholog of S. cerevisiae Gpa15; involved in the synthesis of glycosylphosphatidylinositol (GPI) anchors; shuman Pig-H, which is also involved in GPI assembly; Spider biofilm induced	-2.43861	-2.02751	NA	NA	NA	NA	NA
C4_00370W_B	HOF1	HOF1	Ortholog of S. cerevisiae Hof1; a protein localized to the bud neck and required for cytokinesis in S. cerevisiae; periodic mRNA expression, peak at cell-cycle G2/M phase; mutant is viable	NA	-2.16839	NA	NA	NA	NA	NA
CR_02820W_B	PGM2	PGM2	Ortholog of S. cerevisiae Pgm2; induced in planktonic culture; Tye7p-regulated; flow model biofilm induced; rat catheter biofilm repressed	-2.25906	-2.20544	-1.82822	NA	NA	NA	NA
C2_07160W_A	SMF12	SMF1	Ortholog of S. cerevisiae Smf1; manganese transporter; Gcn4-regulated; Hap43, alkaline induced; caspofungin repressed; mutants are viable	NA	1.52118	NA	NA	NA	NA	NA
C2_09710C_B	orf19.1381	LSB5	Ortholog of S. cerevisiae/S. pombe Lsb5; predicted role in actin cortical patch localization, actin filament organization, endocytosis; flow model biofilm induced; Spider biofilm repressed	-1.74821	-1.94632	NA	NA	NA	NA	NA
C1_08780W_A	orf19.4736	PHO8	Ortholog(s) have alkaline phosphatase activity, role in nicotinamide nucleotide metabolic process, protein dephosphorylation and extracellular region, fungal-type vacuole membrane localization	-1.52039	NA	NA	NA	NA	NA	NA
C6_01460C_B	orf19.3438	SCJ1	Ortholog(s) have chaperone binding activity, role in ER-associated ubiquitin-dependent protein catabolic process, protein folding in endoplasmic reticulum, response to unfolded protein and endoplasmic reticulum lumen localization	NA	1.56119	NA	NA	NA	NA	NA
C2_09590C_B	orf19.1395	PIC2	Ortholog(s) have copper uptake transmembrane transporter activity, inorganic phosphate transmembrane transporter activity	-1.92185	-2.31507	NA	NA	NA	NA	NA
C1_13600W_B	orf19.4996	YBL029W	Ortholog(s) have cytoplasm, nucleus localization	NA	NA	NA	NA	NA	1.7	NA
C3_02360C_B	orf19.1608		Ortholog(s) have cytosol, nucleus localization	NA	-2.00751	NA	NA	NA	NA	NA
C3_07450C_B	orf19.6744	YMR262W	Ortholog(s) have cytosol, nucleus localization	NA	-2.68081	NA	-2.61869	NA	NA	NA
C3_07360W_B	DLD2	DLD1	Ortholog(s) have D-lactate dehydrogenase (cytochrome) activity, role in aerobic respiration, cellular carbohydrate metabolic process and mitochondrial inner membrane localization	-1.78642	-2.144	NA	NA	NA	2.42	2.34
C6_03550C_B	orf19.5722	NSI1	Ortholog(s) have DNA binding activity	1.52361	1.80474	NA	NA	NA	NA	NA
C4_06150C_B	orf19.2922	HOP2	Ortholog(s) have double-stranded DNA binding activity, role in reciprocal meiotic recombination, synapsis and condensed nuclear chromosome localization	NA	1.64834	NA	NA	NA	1.52	NA
C2_02290C_B	orf19.1547	TPP1	Ortholog(s) have double-stranded DNA binding, polynucleotide 3'-phosphatase activity and role in double-strand break repair	NA	NA	NA	NA	NA	-1.72	-1.67
C3_02530W_B	orf19.242.2	YSY6	Ortholog(s) have endoplasmic reticulum localization	NA	2.19722	NA	1.75734	NA	NA	-1.6
C7_00760C_B	orf19.7043	YLR050C	Ortholog(s) have endoplasmic reticulum localization	-1.73588	NA	NA	NA	NA	NA	NA
C1_02980W_B	GOR1	GOR1	Ortholog(s) have glyoxylate reductase activity, role in glyoxylate catabolic process and cytosol, extracellular region, mitochondrion, nucleus localization	-1.9477	-1.95271	-1.90782	NA	NA	NA	NA
C3_04630W_B	orf19.5921		Ortholog(s) have glyoxysome localization	NA	1.92337	NA	NA	NA	NA	NA
C3_03230C_B	orf19.321	MUP3	Ortholog(s) have L-methionine transmembrane transporter activity and role in methionine import	-2.1549	-1.85328	NA	NA	NA	NA	NA
C1_00810W_B	orf19.6025	ALG13	Ortholog(s) have N-acetylglucosaminyldiphosphodolichol N-acetylglucosaminyltransferase activity and role in dolichol-linked oligosaccharide biosynthetic process	-1.53363	NA	-1.50199	NA	NA	NA	NA
C4_01300W_B	orf19.4657	NEM1	Ortholog(s) have phosphoprotein phosphatase activity and role in negative regulation of phospholipid biosynthetic process, nuclear envelope organization, positive regulation of phosphatidate phosphatase activity, protein dephosphorylation	-1.63856	-2.40493	NA	NA	NA	NA	NA
C2_04280W_B	orf19.792		Ortholog(s) have protein serine/threonine kinase activity, protein serine/threonine/tyrosine kinase activity, protein tyrosine kinase activity	NA	-1.57423	NA	NA	NA	NA	NA
C2_07060W_B	orf19.2261	HSH49	Ortholog(s) have RNA binding activity, role in mRNA splicing, via spliceosome and U2 snRNP, U2-type prespliceosome localization	-1.68371	-2.05234	NA	-1.56186	NA	NA	NA
C2_08160C_B	CAWG_05907	YOP1	Ortholog(s) have role in cellular protein localization, endoplasmic reticulum inheritance, endoplasmic reticulum tubular network organization, nuclear pore complex assembly, vesicle-mediated transport	NA	NA	NA	NA	NA	-1.63	NA
C1_05010C_B	orf19.55	IZH1	Ortholog(s) have role in cellular zinc ion homeostasis and endoplasmic reticulum localization	NA	-1.69797	NA	NA	NA	NA	NA
C1_05030C_A	PSF2	PSF2	Ortholog(s) have role in double-strand break repair via break-induced replication, mitotic DNA replication and GINS complex, cytosol, nuclear chromatin, replication fork protection complex localization	-1.54006	NA	NA	NA	NA	NA	NA
C1_06480C_B	orf19.6264.3	YIP3	Ortholog(s) have role in ER to Golgi vesicle-mediated transport and ER to Golgi transport vesicle, Golgi apparatus, endoplasmic reticulum localization	NA	1.68253	NA	NA	NA	NA	NA
C1_04690C_B	orf19.776	REC8	Ortholog(s) have role in meiotic sister chromatid cohesion, protein localization to chromosome, centromeric region, reciprocal meiotic recombination, synaptonemal complex assembly	NA	-1.69576	NA	NA	NA	NA	NA
C1_04760C_B	SYG1	SYG1	Ortholog(s) have role in signal transduction and Golgi apparatus, endoplasmic reticulum, mitochondrion, plasma membrane localization	-2.49805	-1.92838	NA	NA	NA	2.35	NA
C1_05830W_B	orf19.2468	TMT1	Ortholog(s) have trans-aconitate 3-methyltransferase activity and cytosol, nucleus localization	-1.69864	-3.09309	NA	NA	NA	NA	NA
C2_03040W_B	PLC2		Phosphatidylinositol (PtdIns)-specific phospholipase C (PI-PLC); predicted type 2 membrane protein; role in, and regulated by, filamentation, Nrg1 and Tup1; no mouse systemic virulence role; orf19.5797 and orf19.1586 are almost identical	2.5094	2.99364	NA	1.50459	NA	NA	-1.8
C5_04810W_B	PFK1	PFK1	Phosphofructokinase alpha subinit; activated by fructose 2,6-bisphosphate, AMP, ATP inhibited; activity reduced on hyphal induction; phagocytosis-repressed; fluconazole, flow model biofilm induced; rat catheter and Spider biofilm repressed	-3.01972	-3.69391	-2.8731	-2.93271	NA	NA	NA
C7_01800C_B	PFK2	PFK2	Phosphofructokinase beta subunit; fructose 2,6-bisphosphate, AMP activated; ATP inhibited; phagocytosis, hyphal repressed; fluconazole-induced; stationary-phase enriched; flow model biofilm induced; rat catheter/Spider biofilm repressed	-2.51766	-2.87957	-3.3543	-3.18366	NA	NA	NA
C6_00750C_B	PGK1	PGK1	Phosphoglycerate kinase; localizes to cell wall and cytoplasm; antigenic in murine/human infection; flow model biofilm, Hog1-, Hap43-, GCN-induced; repressed upon phagocytosis; repressed in Spider biofilms by Bcr1, Ndt80, Rob1, Brg1	NA	-2.90339	NA	-2.763	NA	NA	NA
C2_03270W_B	GPM1	GPM1	Phosphoglycerate mutase; surface protein that binds host complement Factor H and FHL-1; antigenic; fluconazole, or amino acid starvation (3-AT) induced, farnesol-repressed; Hap43, flow model biofilm induced; Spider biofilm repressed	NA	-2.22566	NA	-2.34439	NA	NA	NA
C2_09640W_B	PMI1	PMI40	Phosphomannose isomerase; cell wall biosynthesis enzyme; drug target; functional homolog of S. cerevisiae, E. coli phosphomannose isomerase; Gcn4-regulated; induced on adherence to polystyrene, phagocytosis; 3-AT, Spider biofilm repressed	NA	1.73722	NA	NA	NA	NA	NA
C2_02560W_B	orf19.1581		Planktonic growth-induced gene	NA	NA	NA	NA	NA	1.83	NA
C4_03000C_B	orf19.2691		Planktonic growth-induced gene	-2.05688	-2.45187	NA	-2.02148	NA	NA	NA
C6_03170C_B	MDR1	FLR1	Plasma membrane MDR/MFS multidrug efflux pump; methotrexate is preferred substrate; overexpression in drug-resistant clinical isolates confers fluconazole resistance; repressed in young biofilms; rat catheter biofilm induced	1.64129	NA	NA	NA	NA	NA	-1.6
C2_00940W_B	CAWG_03873		Plasma membrane-associated protein; induced in cyr1 or ras1 mutant; induced by hypoxia, ketoconazole and during growth in the mouse cecum; induced in oralpharyngeal candidasis; Spider biofilm induced	NA	NA	1.50832	NA	NA	NA	NA
C7_02600C_B	orf19.2372		Pol protein of retrotransposon Tca2; separated by a stop codon from Gag protein orf19.2371; likely translated as single polyprotein with Gag, reverse transcriptase, protease, and integrase; rat catheter biofilm repressed	NA	-1.86481	-1.68059	-2.13934	NA	NA	NA
C5_04360C_B	orf19.3922	SDT1	Possible pyrimidine 5' nucleotidase; protein present in exponential and stationary growth phase yeast cultures; Hap43p-repressed gene	-1.52873	NA	NA	NA	NA	NA	NA
C3_06470W_B	AAF1		Possible regulatory protein; possible adhesin-like; Glu-rich domain; production in S. cerevisiae increases endothelial cell adherence and flocculence; flow model biofilm, alkaline or caspofungin induced	NA	NA	NA	NA	NA	NA	-1.7
C2_07630C_B	orf19.1862	RTC3	Possible stress protein; increased transcription associated with CDR1 and CDR2 overexpression or fluphenazine treatment; regulated by Sfu1, Nrg1, Tup1; stationary phase enriched protein; Spider biofilm induced	-2.51963	-3.54158	-2.64592	-3.04666	NA	NA	NA
C3_07330W_B	orf19.6758		Predcted glucose 1-dehydrogenase (NADP+); rat catheter biofilm repressed	NA	-1.75659	NA	NA	NA	NA	1.82
C1_10300W_B	MNN12	MNT2	Predicted alpha-1,3-mannosyltransferase activity with a role in protein glycosylation	1.98111	1.76163	NA	NA	NA	NA	NA
C2_02790C_B	orf19.5826		Predicted amino acid transmembrane transporter; rat catheter biofilm repressed	NA	NA	NA	NA	NA	1.96	NA
C1_10550C_B	GCA2		Predicted extracellular glucoamylase; induced by ketoconazole; possibly essential, disruptants not obtained by UAU1 method; promotes biofilm matrix formation; Spider biofilm induced; Bcr1-induced in RPMI a/a biofilms	NA	NA	-1.57478	NA	NA	NA	NA
CR_05750W_B	orf19.6637		Predicted glycosyl hydrolase; hypoxia induced; flow model biofilm induced	-1.56847	-1.54213	NA	NA	NA	NA	NA
C2_08200W_B	orf19.2165		Predicted hydrolase; induced by nitric oxide	NA	NA	NA	NA	NA	-2.27	NA
CR_01730W_B	IFU5	WWM1	Predicted membrane protein; estradiol-induced; upregulation associated with CDR1 and CDR2 overexpression or fluphenazine; putative drug-responsive regulatory site; similar to S. cerevisiae Wwm1p; Hap43-repressed; Spider biofilm repressed	NA	NA	NA	NA	NA	NA	-1.52
CR_06790C_B	orf19.1855		Predicted membrane transporter, member of the anion:cation symporter (ACS) family, major facilitator superfamily (MFS); Gcn4p-regulated; flucytosine induced; ketoconazole-repressed; oxidative stress-induced via Cap1p	-2.64995	-3.03863	NA	-2.00842	NA	NA	NA
CR_04620C_B	orf19.553	DTR1	Predicted membrane transporter, member of the drug:proton antiporter (12 spanner) (DHA1) family, major facilitator superfamily (MFS)	NA	NA	NA	-1.6906	NA	NA	NA
C4_04980W_B	orf19.3782	YBR220C	Predicted membrane transporter; member of the peptide-acetyl-coA transporter (PAT) family, major facilitator superfamily (MFS); induced by alpha pheromone in Spider medium	NA	1.90789	NA	NA	NA	NA	NA
C1_12930C_B	orf19.4923		Predicted membrane transporter; sugar porter (SP) family member, major facilitator superfamily; caspofungin induced; Spider biofilm induced	NA	NA	NA	NA	NA	1.72	NA
C1_01750W_B	orf19.4550	YCR023C	Predicted MFS membrane transporter, member of the drug:proton antiporter (12 spanner) (DHA1) family; flow model biofilm induced	-1.5493	-1.5284	-1.96797	NA	NA	NA	NA
CR_07010W_B	MIS11	MIS1	Predicted mitochondrial C1-tetrahydrofolate synthase precursor; putative protein of glycine catabolism; repressed by Efg1; fluconazole-induced; stationary phase enriched protein; rat catheter and Spider biofilm repressed	-1.6405	-1.72912	-1.60193	NA	NA	NA	NA
C7_04090C_B	orf19.7166		Predicted mitochondrial cardiolipin-specific phospholipase; upregulated in an azole-resistant strain that overexpresses MDR1; induced by Mnl1 under weak acid stress; rat catheter and Spider biofilm induced	-2.01899	-1.65828	NA	NA	NA	NA	NA
C1_00270W_B	orf19.6079		Predicted ORF in retrotransposon Tca8 with similarity to the Gag region encoding nucleocapsid-like protein; repressed by ciclopirox olamine; filament induced; regulated by Rfg1, Tup1; overlaps orf19.6078.1	NA	NA	-1.52448	-2.12091	NA	NA	NA
C1_00290W_B	POL93		Predicted ORF in retrotransposon Tca8 with similarity to the Pol region of retrotransposons encoding reverse transcriptase, protease and integrase; downregulated in response to ciclopirox olamine; F-12/CO2 early biofilm induced	NA	NA	NA	-2.14446	NA	NA	NA
C4_03990C_B	orf19.1208		Predicted ORF in the Major Repeat Sequence on chromosome 4; member of a family encoded by FGR6-related genes in the RB2 repeat sequence	NA	1.76331	NA	NA	NA	NA	NA
C6_03990C_B	orf19.5775		Predicted ORF overlapping the Major Repeat Sequence on chromosome 6; member of a family encoded by FGR6-related genes in the RB2 repeat sequence; rat catheter biofilm repressed	1.52766	1.77613	NA	NA	NA	NA	NA
C7_01100C_B	orf19.6896		Predicted ORF overlapping the Major Repeat Sequence on chromosome 7; member of a family encoded by FGR6-related genes in the RB2 repeat sequence	1.62722	1.93066	NA	NA	NA	NA	NA
CR_06380C_B	orf19.727		Predicted ORF overlapping the Major Repeat Sequence on chromosome R; member of a family encoded by FGR6-related genes in the RB2 repeat sequence	NA	1.77447	NA	NA	NA	NA	NA
C2_02330W_B	orf19.1551		Predicted protein of unknown function; overlaps CPR3/orf19.1552	NA	NA	NA	NA	NA	NA	-1.55
C5_04470C_B	orf19.3932		Predicted RNA binding protein; stationary phase enriched; induced in core caspofungin response; induced by nitric oxide independent of Yhb1; repressed in ssr1 null; ketoconazole, hypoxia induced; Spider biofilm induced	NA	2.13162	1.63713	1.81547	NA	NA	NA
C1_08310W_B	OPY2	OPY2	Predicted transmembrane protein; role in cell wall biogenesis; required for Cek1 phosphorylation; Spider biofilm induced	1.5664	NA	NA	NA	NA	NA	NA
C2_10690W_B	TPS3	TPS3	Predicted trehalose-phosphate synthase regulatory subunit; regulated by Efg1; regulated by Tsa1, Tsa1B under H2O2 stress conditions; flow model biofilm induced (reports differ)	-2.01478	-1.67741	NA	NA	NA	NA	NA
C2_00180C_B	orf19.2114		Predicted uricase; ortholog of S. pombe SPCC1223.09; Spider biofilm induced	-1.56358	NA	NA	NA	NA	NA	NA
CR_09220C_B	LIP7		Probable lipase, part of a gene family whose members are differentially expressed during infection; lacks a signal sequence for secretion, unlike other family members; may have a role in nutrition or in creating an acidic microenvironment	NA	NA	NA	NA	NA	NA	1.65
C1_07160C_B	orf19.4450.1		Protein conserved among the CTG-clade; 2 adjacent upstream SRE-1 elements; highly up-regulated in cecum-grown cells in a Cph2-dependent manner; Hap43-repressed; rat catheter, Spider and flow model biofilm induced	-1.61003	NA	-1.65593	NA	NA	NA	NA
C1_12730W_B	RVS162		Protein containing a BAR domain, which is found in proteins involved in membrane curvature; null mutant does not display the endocytic, hyphal growth, virulence, or cell wall defects exhibited by mutants in related genes RVS161 and RVS167	-1.66457	-1.57888	NA	NA	NA	NA	NA
C2_00250W_B	STF2	TMA10	Protein involved in ATP biosynthesis; repressed in hyphae; repressed by Efg1, Hap43; transcript upregulated in clinical isolates from HIV+ patients with oral candidiasis; rat catheter, flow model and Spider biofilm induced	-3.28787	-3.78762	-3.23921	-3.01885	NA	NA	NA
CR_07100W_B	FLC2	FLC2	Protein involved in heme uptake; putative FAD transporter, similar to S. cerevisiae Flc2p	1.57428	1.67815	NA	NA	NA	NA	NA
C7_00180W_B	FAR1	FAR1	Protein involved in regulation of pheromone-mediated mating; repressed by A1p and Alpha2p in white-phase cells; null mutant shows no pheromone response in opaque cells; overexpression causes enhanced pheromone response and cell cycle arrest	NA	NA	NA	NA	NA	2.21	1.93
C7_02750W_B	FGR6-1		Protein lacking an ortholog in S. cerevisiae; member of a family encoded by FGR6-related genes in the RB2 repeat sequence; transposon mutation affects filamentous growth	1.54219	1.83152	NA	NA	NA	NA	NA
C4_05530W_B	FGR6-10		Protein lacking an ortholog in S. cerevisiae; member of a family encoded by FGR6-related genes in the RB2 repeat sequence; transposon mutation affects filamentous growth	1.52256	1.86302	NA	NA	NA	NA	NA
C1_07770W_B	FGR6-3		Protein lacking an ortholog in S. cerevisiae; member of a family encoded by FGR6-related genes in the RB2 repeat sequence; transposon mutation affects filamentous growth	NA	1.80447	NA	NA	NA	NA	NA
C2_10420W_B	FGR6-4		Protein lacking an ortholog in S. cerevisiae; member of a family encoded by FGR6-related genes in the RB2 repeat sequence; transposon mutation affects filamentous growth	1.5157	1.82161	NA	NA	NA	NA	NA
C2_09080C_B	FGR18		Protein lacking an ortholog in S. cerevisiae; transposon mutation affects filamentous growth	NA	-1.54392	NA	NA	NA	NA	NA
C3_06890W_B	PMT2	PMT2	Protein mannosyltransferase (PMT) with roles in hyphal growth and drug sensitivity; member of the PMT family which includes Pmt1p, Pmt2p, Pmt4p, Pmt5p, and Pmt6p; induced during cell wall regeneration; essential	NA	2.00844	NA	NA	NA	NA	NA
C7_02890C_B	PMT1	PMT1	Protein mannosyltransferase; required for virulence in mice and for adhesion to epithelial cells; role in hyphal growth and drug sensitivity; Als1, Sec20, Kre9, Pir1 are substrates; 1 of 5 PMT family members	NA	1.81721	NA	NA	NA	NA	NA
C2_02910W_B	orf19.5814.1		Protein of unknown function	2.18584	3.28632	NA	NA	NA	NA	NA
C1_00190C_B	orf19.6084		Protein of unknown function; flow model biofilm induced; Spider biofilm induced	NA	NA	NA	-1.64099	NA	NA	NA
C2_09820W_B	orf19.1368		Protein of unknown function; flow model biofilm induced; Spider biofilm induced	NA	-1.62603	NA	-1.75618	NA	NA	NA
C3_03490W_B	RSN1		Protein of unknown function; flow model biofilm induced; Spider biofilm induced; induced during the mating process; Hap43-repressed	-1.6679	-2.16394	NA	-1.53881	NA	NA	NA
C3_03370C_B	orf19.334		Protein of unknown function; flow model biofilm induced; Spider biofilm induced; regulated by Sef1, Sfu1, and Hap43	-3.1488	-3.50337	-2.13561	-2.38712	NA	NA	NA
C3_02710W_B	orf19.263.1		Protein of unknown function; gene has intron; Spider biofilm induced	2.25267	3.26445	1.85503	1.93678	NA	NA	NA
C6_04420W_B	orf19.2125		Protein of unknown function; GlcNAc-induced protein; Spider biofilm induced; rat catheter biofilm repressed	NA	2.95746	NA	2.00537	NA	NA	NA
C1_11940C_B	orf19.5271		Protein of unknown function; Hap43-induced gene	1.76366	1.76178	NA	NA	NA	NA	NA
CR_00310C_B	orf19.7502		Protein of unknown function; Hap43-induced gene; upregulated in a cyr1 null mutant; Spider biofilm induced	NA	NA	NA	NA	NA	NA	-2
C1_10580C_B	orf19.1830		Protein of unknown function; Hap43-induced; rat catheter and Spider biofilm induced	1.85723	NA	NA	NA	NA	NA	NA
C7_03580C_B	orf19.6690		Protein of unknown function; Hap43-repressed gene	NA	NA	NA	NA	NA	NA	1.64
C1_08060W_B	OFR1		Protein of unknown function; Hap43-repressed gene; rat catheter biofilm repressed	-2.27087	-2.7283	NA	NA	NA	NA	NA
C3_05450C_B	orf19.6983		Protein of unknown function; Hap43-repressed gene; repressed by nitric oxide; Spider biofilm induced	NA	-1.70479	-1.72513	-1.71559	NA	NA	NA
C2_08390W_B	orf19.1433		Protein of unknown function; Hap43-repressed; colony morphology-related gene regulation by Ssn6; Spider biofilm induced	-2.75536	-2.66168	-1.53516	NA	NA	NA	NA
C3_00360W_B	orf19.5431		Protein of unknown function; Hap43-repressed; Spider biofilm induced	NA	NA	NA	NA	NA	-1.52	NA
CR_05210W_B	orf19.557		Protein of unknown function; Hap43-repressed; Spider biofilm repressed	NA	-2.27787	NA	NA	NA	NA	NA
C1_10800C_B	ALP1		Protein of unknown function; hypoxia, Hap43-repressed; ketoconazole induced; induced in oralpharyngeal candidasis; 16h flow model biofilm repressed, late-stage flow model biofilm induced; rat catheter and Spider biofilm induced	NA	-2.64401	NA	NA	NA	NA	NA
C1_11320C_B	orf19.670.2		Protein of unknown function; hypoxia, Hap43-repressed; ketoconazole induced; induced in oralpharyngeal candidasis; 16h flow model biofilm repressed, late-stage flow model biofilm induced; rat catheter and Spider biofilm induced	NA	NA	NA	1.76788	NA	NA	NA
CR_09930W_B	orf19.7567	YDR124W	Protein of unknown function; induced by alpha pheromone in SpiderM medium	-1.61024	NA	NA	NA	NA	NA	NA
C7_00770W_B	orf19.7042		Protein of unknown function; induced by benomyl or in an azole-resistant strain overexpressing MDR1; induced by nitric oxide; Spider biofilm induced	NA	-1.65395	NA	NA	NA	NA	NA
C7_03280C_B	orf19.5125	YLR149C	Protein of unknown function; induced by ketoconazole; Spider, F-12/CO2 and flow model biofilm induced	NA	-1.86233	NA	NA	NA	NA	NA
C1_12470W_B	orf19.69		Protein of unknown function; induced by Mnl1 under weak acid stress	NA	-1.76745	NA	NA	NA	NA	NA
C1_10050W_B	orf19.4872		Protein of unknown function; induced by Mnl1 under weak acid stress; Hap43-induced; mutant is viable	NA	NA	NA	NA	NA	-1.86	-1.62
C3_01270W_B	orf19.1724		Protein of unknown function; induced by nitric oxide independent of Yhb1p	-1.79506	-1.67531	NA	NA	NA	NA	NA
CR_06550C_B	orf19.711		Protein of unknown function; induced by nitric oxide; predicted ORF from Assembly 19; removed from Assembly 20; restored based on transcription data	2.49331	3.27863	2.83593	2.17939	NA	NA	-1.77
C1_09240C_B	orf19.4783		Protein of unknown function; induced during chlamydospore formation in both C. albicans and C. dubliniensis	-2.21424	-1.61148	NA	NA	NA	NA	NA
C7_01390W_B	orf19.6920		Protein of unknown function; induced during chlamydospore formation in both C. albicans and C. dubliniensis; Hap43-induced gene; Spider biofilm induced; F-12/CO2 early biofilm induced	NA	1.73514	NA	NA	NA	-2.06	-2.37
C1_00850W_B	IHD2		Protein of unknown function; induced during hyphae development; induced in low iron; Spider biofilm induced	NA	2.20231	-2.1261	NA	NA	NA	NA
C2_01450C_B	orf19.1449	DDI3	Protein of unknown function; induced in azole-resistant strain that overexpresses MDR1; protein present in exponential and stationary growth phase yeast cultures; Spider biofilm induced	1.85014	1.53297	NA	NA	NA	NA	NA
C5_04960W_B	orf19.3984	YGR237C	Protein of unknown function; induced in core caspofungin response; induced in ssr1 mutant; induced by nitric oxide independent of Yhb1; Spider biofilm induced	1.5012	NA	NA	NA	NA	-2.06	NA
C1_11670W_B	orf19.1152		Protein of unknown function; induced in core stress response; Gcn2 and Gcn4 regulated; flow model biofilm induced; Spider biofilm induced	NA	-1.73158	-1.61511	-1.88533	NA	NA	NA
C4_00860C_B	orf19.4706	PIN2	Protein of unknown function; induced in cyr1 or ras1 mutant; induced by fluconazole, by alpha pheromone in SpiderM medium and during oralpharyngeal candidasis; Spider biofilm induced	2.08565	2.28745	1.58479	NA	NA	NA	NA
C6_01360W_B	orf19.3448		Protein of unknown function; ketoconazole-repressed	NA	NA	NA	NA	NA	-2.64	-1.72
C5_03510C_B	orf19.6660	YHR131C	Protein of unknown function; mRNA binds to She3; Hap43-repressed; rat catheter and flow model biofilm induced	NA	NA	NA	NA	NA	NA	1.65
CR_02800C_B	orf19.2838		Protein of unknown function; mutation confers hypersensitivity to amphotericin B; flow model biofilm induced	NA	NA	NA	NA	NA	1.74	2.15
CR_02230W_B	orf19.3748		Protein of unknown function; orf19.3747 and orf19.3748 are short, overlapping ORFs in intergenic region between 2 oligopeptide transporter-encoding genes; flow model biofilm induced	-1.96121	-2.06803	-2.42516	-2.14504	NA	NA	NA
C6_02210W_B	orf19.3461		Protein of unknown function; oxidative stress-induced via Cap1; induced by alpha pheromone in SpiderM medium	NA	2.07816	NA	NA	NA	NA	NA
C5_03780C_B	orf19.1116		Protein of unknown function; planktonic growth-induced gene	-1.82427	-1.59842	NA	NA	NA	NA	NA
C4_03600C_B	orf19.1314		Protein of unknown function; planktonic growth-induced gene	-1.63105	-1.75447	NA	NA	NA	NA	NA
C1_03510C_B	orf19.3053		Protein of unknown function; present in exponential and stationary phase yeast; identified in extracts from biofilm and planktonic cells; flow model biofilm induced gene; GlcNAc-induced protein	-1.64973	-2.991	-1.70282	-2.39987	NA	-1.51	NA
C2_10650W_B	orf19.5342.2		Protein of unknown function; protein newly produced during adaptation to the serum	NA	NA	NA	NA	NA	NA	1.52
C4_06620C_A	orf19.2870		Protein of unknown function; rat catheter and Spider biofilm induced	NA	-1.6032	NA	NA	NA	NA	NA
CR_08880C_B	orf19.7283		Protein of unknown function; rat catheter and Spider biofilm induced	NA	-1.70312	NA	NA	NA	NA	NA
C4_04950W_B	orf19.3783		Protein of unknown function; rat catheter biofilm induced	-1.63452	-1.69956	NA	NA	NA	NA	NA
C1_11950W_B	orf19.5270		Protein of unknown function; rat catheter biofilm induced	NA	NA	NA	NA	NA	1.59	1.83
CR_08440W_B	orf19.6413		Protein of unknown function; rat catheter biofilm induced	NA	1.5447	NA	NA	NA	NA	NA
C1_10500W_B	orf19.993		Protein of unknown function; rat catheter biofilm repressed	NA	NA	NA	NA	NA	-1.67	NA
C1_01930W_B	orf19.4530.1	YIL024C	Protein of unknown function; regulated by Nrg1, Tup1; Spider and flow model biofilm induced	-2.69996	-4.01294	-1.65636	-2.14445	NA	NA	NA
C4_03500C_B	orf19.3378		Protein of unknown function; regulated by Tsa1, Tsa1B in minimal media at 37 degrees C	-1.84359	-3.2042	-1.88105	-2.65619	NA	NA	NA
CR_06140W_B	orf19.3869		Protein of unknown function; regulated by Tsa1, Tsa1B in minimal media at 37 degrees C; shows colony morphology-related gene regulation by Ssn6; Spider biofilm induced	NA	-2.45571	NA	-1.53169	NA	NA	NA
C6_00290W_B	CAWG_05329		Protein of unknown function; regulated by yeast-hypha switch; induced by Mnl1 in weak acid stress; 5' UTR intron; repressed by chlamydospore formation in C. albicans and C. dubliniensis; rat catheter, Spider and flow model biofilm induced	-1.55608	-1.53513	NA	-1.69902	NA	NA	NA
C2_08300C_B	orf19.1353		Protein of unknown function; repressed by yeast-hypha switch; Ras1-regulated; oral infection induced; mutants defective in damage to oral epithelium; flow model biofilm induced; Spider biofilm induced	-1.84322	-2.03389	NA	NA	NA	NA	1.56
C1_06370C_B	PBR1		Protein of unknown function; required for cohesion, adhesion, and RPMI biofilm formation; induced by alpha pheromone in white cells; fluconazole-induced; Spider biofilm induced	3.94878	3.41146	NA	NA	NA	-2.34	-2.15
C1_09340C_B	orf19.4795		Protein of unknown function; Sef1-, Sfu1-, and Hap43 regulated; Spider biofilm induced	NA	NA	NA	NA	NA	1.64	1.72
C2_10300C_B	orf19.1748		Protein of unknown function; shows colony morphology-related gene regulation by Ssn6	NA	-1.8904	NA	NA	NA	NA	NA
C5_04250W_B	MRV8		Protein of unknown function; Spider biofilm induced	2.3294	3.29155	NA	NA	NA	-1.59	NA
C4_04380C_B	orf19.1409.2		Protein of unknown function; Spider biofilm induced	2.10729	3.46536	NA	NA	NA	NA	-2.42
C4_05440C_B	orf19.1800	TDA6	Protein of unknown function; Spider biofilm induced	NA	-1.53758	NA	NA	NA	NA	NA
C1_02800W_B	orf19.2968		Protein of unknown function; Spider biofilm induced	NA	-2.06141	-1.54164	NA	NA	NA	1.71
C1_09130W_B	orf19.4771		Protein of unknown function; Spider biofilm induced	NA	1.94554	NA	NA	NA	NA	NA
CR_04220C_B	orf19.510		Protein of unknown function; Spider biofilm induced	-1.6428	-2.53734	NA	-1.6091	NA	NA	1.82
C3_06950W_B	orf19.6805	YDR089W	Protein of unknown function; Spider biofilm induced	NA	NA	NA	NA	NA	1.59	NA
C1_04590W_B	orf19.6852.1		Protein of unknown function; Spider biofilm induced	-1.61683	-1.76141	NA	NA	NA	NA	NA
CR_08830W_B	orf19.7279.1		Protein of unknown function; Spider biofilm induced	NA	-2.76254	NA	NA	NA	NA	1.97
CR_06570C_B	orf19.915		Protein of unknown function; Spider biofilm induced	-1.68769	NA	-1.88213	NA	NA	NA	NA
C3_06140W_B	orf19.7396		Protein of unknown function; Spider biofilm induced; Hap43-repressed	-1.58245	NA	NA	NA	NA	NA	NA
C6_02940C_B	orf19.5572		Protein of unknown function; Spider biofilm repressed	NA	NA	NA	1.58294	NA	NA	NA
C1_04470C_B	orf19.6840		Protein of unknown function; transcript detected in high-resolution tiling arrays; transcription induced by alpha pheromone in SpiderM medium; Spider and early-stage flow model biofilm induced	NA	NA	NA	NA	NA	NA	-1.53
C2_01960C_B	orf19.1508		Protein of unknown function; transcript detected on high-resolution tiling arrays	NA	NA	NA	NA	NA	-1.94	NA
CR_07140C_B	orf19.11		Protein of unknown function; transcript regulated by Mig1 and Tup1; rat catheter biofilm induced	-2.00625	-2.26435	NA	NA	NA	NA	1.91
C2_07280W_A	orf19.2285		Protein of unknown function; transcription induced by benomyl treatment	NA	NA	NA	NA	NA	NA	1.85
C3_03460C_B	orf19.344		Protein of unknown function; upregulated by fluphenazine treatment or in an azole-resistant strain that overexpresses CDR1 and CDR2; transcript possibly regulated by Tac1	NA	-1.85063	NA	NA	NA	NA	NA
C1_14190C_B	orf19.7227	YPI1	Protein phosphatase inhibitor; Hap43-repressed; homozygous Tn insertion decreases colony wrinkling but does not block hyphal growth in liquid media; mutation confers hypersensitivity to toxic ergosterol analog; Spider biofilm induced	-1.90397	-2.11503	NA	NA	NA	NA	NA
C1_08170C_B	BUL1		Protein similar but not orthologous to S. cerevisiae Bul1; a protein involved in selection of substrates for ubiquitination; mutants are viable; macrophage/pseudohyphal-induced; rat catheter biofilm induced	-1.85915	-1.56269	NA	-1.7286	NA	NA	NA
C1_11610C_B	orf19.1159		Protein similar to A. nidulans CysA serine O-trans-acetylase; suggests that C. albicans uses an O-acetyl-serine (OAS) pathway of sulfur assimilation; F-12/CO2 early biofilm induced; Spider biofilm induced	-1.97567	-2.73219	NA	NA	NA	NA	NA
C5_03770C_B	orf19.1117		Protein similar to Candida boidinii formate dehydrogenase; virulence-group-correlated expression; Hap43-repressed; Spider biofilm repressed	-1.57896	-1.64819	NA	NA	NA	NA	NA
CR_07300W_B	orf19.6138		Protein similar to ferric reductase Fre10p; possibly an essential gene, disruptants not obtained by UAU1 method	NA	NA	NA	NA	NA	1.64	NA
C1_05540C_B	orf19.411		Protein similar to GTPase regulators; induced in low iron; transcript activated by Mnl1 under weak acid stress; Hap43-, Sfu1- and Sef1-regulated; flow model biofilm induced, Spider biofilm induced	-2.0865	-2.60742	NA	NA	NA	NA	NA
C5_03240W_B	BUB3	BUB3	Protein similar to S. cerevisiae Bub3; a kinetochore checkpoint component; induced by hydroxyurea treatment; flow model biofilm induced; Spider biofilm induced	-1.7108	-1.79991	NA	NA	NA	NA	NA
C1_09400C_B	FTH1	FTH1	Protein similar to S. cerevisiae Fth1p, a high affinity iron transporter for intravacuolar stores of iron; repressed by Sfu1p, amphotericin B, caspofungin; induced by alkaline pH, ciclopirox olamine; regulated by Sef1p, Sfu1p, and Hap43p	NA	NA	NA	NA	NA	1.69	1.89
C1_13170C_B	MSH6	MSH6	Protein similar to S. cerevisiae Msh6p, which is involved in mismatch repair; repressed under Cdc5p depletion; Hap43p-induced gene	1.77253	NA	NA	NA	NA	NA	NA
CR_01640C_B	orf19.2553		Protein similar to S. cerevisiae Pmr1p; amphotericin B induced; previously merged with orf19.2552 in Assembly 20; unmerged from orf19.2552 in a revision of Assembly 21	-2.82405	-3.40294	NA	-2.13713	NA	NA	NA
CR_01630C_B	orf19.2552		Protein similar to S. cerevisiae Pmr1p; amphotericin B induced; previously merged with orf19.2553; unmerged from orf19.2553 in a revision of Assembly 21	-2.22156	-2.86101	NA	-2.10985	NA	NA	NA
C3_04480C_B	RAS2		Protein similar to S. cerevisiae Ras2; has opposite effects to Ras1; Tn mutation affects filamentous growth; rat catheter and Spider biofilm induced	-2.74685	-3.32542	NA	-1.89307	NA	NA	NA
CR_09680C_B	RTA4		Protein similar to S. cerevisiae Rsb1p, involved in fatty acid transport; transposon mutation affects filamentous growth; alkaline downregulated; caspofungin induced; possibly an essential gene; Hap43p-repressed	NA	3.04388	NA	NA	NA	NA	-2
C4_01800W_B	orf19.4612		Protein with a dienelactone hydrolase domain; Hap43-repressed gene	-1.51407	-3.60025	-1.52713	-3.72975	NA	NA	NA
CR_04250W_B	orf19.513		Protein with a DNA-binding domain, similar to S. cerevisiae meiosis-specific transcription factor Ndt80p	NA	NA	NA	NA	NA	1.62	NA
C1_04010C_B	orf19.4476		Protein with a NADP-dependent oxidoreductase domain; transcript induced by ketoconazole; rat catheter and Spider biofilm induced	NA	2.74958	NA	NA	NA	NA	NA
CR_10200W_B	orf19.7596		Protein with a phosphoglycerate mutase family domain; Hap43-repressed gene	-3.5635	-3.25096	-1.5557	-1.84462	NA	NA	NA
C1_03750W_B	orf19.1034		Protein with a predicted cytochrome b5-like Heme/Steroid binding domain; Hap43, caspofungin repressed; flow model biofilm induced	-2.31823	-2.04884	NA	NA	NA	NA	NA
CR_09350C_B	orf19.7330	PET18	Protein with a predicted heme oxygenase domain; Spider biofilm induced	NA	-1.69549	-1.5494	NA	NA	NA	NA
C1_08240C_B	orf19.5103		Protein with a predicted phosphoglycerate mutase family domain; Hap43-repressed; clade-associated gene expression; induced by hypoxia	-1.87712	-2.21563	NA	NA	NA	NA	NA
C1_02600W_B	SNO1	SNO1	Protein with a predicted role in pyridoxine metabolism; stationary phase protein; regulated by Tup1, Efg1; Spider biofilm induced	-2.15811	NA	-1.64921	NA	NA	NA	NA
C1_04130W_B	ERB1	ERB1	Protein with a predicted role in ribosomal large subunit biogenesis; mutation confers hypersensitivity to 5-fluorocytosine (5-FC), 5-fluorouracil (5-FU), and tubercidin (7-deazaadenosine); hyphal, macrophage repressed	NA	NA	NA	NA	NA	NA	-1.6
C3_05810C_B	SKN1		Protein with a role in beta-1,6-glucan synthesis; probable N-glycosylated type II membrane protein; transcript and mRNA length change induced by yeast-hypha transition; induced by Rim101, caspofungin; rat catheter and Spider biofilm induced	3.1818	2.71549	1.60706	NA	NA	-1.68	-2.28
CR_08670C_B	orf19.6443		Protein with an enoyl-CoA hydratase related domain; Spider biofilm induced	NA	NA	NA	NA	NA	1.76	1.95
C2_07270W_B	orf19.2284		Protein with an FMN-binding domain; Hap43-repressed; flow model biofilm induced	NA	NA	NA	NA	NA	1.94	1.62
C2_00690W_B	orf19.2059		Protein with homology to magnesium-dependent endonucleases and phosphatases; regulated by Sef1, Sfu1, and Hap43; Spider biofilm induced	NA	NA	NA	NA	NA	NA	-1.68
C4_03340C_A	orf19.1438		Protein with homology to NADH dehydrogenase; regulated by Sef1p-, Sfu1p-, and Hap43p	1.5197	NA	NA	NA	NA	NA	NA
C7_03030W_B	orf19.5158		Protein with similarity to a human gene associated with colon cancer and to orf19.5158; regulated by Gcn4, Cyr1; induced by amino acid starvation; macrophage-induced protein, macrophage-repressed; Spider biofilm induced	NA	-1.82708	NA	NA	NA	NA	NA
CR_07280W_B	FRE30		Protein with similarity to ferric reductases; downregulated in response to amphotericin B, estradiol, or ciclopirox olamine, and upregulated by interaction with macrophage; un-merged from orf19.6139 in a revision of Assembly 21	4.76457	4.94634	NA	NA	NA	-5.14	-5.61
CR_06660W_B	SEO1	SEO1	Protein with similarity to permeases; Sfu1-repressed; flucytosine induced; induced by Mnl1 under weak acid stress; flow model biofilm repressed	-3.22154	-3.69168	-1.88821	-2.77794	NA	NA	NA
C4_03100W_B	RBT7		Protein with similarity to RNase T2 enzymes; has putative secretion signal; expression is Tup1-repressed	-1.76829	-2.07614	NA	NA	NA	NA	NA
C2_00760C_B	orf19.2048		Proten of unknown function; transcript positively regulated by Sfu1; Hap43 repressed; Spider biofilm induced	-2.57575	-2.72688	NA	NA	NA	NA	NA
C1_14120C_B	RBE1	PRY2	Pry family cell wall protein; Rim101, Efg1, Ssn6, alkaline repressed; O-glycosylation; no GPI anchor predicted; ketoconazol induced; regulated by Sef1, Sfu1, Hap4; flow model biofilm induced; rat catheter and Spider biofilm repressed	NA	-2.75933	NA	-1.89227	NA	NA	NA
C1_07040C_B	orf19.6200		Pry family pathogenesis-related protein; oral infection upregulated gene; mutant has reduced capacity to damage oral epithelial cells	NA	-2.29086	NA	NA	NA	2.27	2.98
CR_02900W_B	orf19.2847.1		Pseudogene; formerly an ORF Predicted by Annotation Working Group that was subsequently removed from Assembly 20	NA	NA	NA	NA	NA	NA	1.52
C6_03340C_B	GLC3	GLC3	Putative 1,4-glucan branching enzyme; fluconazole-induced; colony morphology-related gene regulation by Ssn6; stationary phase enriched protein	NA	-1.73748	NA	NA	NA	NA	NA
CR_05440W_B	orf19.3515	BNA1	Putative 3-hydroxyanthranilic acid dioxygenase, involved in NAD biosynthesis; Hap43p-repressed gene	-1.50865	-1.5288	NA	NA	NA	NA	NA
C4_07030W_B	MET16	MET16	Putative 3'-phosphoadenylsulfate reductase; sulfur amino acid metabolism; reports differ on regulation during biofilm formation; fungal-specific; possibly an essential gene, disruptants not obtained by UAU1 method; Hap43p-repressed gene	-1.7288	-2.52351	NA	NA	NA	NA	NA
C1_08070W_B	CDR4		Putative ABC transporter superfamily; fluconazole, Sfu1, Hog1, core stress response induced; caspofungin repressed; fluconazole resistance not affected by mutation or correlated with expression; rat catheter and flow model biofilm induced	-3.44898	-4.0569	-1.63859	NA	NA	NA	1.72
CR_00640W_B	ACC1	ACC1	Putative acetyl-coenzyme-A carboxylases; regulated by Efg1; amphotericin B repressed; caspofungin repressed; 5'-UTR intron; gene used for strain identification by multilocus sequence typing; Hap43-induced; flow model biofilm repressed	NA	-1.53689	NA	NA	NA	NA	NA
C3_01930W_B	PXP2		Putative acyl-CoA oxidase; enzyme of fatty acid beta-oxidation; induced during macrophage infection; opaque specific transcript; putative peroxisome targeting signal; Spider biofilm induced	NA	-1.82461	NA	NA	NA	NA	NA
C2_05950C_B	TES15		Putative acyl-CoA thioesterase; Hap43-repressed; Spider biofilm induced	NA	NA	NA	NA	NA	1.69	1.57
C1_03390W_B	EHT1	EHT1	Putative acyl-coenzymeA:ethanol O-acyltransferase; regulated by Sef1, Sfu1, and Hap43; induced by alpha pheromone in SpiderM medium; Spider biofilm induced; promoter bound by Ndt80	NA	-2.33092	1.65042	NA	NA	NA	NA
C4_02440C_B	PGA38		Putative adhesin-like GPI-anchored protein; repressed during cell wall regeneration; possibly an essential gene, disruptants not obtained by UAU1 method; rat catheter and Spider biofilm repressed	NA	-1.69096	NA	NA	NA	NA	NA
C1_11260C_B	orf19.675.1		Putative adhesin-like protein	NA	2.03956	NA	NA	NA	NA	NA
C1_10170W_B	orf19.4886		Putative adhesin-like protein; Hap43-repressed; rat catheter and Spider biofilm induced	NA	NA	-2.1261	NA	NA	NA	NA
C1_13100W_B	orf19.4936.1		Putative adhesin-like protein; Spider biofilm induced	1.70152	3.02305	NA	NA	NA	NA	-2.07
CR_02070C_B	ADH5		Putative alcohol dehydrogenase; regulated by white-opaque switch; fluconazole-induced; antigenic in murine infection; regulated by Nrg1, Tup1; Hap43, macrophage repressed, flow model biofilm induced; Spider biofilm induced	-2.9329	-3.25735	-2.92451	-2.46125	NA	NA	NA
CR_05340C_B	IFE2		Putative alcohol dehydrogenase; yeast-enriched transcript; Efg1-regulated; induced by prostaglandins, Hog1, fluconazole; rat catheter biofilm induced	-5.03282	-5.62501	-4.95503	-3.93105	NA	NA	NA
C3_04160W_A	DAL8		Putative allantoate permease; fungal-specific (no human or murine homolog)	NA	NA	NA	NA	NA	1.51	NA
C2_09750W_B	LEU42		Putative alpha-isopropylmalate synthase; fungal-specific; induced by human blood or polymorphonuclear cells; regulated by Gcn2 and Gcn4; stationary phase enriched protein; Spider biofilm induced	-1.64642	-1.68502	NA	NA	NA	NA	NA
CR_04480C_B	LAP3	LAP3	Putative aminopeptidase; positively regulated by Sfu1; clade-associated gene expression; virulence-group-correlated expression; induced by alpha pheromone in SpiderM medium; Hap43-induced; Spider and flow model biofilm induced	-2.69109	-2.9053	NA	NA	NA	NA	NA
CR_04210C_B	QDR1	QDR1	Putative antibiotic resistance transporter; regulated by white-opaque switch, Nrg1, Tup1; Hap43, caspofungin repressed; repressed during chlamydospore formation; flow model biofilm induced; Spider biofilm repressed	-1.51554	NA	NA	NA	NA	NA	NA
C2_02950W_B	orf19.5809	BNA3	Putative arylformamidase, enzyme of the NAD biosynthesis pathway; Gcn4p-regulated	NA	-2.40163	NA	NA	NA	NA	NA
CR_01930C_B	BIO2	BIO2	Putative biotin synthase; induced by high iron; repressed by ciclopirox olamine; upregulated in clinical isolates from HIV+ patients with oral candidiasis; Hap43-repressed; Spider biofilm induced	-1.55537	-3.49521	NA	NA	NA	NA	2.27
C7_02840C_B	ERG5	ERG5	Putative C-22 sterol desaturase; fungal C-22 sterol desaturases are cytochrome P450 enzymes of ergosterol biosynthesis, catalyze formation of the C-22(23) double bond in the sterol side chain; transposon mutation affects filamentous growth	NA	-1.81051	NA	NA	NA	NA	NA
CR_08990C_B	orf19.7296		Putative cation conductance protein; similar to stomatin mechanoreception protein; plasma-membrane localized; induced by Rgt1; rat catheter and Spider biofilm induced	2.37098	2.62129	1.93351	2.1444	NA	NA	NA
C1_11990W_B	orf19.5267		Putative cell wall adhesin-like protein; repressed in core caspofungin response and by alpha pheromone in SpiderM medium; transcript reduced in ace2 mutant; flow model, rat catheter and Spider biofilm repressed	NA	-2.18453	NA	-1.86819	NA	NA	NA
C4_04590W_B	SCS7	SCS7	Putative ceramide hydroxylase; regulated by Nrg1; induced in high iron; fluconazole-induced; Hap43-repressed; Spider biofilm induced	-1.61298	-1.59369	NA	NA	NA	NA	NA
C1_02580W_B	HNM4		Putative choline permease; fungal-specific (no human or murine homolog)	NA	-1.80774	-1.58788	NA	NA	NA	NA
C2_00260C_B	MUQ1	ECT1	Putative choline phosphate cytidylyltransferase/phosphoethanolamine cytidylyltransferase; repressed in hyphae compared vs yeast; Hap43-repressed; flow model biofilm induced; Spider biofilm repressed	-1.97363	-1.84832	NA	NA	NA	NA	NA
C3_04270C_B	CTP1	CTP1	Putative citrate transport protein; flucytosine induced; amphotericin B repressed, caspofungin repressed; Hap43p-induced gene	NA	-1.62796	NA	NA	NA	NA	NA
CR_02400W_B	PHO112		Putative constitutive acid phosphatase; Rim101-repressed; DTT-extractable; N-glycosylated; Hap43-induced; possibly an essential gene, disruptants not obtained by UAU1 method	-2.54366	-3.15324	-1.99882	-2.19424	NA	NA	NA
CR_02180W_B	PHO113	PHO11	Putative constitutive acid phosphatase; Rim101-repressed; DTT-extractable; N-glycosylated; possibly an essential gene, disruptants not obtained by UAU1 method	-2.89479	-3.33046	-2.26421	-2.33502	NA	NA	NA
C5_05190W_B	PCL5	PCL5	Putative cyclin for Pho85 kinase; Gcn4-induced; suppresses toxicity of C. albicans Gcn4 overproduction in S. cerevisiae via increased Pho85-dependent phosphorylation and degradation of Gcn4; rat catheter and Spider biofilm induced	-1.80155	-1.864	NA	NA	NA	NA	NA
CR_09180W_B	CDG1		Putative cysteine dioxygenases; role in conversion of cysteine to sulfite; transcript regulated upon white-opaque switch; rat catheter, Spider and flow model biofilm induced	NA	2.83664	NA	NA	NA	NA	-2.14
C1_13630W_B	CYB2	CYB2	Putative cytochrome b2 precursor; induced in high iron; alkaline repressed; colony morphology-related gene regulation by Ssn6; Hap43-repressed; pider biofilm induced	-2.11924	-1.6493	NA	NA	NA	1.63	NA
C4_07040W_B	orf19.3105		Putative cytochrome P450 protein; possibly an essential gene, disruptants not obtained by UAU1 method	-1.81085	-2.42594	NA	-1.50317	NA	NA	NA
C5_02930C_B	GRE3	GRE3	Putative D-xylose reductase; antigenic in murine systemic infection; soluble protein in hyphae; induced by farnesol, macrophage interaction and by Mnl1 under weak acid stress; stationary-phase enriched protein; Spider biofilm induced	-2.10559	-2.15559	-1.86536	-1.57359	NA	NA	NA
C5_04880C_B	PUT2	PUT2	Putative delta-1-pyrroline-5-carboxylate dehydrogenase; alkaline upregulated; protein present in exponential and stationary growth phase yeast cultures; flow model biofilm induced; Spider biofilm induced	NA	2.02066	NA	NA	NA	NA	-1.6
CR_01910C_B	orf19.2590	BIO4	Putative dethiobiotin synthetase; transcript upregulated in clinical isolates from HIV+ patients with oral candidiasis; Hap43-repressed; GlcNAc-induced protein; Spider biofilm induced	NA	NA	NA	NA	NA	1.79	NA
C1_09190C_B	DAK2	DAK2	Putative dihydroxyacetone kinase; repressed by yeast-hypha switch; fluconazole-induced; caspofungin repressed; protein enriched in stationary phase yeast cultures; flow model biofilm induced; rat catheter and Spider biofilm repressed	-3.31577	-3.33276	-2.88037	-2.25733	NA	NA	NA
C4_06490C_B	PRI2	PRI2	Putative DNA primase; gene adjacent to and divergently transcribed with CDC68; Hap43-induced; Spider biofilm repressed	1.64319	NA	NA	NA	NA	NA	NA
C2_07820C_A	PHO86	PHO86	Putative endoplasmic reticulum protein; possibly adherence-induced	-1.50767	NA	NA	NA	NA	NA	NA
C7_00430W_B	orf19.7077	FRE7	Putative ferric reductase; induced by Mac1 under copper starvation; Plc1-regulated; Rim101-repressed	NA	2.38154	NA	NA	NA	-1.97	-3
C7_03090C_B	SSP96		Putative flavin-containing monooxygenase; F-12/CO2 early biofilm induced	NA	NA	NA	NA	NA	1.53	NA
C2_05700W_B	OSM1		Putative flavoprotein subunit of fumarate reductase; soluble protein in hyphae; caspofungin repressed; stationary phase enriched protein; flow model biofilm induced; Spider biofilm repressed	-3.13346	-3.15688	-3.38404	-3.22169	NA	NA	NA
C3_07640C_B	FUM12		Putative fumarate hydratase; enzyme of citric acid cycle; fluconazole, Efg1 repressed; induced in high iron; protein present in exponential and stationary growth phase	NA	1.79067	NA	1.55131	NA	NA	NA
C3_00930W_B	ATO2		Putative fungal-specific transmembrane protein; fluconazole repressed, Hap43-repressed; flow model biofilm induced; Spider biofilm induced	NA	-1.50119	NA	NA	NA	NA	NA
C3_00920W_B	ATO1		Putative fungal-specific transmembrane protein; induced by Rgt1; Spider biofilm induced	NA	NA	NA	NA	NA	-1.75	-1.55
C2_04190C_B	UGA1	UGA1	Putative GABA transaminase; transcription regulated by Mig1 and Tup1; stationary phase enriched protein; rat catheter and Spider biofilm induced	NA	NA	NA	NA	NA	1.59	1.52
C2_02850W_B	UGA6		Putative GABA-specific permease; decreased transcription is observed upon benomyl treatment or in an azole-resistant strain that overexpresses MDR1	-2.71899	-2.79518	-1.66162	NA	NA	NA	NA
C4_03540C_B	ECM38		Putative gamma-glutamyltransferase; alkaline upregulated; Spider biofilm induced; possibly an essential gene, disruptants not obtained by UAU1 method	NA	NA	NA	NA	NA	1.54	1.86
CR_07490C_B	GLK4		Putative glucokinase; decreased expression in hyphae compared to yeast-form cells	-2.98222	-3.35387	-2.70164	-2.08893	NA	NA	NA
CR_07150W_B	GLK1	GLK1	Putative glucokinase; transcript regulated upon yeast-hyphal switch; Efg1 regulated; fluconazole-induced; induced in core stress response; colony morphology-related gene regulation by Ssn6; GlcNAc-induced protein	-3.00981	-3.44753	-2.80772	-2.24611	NA	NA	NA
C2_09070C_B	orf19.4066		Putative glycerol-3-phosphate acyltransferase; Hog1-repressed	NA	-1.80945	NA	NA	NA	NA	NA
C5_00890C_B	GIT2		Putative glycerophosphoinositol permease; fungal-specific; repressed by alpha pheromone in SpiderM medium; Hap43-repressed; Spider biofilm induced	NA	NA	NA	NA	NA	-2.72	-2.01
C4_05140C_B	GDB1	GDB1	Putative glycogen debranching enzyme; expression is regulated upon white-opaque switch; regulated by Nrg1, Tup1; rat catheter biofilm repressed	NA	-1.64706	NA	NA	NA	NA	NA
C7_00930W_B	GPH1	GPH1	Putative glycogen phosphorylase; role in glycogen metabolism; regulated by Ssk1, Mig1, Tup1, Hap43; fluconazole-induced; localizes to cell surface of hyphae, not yeast; stationary phase enriched protein; Spider biofilm induced	NA	-1.97584	-2.37738	-2.27074	NA	NA	NA
C1_01360C_B	CaO19.3325	GLG2	Putative glycogen synthesis initiator; regulated by Efg1 and Efh1; Hog1-repressed; colony morphology-related gene regulation by Ssn6; induced by prostaglandins; flow model biofilm induced	-1.64975	-2.58162	1.50832	NA	NA	NA	NA
C3_01730C_B	UTR2	UTR2	Putative GPI anchored cell wall glycosidase; role in adhesion, hyphal growth on Spider (not serum) medium; chitin-binding, glycosyl hydrolase domains; induced during cell wall regeneration; mRNA in yeast-form cells; Spider biofilm induced	NA	1.54593	NA	NA	NA	NA	-1.74
C6_00160W_A	PGA48		Putative GPI-anchored adhesin-like protein; similar to S. cerevisiae Spi1p, which is induced at stationary phase; transcript induced in high iron; flow model biofilm induced; Spider biofilm repressed	NA	-1.52519	NA	NA	NA	NA	NA
C7_04240C_B	orf19.7149	ROY1	Putative GTPase inhibitor; predicted role in endocytosis, protein targeting to vacuole; rat catheter biofilm repressed	-1.64585	-1.88364	NA	NA	NA	NA	NA
C5_02110W_B	orf19.4216	HSP12	Putative heat shock protein; decreased expression in hyphae; transcription is increased in populations of cells exposed to fluconazole over multiple generations; overexpression increases resistance to farnesol and azoles	NA	NA	NA	-1.49755	NA	NA	NA
C1_11870W_B	MUP1	MUP1	Putative high affinity methionine permease; alkaline upregulated by Rim101; Spider biofilm induced	NA	-1.79676	NA	NA	NA	NA	NA
C2_01020W_B	HGT6	HXT6	Putative high-affinity MFS glucose transporter; 20 family members; induced in core stress response; fluconazole, oralpharyngeal candidasis induced; flow model biofilm induced; Spider biofilm induced	NA	-1.75491	-1.75904	NA	NA	NA	NA
C1_07430W_B	PHO100		Putative inducible acid phosphatase; DTT-extractable and observed in culture supernatant in low-phosphate conditions; slight effect on murine virulence; virulence-group-correlated expression; N-glycosylated; F-12/CO2 early biofilm induced	-3.05844	-3.72967	NA	NA	NA	NA	NA
C4_05540W_B	HOM3	HOM3	Putative L-aspartate 4-P-transferase; fungal-specific (no human or murine homolog); regulated by Gcn2 and Gcn4; early-stage flow model biofilm induced	-2.22598	-1.84724	NA	NA	NA	NA	NA
C7_02270W_B	LDG3		Putative LDG family protein; F-12/CO2 early biofilm induced	2.77153	3.65484	2.37328	4.01293	NA	NA	1.7
CR_09780C_B	IFA14		Putative LPF family protein; Plc1-regulated; induced by alpha pheromone in SpiderM medium	NA	-2.64947	NA	NA	NA	NA	NA
C1_04750W_B	IFE1	BDH2	Putative medium-chain alcohol dehydrogenase; rat catheter and Spider biofilm repressed	NA	NA	NA	NA	NA	1.66	NA
C3_02950C_B	MET13	MET13	Putative methionine biosynthesis protein; ketoconazole-induced; amphotericin B repressed; Spider biofilm repressed	-1.83539	-2.48777	NA	NA	NA	NA	NA
C2_00960C_B	MXR1	MXR1	Putative methionine sulfoxide reductase; Plc1-regulated; induced by human neutrophils, flucytosine; macrophage regulated (gene induced, protein decreased); possibly adherence-induced; Spider biofilm induced	NA	-1.77975	NA	NA	NA	NA	NA
C1_02110C_B	HGT2		Putative MFS glucose transporter; 20 member C. albicans glucose transporter family; 12 probable membrane-spanning segments; expressed in rich medium with 2% glucose; rat catheter and Spider biofilm induced	NA	-2.04037	1.71054	NA	NA	NA	NA
C6_04610C_B	NAG3		Putative MFS transporter; similar to Nag4; required for wild-type mouse virulence and cycloheximide resistance; in gene cluster that includes genes encoding enzymes of GlcNAc catabolism; Spider biofilm repressed	NA	1.73873	NA	NA	NA	NA	NA
C1_08750W_B	YMC2		Putative mitochondrial carrier protein; Gcn4-regulated; F-12/ CO2 early biofilm induced; Spider biofilm induced	-1.82641	-1.90542	NA	NA	NA	1.53	NA
C6_00920W_B	orf19.93	MIX17	Putative mitochondrial intermembrane space protein; colony morphology-related gene regulation by Ssn6; regulated by Sef1, Sfu1, and Hap43; Spider biofilm repressed; rat catheter biofilm induced	NA	NA	NA	1.63195	NA	NA	NA
C3_06700C_B	orf19.7459	YBR238C	Putative mitochondrial protein with a predicted role in respiratory growth; fluconazole-induced; ketoconazole-repressed; mutants display a strong defect in flow model biofilm formation; Spider biofilm induced	-1.89194	NA	NA	NA	NA	NA	NA
C2_09860C_B	orf19.1365		Putative monooxygenase; mutation confers hypersensitivity to toxic ergosterol analog; constitutive expression independent of MTL or white-opaque status	NA	-1.60052	NA	NA	NA	1.51	1.65
C2_00160C_B	NAT2	NAT2	Putative N-terminal acetyltransferase; Hap43p-repressed gene; mutation confers hypersensitivity to toxic ergosterol analog	NA	NA	NA	NA	NA	-1.63	-1.76
C2_08640C_B	PST2		Putative NADH:quinone oxidoreductase; similar to 1,4-benzoquinone reductase; immunogenic in mice; induced by benomyl, oxidative stress via Cap1; fungal-specific; farnesol-repressed; Spider biofilm induced	NA	-1.70958	NA	NA	NA	NA	NA
CR_01200W_B	OYE22		Putative NADPH dehydrogenase; rat catheter biofilm induced	NA	NA	NA	NA	NA	1.56	NA
C5_03060C_B	TNA1	TNA1	Putative nicotinic acid transporter; detected at germ tube plasma membrane by mass spectrometry; transcript induced upon phagocytosis by macrophage; rat catheter biofilm induced	-2.25528	-3.97727	NA	-2.89342	NA	NA	NA
C3_00480C_B	DOT5	DOT5	Putative nuclear thiol peroxidase; alkaline downregulated; sumoylation target; Spider and flow model biofilm induced	-1.63923	-1.79985	NA	NA	NA	NA	NA
C4_01320C_B	OPT6		Putative oligopeptide transporter; fungal-specific (no human or murine homolog); expression of OPT6, OPT7, or OPT8 does not suppress defect of mutant lacking Opt1p, Opt2p, and Opt3p; alleles are nonidentical	NA	1.97216	NA	NA	NA	NA	NA
C4_00440C_B	OPT7		Putative oligopeptide transporter; possibly transports GSH or related compounds; Hog1-induced; expression of OPT6, -7, or -8 does not suppress defect of mutant lacking OPT1-3; Hap43-repressed; F-12/CO2 early biofilm induced	-4.2774	-5.26153	NA	-2.85796	NA	2.53	1.71
C6_01420C_B	orf19.3442		Putative oxidoreductase; Hap43-repressed gene	NA	-1.88931	-1.59853	-2.14004	NA	-1.87	-1.65
C5_02690W_B	orf19.4287		Putative oxidoreductase; Hap43-repressed gene; clade-associated gene expression	-1.85229	-2.0728	NA	NA	NA	NA	NA
C7_01170C_B	orf19.6899		Putative oxidoreductase; mutation confers hypersensitivity to toxic ergosterol analog; rat catheter and Spider biofilm induced	-1.53209	-2.10123	NA	NA	NA	NA	NA
C6_02980C_B	orf19.5576	CAB1	Putative pantothenate kinase; ortholog of S. cerevisiae Cab1; transposon mutation affects filamentous growth; repressed in core stress response	NA	-1.87104	NA	NA	NA	NA	NA
C2_05660W_B	PNG2		Putative peptide:N-glycanase; gene has variable numbers of 12-bp repeats; induced by caspofungin, ciclopirox olamine, ketoconazole or hypoxia; gene of core caspofungin response; Hap43-induced; Spider biofilm induced	NA	NA	NA	NA	NA	NA	-1.53
C2_03120W_B	AMO1		Putative peroxisomal copper amine oxidase	-3.11301	-3.08452	NA	NA	NA	NA	NA
C2_00390C_B	orf19.2092	STR3	Putative peroxisomal cystathionine beta-lyase; Gcn4p-regulated	-1.76777	-1.91482	NA	NA	NA	NA	NA
C6_02420W_B	orf19.3483	PGC1	Putative phosphatidyl glycerol phospholipase C; Plc1-regulated; flow model biofilm induced; Spider biofilm induced	-2.65426	-1.55442	-2.18057	-1.84555	NA	NA	NA
C2_02600C_B	FGR22		Putative phosphatidylinositol-specific phospholipase C (PI-PLC); predicted type 2 membrane protein; no S. cerevisiae ortholog; role in, and regulated by, filamentation, Hap43p; almost identical to orf19.5797	2.53136	2.96354	NA	NA	NA	NA	NA
C6_01030W_A	HAL22		Putative phosphoadenosine-5'-phosphate or 3'-phosphoadenosine 5'-phosphosulfate phosphatase; possible role in sulfur recycling; Hap43-repressed; F-12/CO2 biofilm induced	NA	-1.61696	NA	NA	NA	NA	NA
C1_04320W_B	GPM2		Putative phosphoglycerate mutase; repressed in hyphae; macrophage/pseudohyphal-repressed; induced by high levels of peroxide stress, farnesol; flow model biofilm induced; rat catheter and Spider biofilm repressed	-1.73829	-1.85862	NA	NA	NA	NA	NA
C3_06920W_B	orf19.6809	PMU1	Putative phosphomutase-like protein; protein present in exponential and stationary growth phase yeast; Hap43-repressed; Spider biofilm repressed	-1.76511	NA	NA	NA	NA	NA	NA
C4_02720C_B	orf19.2726	SFK1	Putative plasma membrane protein; Plc1-regulated; Spider biofilm induced	NA	NA	NA	NA	NA	-1.59	-2.06
C3_07470W_B	orf19.6741	PUN1	Putative plasma membrane protein; predicted role in cell wall integrity; regulated by Nrg1, Tup1; induced during chlamydospore formation in both C. albicans and C. dubliniensis	1.63892	NA	NA	NA	NA	NA	NA
C4_03360C_B	VTC4	VTC4	Putative polyphosphate synthetase; decreased expression in hyphae compared to yeast-form cells; fungal-specific (no human or murine homolog); virulence-group-correlated expression	-2.06789	-1.78679	NA	NA	NA	NA	NA
C5_02600W_B	PUT1	PUT1	Putative proline oxidase; alkaline upregulated by Rim101; flow model biofilm induced; Spider biofilm induced	NA	2.96028	NA	1.71377	NA	NA	NA
C4_05460C_B	OFD1	TPA1	Putative prolyl hydroxylase family member; regulates Ume6p stability in response to oxygen; inhibited by hypoxia; repressed by prostaglandins; Spider biofilm induced	-1.64154	-1.73269	NA	NA	NA	NA	NA
C7_03250C_B	PDI1	PDI1	Putative protein disulfide-isomerase; antigenic in human infection; soluble protein in hyphae; induced by filamentous growth; protein present in exponential and stationary growth phase yeast cultures; flow model biofilm repressed	NA	1.81115	NA	NA	NA	NA	NA
C3_06490W_B	orf19.7437	YJL218W	Putative protein of unknown function; Hap43p-repressed gene; ortholog of S. cerevisiae YJL218W	-2.00874	NA	NA	NA	NA	NA	NA
C5_05200C_B	orf19.4013	YHR045W	Putative protein of unknown function; Hap43p-repressed gene; S. cerevisiae ortholog YHR045W localizes to the endoplasmic reticulum	-2.26417	-1.88809	NA	NA	NA	NA	NA
CR_10340W_B	PTP3	PTP3	Putative protein tyrosine phosphatase; hypha induced; alkaline induced; regulated by Efg1, Ras1, cAMP pathways; mutants are viable; Spider biofilm induced; rat catheter biofilm repressed; flow model biofilm repressed	1.82531	1.68565	NA	NA	NA	-1.5	NA
C1_05300C_B	PRD1	PRD1	Putative proteinase; transcript regulated by Nrg1, Mig1, and Tup1; Hogp-induced; stationary phase enriched protein; Hap43-repressed; rat catheter biofilm repressed	-2.63414	-2.28596	NA	NA	NA	NA	NA
C7_00660W_B	GAC1	GAC1	Putative regulatory subunit of ser/thr phosphoprotein phosphatase 1; fluconazole-induced; caspofungin repressed; transcript induced by Mnl1 under weak acid stress; regulated by Nrg1, Tup1; Spider and flow model biofilm induced	NA	-1.61957	NA	NA	NA	NA	1.54
C2_05030C_B	RHO3	RHO3	Putative Rho family GTPase; possible substrate of protein farnesyltransferase and geranylgeranyltransferase type I; greater transcription in hyphal form than yeast form; plasma membrane-localized	NA	1.51141	NA	NA	NA	NA	NA
C6_03260W_A	orf19.5614	RNH1	Putative ribonuclease H1; possibly an essential gene, disruptants not obtained by UAU1 method; flow model biofilm induced; Spider biofilm induced	NA	1.6017	NA	NA	NA	NA	NA
C2_07570W_B	RNR22		Putative ribonucleoside diphosphate reductase;colony morphology-related gene regulation by Ssn6; transcript regulated by tyrosol and cell density; Hap43-repressed; Spider biofilm induced	-3.77115	-4.57744	-4.25567	-4.33738	NA	NA	NA
C2_03670W_B	SAP99		Putative secreted aspartyl protease; possible Kex2 substrate; induced by low iron; repressed by alpha pheromone in SpiderM medium; possibly essential (UAU1 method); regulated by Sef1, Sfu1, and Hap43; Spider biofilm induced	-1.77265	-2.06579	NA	NA	NA	2.55	2.77
C7_01540W_B	ALK6		Putative ser/thr kinase involved in glucose transport; Tn mutation affects filamentous growth; fluconazole-induced; ketoconazole-repressed; induced in by alpha pheromone in SpiderM; possibly essential; flow model biofilm induced	NA	-1.60161	NA	NA	NA	NA	NA
C1_02120C_B	SHA3	SKS1	Putative ser/thr kinase involved in glucose transport; Tn mutation affects filamentous growth; fluconazole-induced; ketoconazole-repressed; induced in by alpha pheromone in SpiderM; possibly essential; flow model biofilm induced	NA	NA	NA	1.96655	NA	NA	NA
C1_00390W_B	ENA2	ENA2	Putative sodium transporter; induced by ciclopirox olamine; alkaline induced by Rim101; repressed by high-level peroxide stress; induced in oral candidiasis clinical isolates; possibly essential gene; rat catheter and Spider biofilm induced	1.77374	NA	1.86051	NA	NA	NA	NA
C3_03440C_B	orf19.341		Putative spermidine export pump; fungal-specific (no human or murine homolog)	NA	NA	-1.96797	-2.01126	NA	NA	NA
C2_08170W_B	orf19.2168	SAY1	Putative sterol deacetylase; flow model biofilm induced; rat catheter biofilm repressed	NA	-2.04725	NA	NA	NA	NA	1.82
C4_02610C_B	SUL2	SUL1	Putative sulfate transporter; transcript negatively regulated by Sfu1; amphotericin B induced; F-12/CO2 and Spider biofilm induced	-1.91227	-4.34451	NA	-2.35992	NA	1.53	1.63
C2_06170C_B	ECM17	MET5	Putative sulfite reductase beta subunit; role in cell wall biogenesis; regulated by Tsa1/Tsa1B in H2O2 stress; Gcn4-regulated; Tbf1-activated; Hap43-repressed; Spider, flow, F-12/CO2 model biofilm induced	NA	-2.78898	NA	NA	NA	NA	NA
C4_02120W_B	ERV29	ERV29	Putative SURF4 family member; plasma membrane-localized; flow model biofilm repressed	NA	1.9954	NA	1.6244	NA	NA	NA
C6_02500C_B	GCV1	GCV1	Putative T subunit of glycine decarboxylase; transcript negatively regulated by Sfu1; Spider biofilm repressed	-2.52544	-1.85168	-2.14208	-1.50349	NA	NA	NA
C4_04000W_B	MET4	MET4	Putative transcription coactivator; predicted role in sulfur amino acid metabolism; required for yeast cell adherence to silicone substrate; Spider biofilm induced	-2.29503	-3.28906	NA	NA	NA	NA	NA
CR_01900C_A	HNM3	BIO5	Putative transporter; Hap43, flucytosine repressed; possibly essential, disruptants not obtained by UAU1 method; Spider biofilm induced	NA	-1.5414	NA	NA	NA	NA	NA
CR_01220W_B	orf19.3232		Putative transporter; mutation confers hypersensitivity to toxic ergosterol analog; fungal-specific (no human or murine homolog)	NA	-1.51089	NA	-1.84595	NA	NA	NA
C1_01130W_B	orf19.3301	MET30	Putative ubiquitin ligase complex component; induced by heavy metal (cadmium) stress; Hog1-induced; transcript induced by Mnl1p under weak acid stress; flow model biofilm induced; Spider biofilm induced	-1.6124	-1.62924	-1.65161	NA	NA	NA	NA
C4_05250W_B	orf19.6864		Putative ubiquitin-protein ligase; role in protein ubiquitination; Spider biofilm induced	1.76371	1.59378	NA	NA	NA	NA	NA
C2_07730W_B	YVC1	YVC1	Putative vacuolar cation channel shock; repressed by alpha pheromone in SpiderM medium; flow model biofilm repressed	NA	2.29575	NA	1.58245	NA	NA	NA
C7_03860W_B	orf19.7196	PRB1	Putative vacuolar protease; upregulated in the presence of human neutrophils; Spider biofilm induced	-2.00741	-1.58492	NA	NA	NA	NA	NA
C4_05300W_B	XKS1	XKS1	Putative xylulokinase; Hap43-repressed; induced by prostaglandins; rat catheter biofilm repressed	-1.59197	NA	NA	NA	NA	NA	NA
C1_07670W_B	ZCF4		Putative Zn(II)2Cys6 transcription factor	NA	NA	NA	NA	NA	1.74	2.01
CR_04590C_B	PDX3	PDX3	Pyridoxamine-phosphate oxidase; transcript regulated by yeast-hypha switch and by Nrg1, Mig1, Tup1; Hap43, caspofungin repressed; present in exponential and stationary phase yeast cultures	-2.84369	-2.6751	-1.73079	-1.52989	NA	NA	NA
C4_06570C_B	PDC11	PDC1	Pyruvate decarboxylase; antigenic; on hyphal not yeast cell surface; Hap43, Gcn4, Efg1, Efh1, Hsf1 regulated; fluconazole, farnesol induced; amino acid starvation repressed; flow model biofilm induced; Spider biofilm repressed	-2.00261	-3.1698	-2.31946	-4.28408	NA	NA	NA
C2_05460W_B	CDC19	CDC19	Pyruvate kinase at yeast cell surface; Gcn4/Hog1/GlcNAc regulated; Hap43/polystyrene adherence induced; repressed by phagocytosis/farnesol; hyphal growth role; stationary phase enriched; flow model biofilm induced; Spider biofilm repressed	-1.66917	-2.96367	-1.62045	-2.48432	NA	NA	NA
CR_06610W_B	STE2	STE2	Receptor for alpha factor mating pheromone, MFalpha; required for a-type cells to respond to alpha factor, for opaque a-form mating and white a-form response; possible Kex2p substrate; a-specific, alpha-factor induced, A1p-Alpha2p repressed	NA	NA	NA	NA	NA	NA	1.52
C1_02330C_B	orf19.3690.2	RPL26B	Ribosomal 60S subunit protein; Spider biofilm repressed	NA	NA	NA	NA	NA	-1.54	NA
C4_01290W_B	orf19.4658		RING finger and CHY zinc finger domain-containing protein; mutant are viable	NA	-1.59169	NA	NA	NA	NA	NA
C1_00420W_B	orf19.6065		RNA polymerase II holoenzyme/mediator subunit; regulated by Mig1, Tup1; amphotericin B, caspofungin repressed; protein present in exponential and stationary growth phase yeast; Hap43-repressed; Spider biofilm repressed	-1.69082	-1.89624	-1.52448	NA	NA	NA	NA
C7_01650W_B	orf19.6559	TFC7	RNA polymerase III transcription initiation factor complex (TFIIIC) subunit; growth phase regulated protein; downregulaated in stationary phase yeast cultures; Hap43-repressed; flow model biofilm induced; Spider biofilm repressed	-2.48567	-2.08285	NA	NA	NA	NA	NA
C6_01310W_B	FIG1	FIG1	S. cerevisiae Fig1 ortholog; an integral membrane protein required for mating; role in thigmotropism; transcript is opaque-specific and a-specific; activated by Cph1 or alpha pheromone	NA	-1.85894	NA	NA	NA	NA	1.78
C6_02280W_B	orf19.3469	STB1	S. cerevisiae ortholog Stb1 has a role in regulation of MBF-specific transcription at Start; induced in a cyr1 null mutant; Spider biofilm induced	NA	-1.63193	NA	NA	NA	NA	NA
C3_05290C_B	orf19.6008	YLL032C	S. cerevisiae ortholog YLL032C interacts with ribosomes; repressed by alpha pheromone in SpiderM medium	NA	-2.75003	NA	-2.02319	NA	NA	NA
C3_03870C_B	SAP9	YPS1	Secreted aspartyl protease; roles in adhesion, cell surface integrity; induced by antifungal drugs, stationary phase, or in white-phase cells; farnesol-downregulated in biofilm; autocatalytic processing; GPI-anchor; Spider biofilm induced	NA	NA	1.71054	NA	NA	NA	NA
C6_03490C_B	SAP1		Secreted aspartyl proteinase; acts in utilization of protein as nitrogen source; assessment of virulence role complicated by URA3 effects; regulated by growth phase, alpha-pheromone; produced by opaque cells	NA	NA	NA	NA	NA	NA	1.72
C7_03300C_B	LIP8		Secreted lipase, member of a differentially expressed lipase gene family with possible roles in nutrition and/or in creating an acidic microenvironment; LIP5 and LIP8 are expressed at all stages of both mucosal and systemic infection	NA	-2.23991	NA	NA	NA	NA	NA
C1_09580C_A	LIP1		Secreted lipase, member of a lipase gene family whose members are expressed differentially in response to carbon source and during infection; may have a role in nutrition and/or in creating an acidic microenvironment	NA	NA	NA	NA	NA	NA	1.56
C3_00600W_B	IFF11		Secreted protein required for normal cell wall structure and for virulence; member of the IFF family; Hap43p-repressed gene	-2.31612	-4.62766	-1.55351	-5.01184	NA	NA	NA
C4_05580C_B	orf19.1239		Secreted protein; exogenously expressed protein is a substrate for Kex2 processing in vitro; fluconazole-regulated; Spider biofilm induced	NA	NA	NA	NA	NA	1.59	1.9
C2_10160W_B	orf19.1765		Secreted protein; fluconazole-induced	NA	2.54901	NA	NA	NA	NA	-2.29
C2_08590W_B	YWP1		Secreted yeast wall protein; possible role in dispersal in host; mutation increases adhesion and biofilm formation; propeptide; growth phase, phosphate, Ssk1/Ssn6/Efg1/Efh1/Hap43 regulated; mRNA binds She3; flow and Spider biofilm repressed	NA	-2.52635	-2.06629	-2.47713	NA	NA	NA
C5_00070W_B	CDC11	CDC11	Septin; cell and hyphal morphology, agar-invasive growth, full virulence and kidney tissue invasion in mouse, but not kidney colonization, immunogenicity; hyphal and cell-cycle-regulated phosphorylation; rat catheter biofilm repressed	NA	1.88703	NA	NA	NA	NA	NA
C7_02130W_B	orf19.6502	YDL114W	Short-chain dehydrogenase/reductase; upregulation correlates with clinical development of fluconazole resistance	-1.55249	-2.41254	NA	-1.60959	NA	NA	NA
C1_14630C_B	orf19.7278		Similar to a region of the Tca2 (pCal) retrotransposon, which is present in strain hOG1042 as 50 to 100 copies of a linear dsDNA; rat catheter biofilm repressed	NA	-1.75112	-1.63355	-1.86043	NA	NA	NA
C2_01270W_B	CHA1		Similar to catabolic ser/thr dehydratases; repressed by Rim101; induced in low iron; regulated on white-opaque switch; filament induced; Tn mutation affects filamentation; flow model biofilm induced; Spider biofilm repressed	-1.87002	NA	-1.83252	NA	NA	NA	NA
C2_01120W_B	KAR2	KAR2	Similar to Hsp70 family chaperones; role in translocation of proteins into the ER; induced in high iron; protein present in exponential and stationary growth phase yeast cultures; flow model and Spider biofilm repressed	NA	2.04245	NA	1.64081	NA	NA	NA
C5_05180W_B	CAWG_04884		Similar to S. pombe mug180, a predicted esterase/lipase; highly induced during chlamydospore formation in both C. albicans and C. dubliniensis; flow model biofilm induced	NA	NA	NA	-1.62721	NA	NA	NA
C2_04010C_B	HSP21		Small heat shock protein; role in stress response and virulence; fluconazole-downregulated; induced in cyr1 or ras1 mutant; stationary phase enriched protein; detected in some, not all, biofilm extracts; Spider biofilm induced	-2.59933	-2.10203	-1.744	-1.84931	NA	NA	NA
C1_08590C_B	ERG1	ERG1	Squalene epoxidase, epoxidation of squalene to 2,3(S)-oxidosqualene; ergosterol biosynthesis; allylamine antifungal drug target; NADH reducing cofactor but S. cerevisiae Erg1 uses NADPH; flow model biofilm induced; Spider biofilm repressed	-3.34563	-3.39269	-2.85765	-3.01688	NA	NA	NA
C6_03320W_B	orf19.5620	YHI9	Stationary phase enriched protein; Gcn4-regulated; induced by amino acid starvation (3-AT), benomyl or in azole-resistant strain that overexpresses MDR1; flow model biofilm induced; rat catheter biofilm repressed; overlaps orf19.5621	-2.18637	-3.14988	-1.84317	-1.97081	NA	NA	NA
C6_02010C_B	GPD2		Surface protein similar to glycerol 3-P dehydrogenase; binds host Factor H, FHL-1, plasminogen; regulated by Ssn6, Nrg1, Efg1; induced by cell wall regeneration, macrophage/pseudohyphal growth, core stress response; Spider biofilm induced	-1.91888	-1.62626	-2.11498	NA	NA	NA	NA
C3_04530C_B	TEC1	TEC1	TEA/ATTS transcription factor; white cell pheromone response, hyphal gene regulation; required for Spider and RPMI biofilm formation; regulates BCR1; Cph2 regulated transcript; alkaline, rat catheter, Spider, flow model biofilm induced	NA	2.23975	NA	NA	NA	NA	NA
C3_06850W_B	FCR1		Transcription factor; repressor of fluconazole/ketoconazole/brefeldin A resistance; Tn mutation enhances filamentation; partially rescues S. cerevisiae pdr1 pdr3 fluconazole sensitivity; rat catheter biofilm induced/Spider biofilm repressed	-1.66713	-1.83618	NA	NA	NA	NA	NA
CR_07440W_B	ACE2	ACE2	Transcription factor; similar to S. cerevisiae Ace2 and Swi5; regulates morphogenesis, cell separation, adherence, virulence in a mice; mutant is hyperfilamentous; rat catheter and Spider biofilm induced	NA	-2.05315	NA	NA	NA	NA	NA
C2_08050C_B	SIT1	ARN1	Transporter of ferrichrome siderophores, not ferrioxamine B; required for human epithelial cell invasion in vitro, not for mouse systemic infection; regulated by iron, Sfu1, Rfg1, Tup1, Hap43; rat catheter and Spider biofilm induced	NA	-2.22885	NA	-1.86843	NA	NA	NA
C1_03380W_B	TPS2	TPS2	Trehalose-6-phosphate (Tre6P) phosphatase; mutant heat sensitive, accumulates Tre6P, decreased mouse virulence; possible drug target; 2 conserved phospohydrolase motifs; no mammalian homolog; Hap43-repressed; flow model biofilm induced	-1.78846	-1.94776	2.08211	NA	NA	NA	NA
CR_05720W_B	TPS1	TPS1	Trehalose-6-phosphate synthase; role in hyphal growth and virulence in mouse systemic infection; induced in presence of human neutrophils; macrophage/pseudohyphal-repressed after 16h; stationary phase enriched protein; Hap43-repressed	-2.66607	-2.47826	NA	NA	NA	NA	NA
C3_07440W_B	TPI1	TPI1	Triose-phosphate isomerase; antigenic in mouse/human; mutation affects filamentation; macrophage-repressed; protein in exponential and stationary growth phase yeast; possibly essential; flow model biofilm induced; Spider biofilm repressed	NA	-2.8558	NA	-3.46176	NA	NA	NA
C4_03610C_B	tQ(UUG)1		tRNA-Gln, predicted by tRNAscan-SE; UUG anticodon	NA	NA	-1.58788	NA	NA	NA	NA
C2_05240C_B	tQ(UUG)3		tRNA-Gln, predicted by tRNAscan-SE; UUG anticodon	NA	NA	-1.51391	NA	NA	NA	NA
C4_04690C_B	tQ(UUG)4		tRNA-Gln, predicted by tRNAscan-SE; UUG anticodon	NA	NA	-1.64921	NA	NA	NA	NA
CR_00780C_B	GSY1	GSY1	UDP glucose/starch glucosyltransferase; transcript repressed by yeast-hyphal switch, Efg1-regulated; strong oxidative stress induced; colony morphology-related regulation by Ssn6; stationary phase enriched; flow model biofilm induced	-1.74057	-2.84668	NA	-1.77427	NA	NA	NA
C1_02150W_B	GAL10	GAL10	UDP-glucose 4-epimerase; galactose utilization; mutant has cell wall defects and increased filamentation; GlcNAc-, fluconazole- and ketoconazole-induced; stationary phase enriched protein; rat catheter and flow model biofilm induced	-1.59496	NA	-2.78793	-1.6247	NA	NA	NA
C2_08290C_B	UCF1	RGI1	Upregulated by cAMP in filamentous growth; induced in high iron, decreased upon yeast-hypha switch; downregulation correlates with clinical fluconazole resistance; Ras1-regulated; Hap43-repressed; flow model biofilm induced	-2.24885	-2.40573	NA	NA	NA	NA	NA
C3_01250W_B	PMC1	PMC1	Vacuolar calcium P-type ATPase; transcript regulated by calcineurin and fluconazole; mutant shows increased resistance to fluconazole, lithium; increased sensitivity to calcium; Spider biofilm induced	NA	NA	2.36674	2.34321	NA	NA	NA
C1_07330W_B	RME1	RME1	Zinc finger protein; controls meiosis in S. cerevisae; white-specific transcript; upregulation correlates with clinical development of fluconazole resistance; Upc2-regulated in hypoxia; flow model biofilm induced; Spider biofilm repressed	-2.0729	-1.6769	NA	NA	NA	NA	NA
C1_08940C_B	MSN4	MSN2	Zinc finger transcription factor; similar to S. cerevisiae Msn4, but not a significant stress response regulator in C. albicans; partly complements STRE-activation defect of S. cerevisiae msn2 msn4 double mutant; flow model biofilm induced	NA	-1.84446	NA	NA	NA	NA	NA
C2_02590W_B	ZRT2	ZRT2	Zinc transporter; ciclopirox olamine, fluconazole, alkaline repressed; transcript induced by amphotericin B, interaction with macrophages; possibly essential (UAU1 method); induced in oralpharyngeal candidiasis; Spider biofilm induced	-2.54015	-1.79132	NA	NA	NA	1.62	NA
C3_04640W_B	ZCF31		Zn(II)2Cys6 transcription factor of unknown function; mutant is sensitive to copper and SDS, and resistant to Calcofluor White; required for yeast cell adherence to silicone substrate	NA	1.71537	NA	NA	NA	NA	NA
CR_07530C_B	ECM22		Zn(II)2Cys6 transcription factor; rat catheter and Spider biofilm induced	NA	NA	1.65042	NA	NA	NA	NA
C3_05170W_B	WOR2		Zn(II)2Cys6 transcription factor; regulator of white-opaque switching; required for maintenance of opaque state; Hap43-induced	-1.54268	-1.76443	NA	-1.51921	NA	NA	NA
C1_08190C_B	CAT8	CAT8	Zn(II)2Cys6 transcription factor; similar to S. cerevisiae Cat8 but mutant phenotype suggests different target genes; mutant displays increased filamentous/invasive growth; flucytosine repressed; rat catheter biofilm induced	-1.80021	-2.0231	NA	NA	NA	1.81	1.56
C5_03130W_B	SUT1	SUT1	Zn2Cys6 transcription factor involved in sterol uptake; flow model biofilm induced; Spider biofilm repressed	NA	2.01731	NA	NA	NA	NA	NA
CR_10110W_B	CHT3	CTS1	Major chitinase; secreted; functional homolog of S. cerevisiae Cts1p; 4 N-glycosylation motifs; possible O-mannosylation; putative signal peptide; hyphal-repressed; farnesol upregulated in biofilm; regulated by Efg1p, Cyr1p, Ras1p	NA	NA	NA	-2.17133	NA	NA	NA
C3_06670C_B	orf19.7456		Protein of unknown function; flow model biofilm repressed	NA	NA	NA	1.55231	NA	NA	NA
C5_02080C_B	HSP12		Heat-shock protein; induced by osmotic/oxidative/cadmium stress, fluphenazine treatment, low iron, CDR1 and CDR2 overexpression, or ssn6 or ssk1 null mutation; overexpression increases resistance to farnesol and azoles	NA	NA	NA	-1.49914	NA	NA	NA
C5_04930C_B	MAL31	MAL31	Putative high-affinity maltose transporter; transcript is upregulated in clinical isolates from HIV+ patients with oral candidiasis; alkaline induced; Spider biofilm induced	NA	NA	NA	-1.51056	NA	NA	NA
C6_00440C_B	FET34	FET3	Multicopper ferroxidase; induced by low iron, ciclopirox olamine, ketoconazole, hypoxia; alkaline induced by Rim101; repressed in fluconazole-resistant isolate; Sfu1, Hog1 repressed; complements S. cerevisiae fet3; Spider biofilm induced	NA	NA	NA	-1.78083	NA	NA	NA
C6_00610C_B	orf19.4196		Dubious open reading frame	NA	NA	NA	-1.90231	NA	NA	NA
C6_03610W_B	FGR17		Putative DNA-binding transcription factor; has zinc cluster DNA-binding motif; lacks an ortholog in S. cerevisiae; transposon mutation affects filamentous growth; Hap43p-repressed gene	NA	NA	NA	-1.5222	NA	NA	NA
C7_04220W_B	orf19.7151		Ortholog of Candida albicans WO-1 : CAWG_05751	NA	NA	NA	-1.66239	NA	1.6	NA
CR_04650W_B	orf19.1738.1	RBL2	Protein involved in microtubule morphogenesis; required for protection from excess free beta-tubulin; possibly involved the beta-tubulin folding; Spider biofilm repressed	NA	NA	NA	1.71047	NA	NA	NA
